# Supplementary material for: On the Validation of Protein Force Fields Based on Structural Criteria
Source: PubMed Central journal article supplement (PMC11103706; doi:10.1021/acs.jpcb.3c08469), 2024-05-07
Supplement: jp3c08469_si_005.pdf [file jp3c08469_si_005.pdf]

**Supporting information for**

**On the Validation of Protein Force Fields Based on Structural  
Criteria**

Martin Stroet<sup>1\*</sup>, Martina Setz<sup>2\*</sup>, Thomas Lee<sup>1</sup>, Alpeshkumar K. Malde<sup>3</sup>, Glen van den Bergen<sup>1</sup>, Peter Sykacek<sup>4</sup>, Chris Oostenbrink<sup>2,5†</sup> and Alan E. Mark<sup>1†</sup>

<sup>1</sup>The University of Queensland, St. Lucia, Queensland, 4072, Australia

<sup>2</sup>Institute for Molecular Modeling and Simulation, Department of Material Science and Process Engineering, University of Natural Resources and Life Sciences, Vienna, Muthgasse 18, 1190 Vienna, Austria

<sup>3</sup>Institute for Glycomics and School of Environment and Science, Griffith University, Gold Coast, Queensland, 4222, Australia.

<sup>4</sup>Institute of Computational Biology, Department of Biotechnology, University of Natural Resources and Life Sciences, Vienna, Muthgasse 18, 1190 Vienna, Austria

<sup>5</sup>Christian Doppler Laboratory for Molecular Informatics in the Biosciences, University of Natural Resources and Life Sciences, Vienna, Muthgasse 18, 1190 Vienna, Austria

\* Martina Setz and Martin Stroet contributed equally to the work.

† Corresponding authors: [chris.oostenbrink@boku.ac.at](mailto:chris.oostenbrink@boku.ac.at) and [a.e.mark@uq.edu.au](mailto:a.e.mark@uq.edu.au)

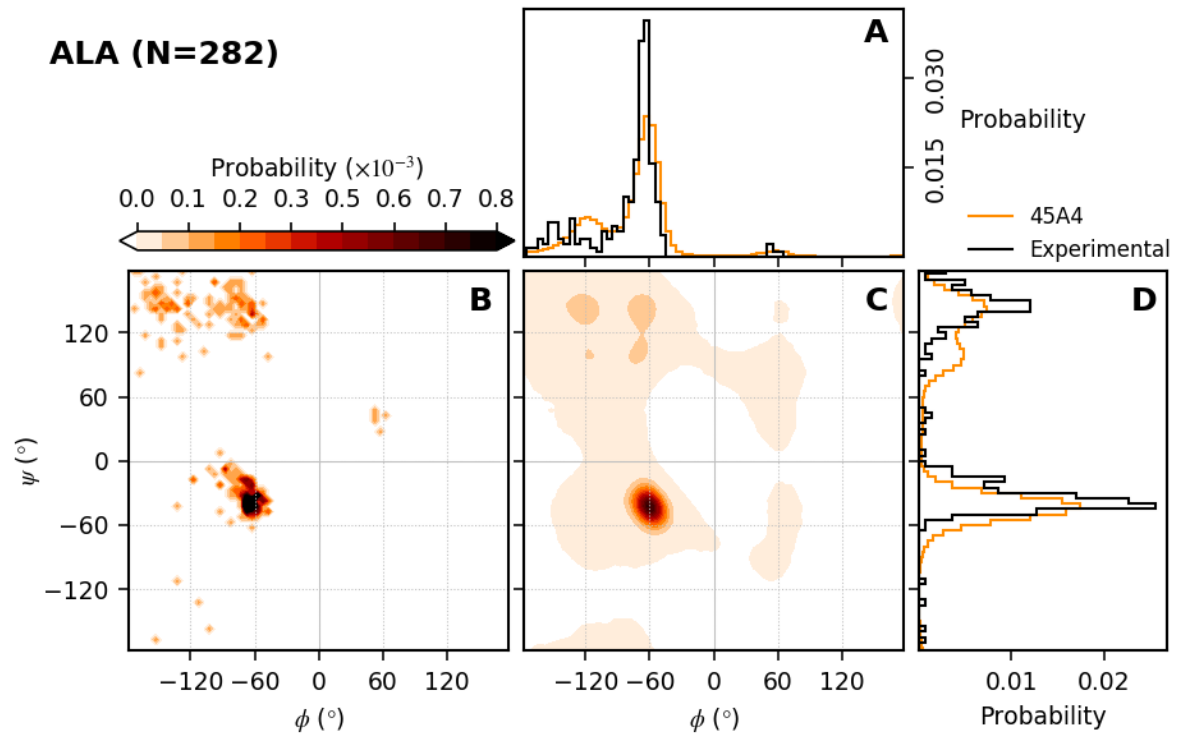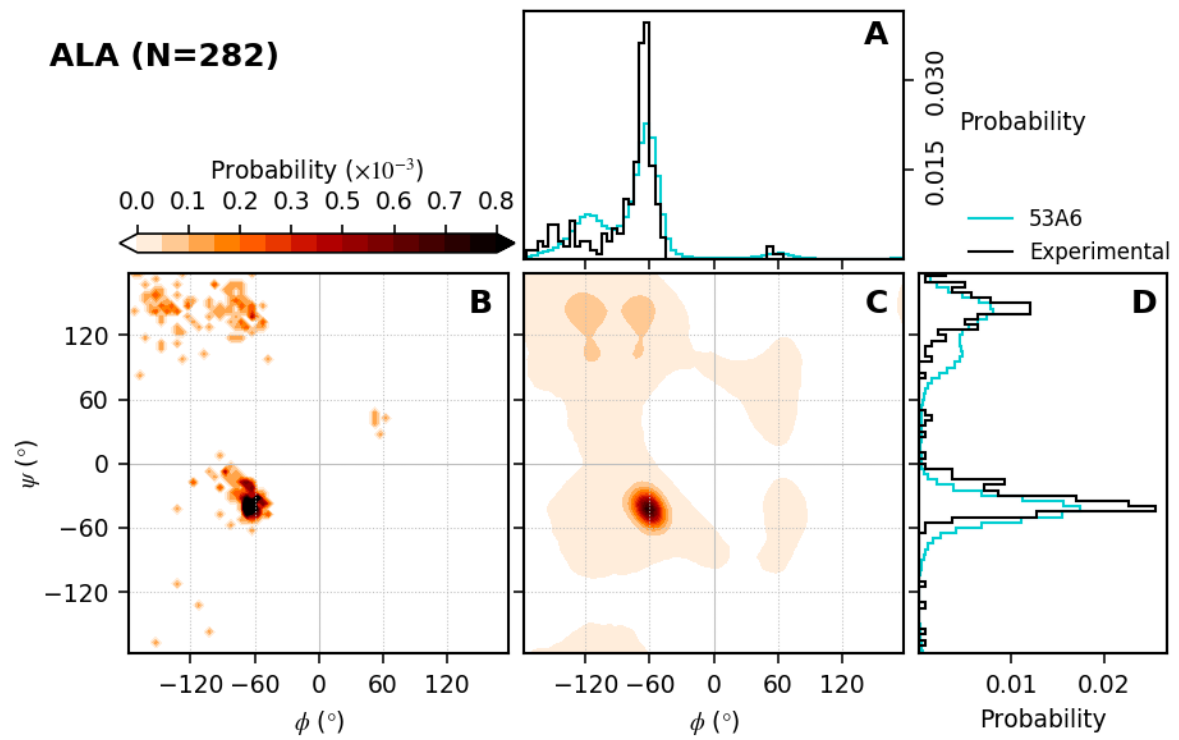

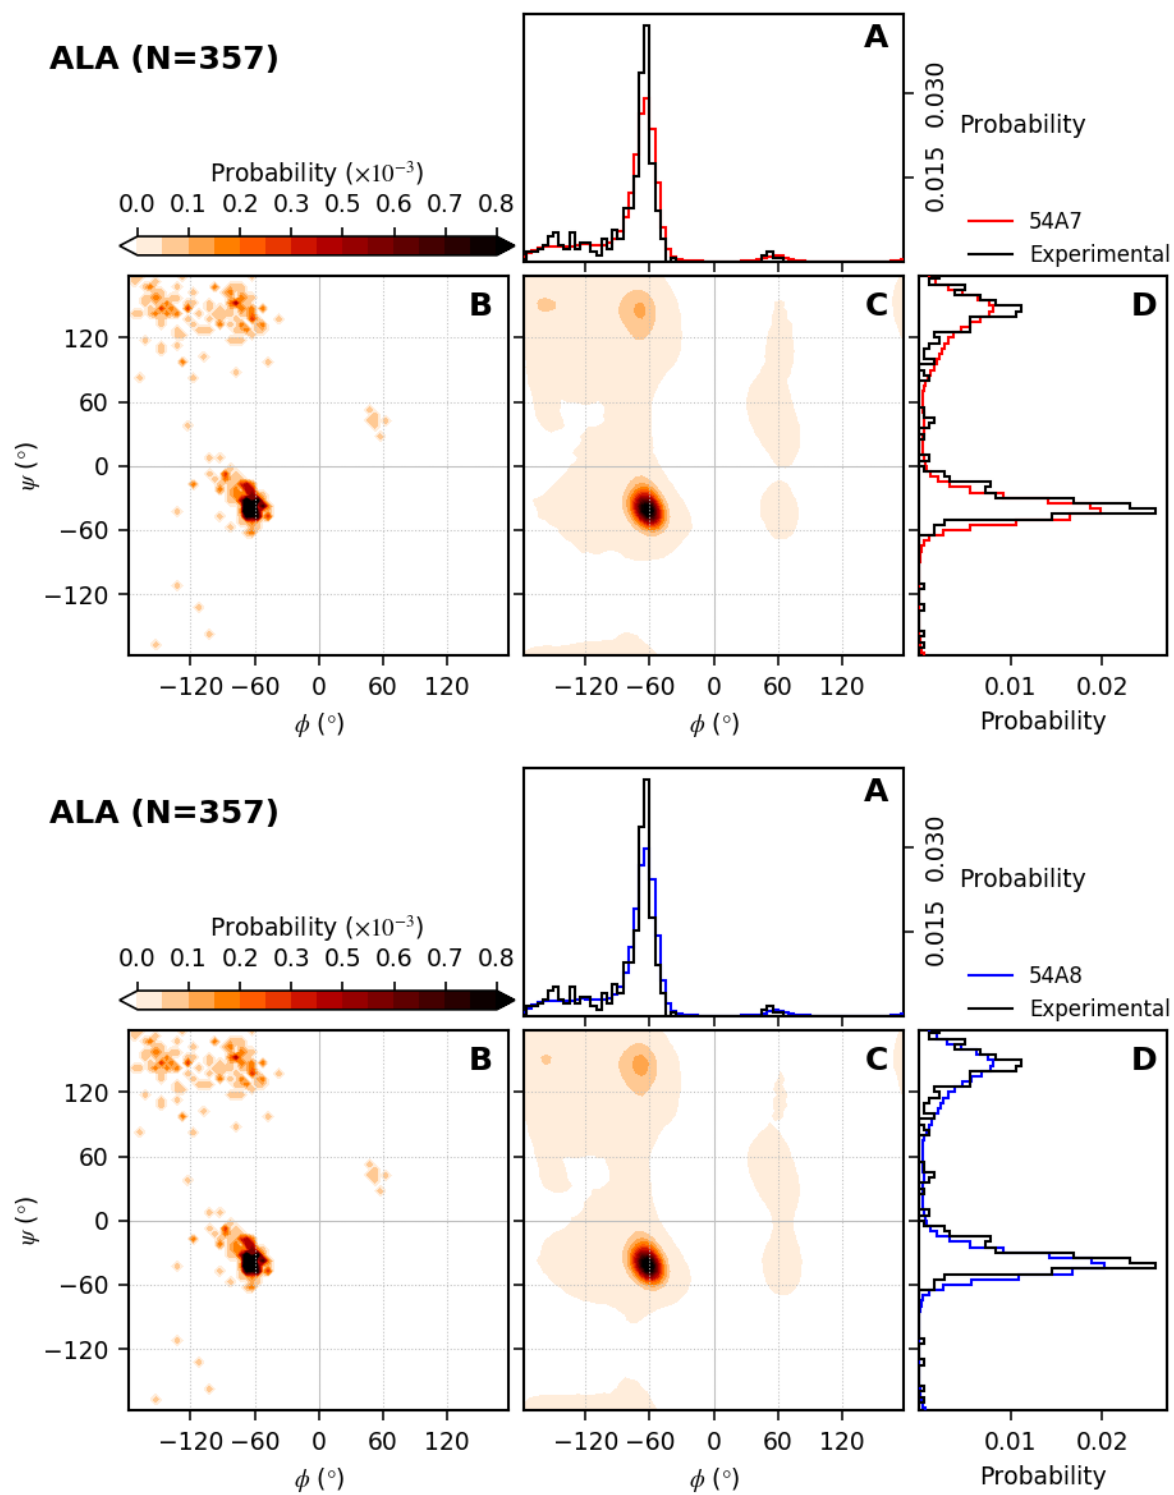

**Figure S2.** Distribution of alanine (ALA) backbone dihedral angles.

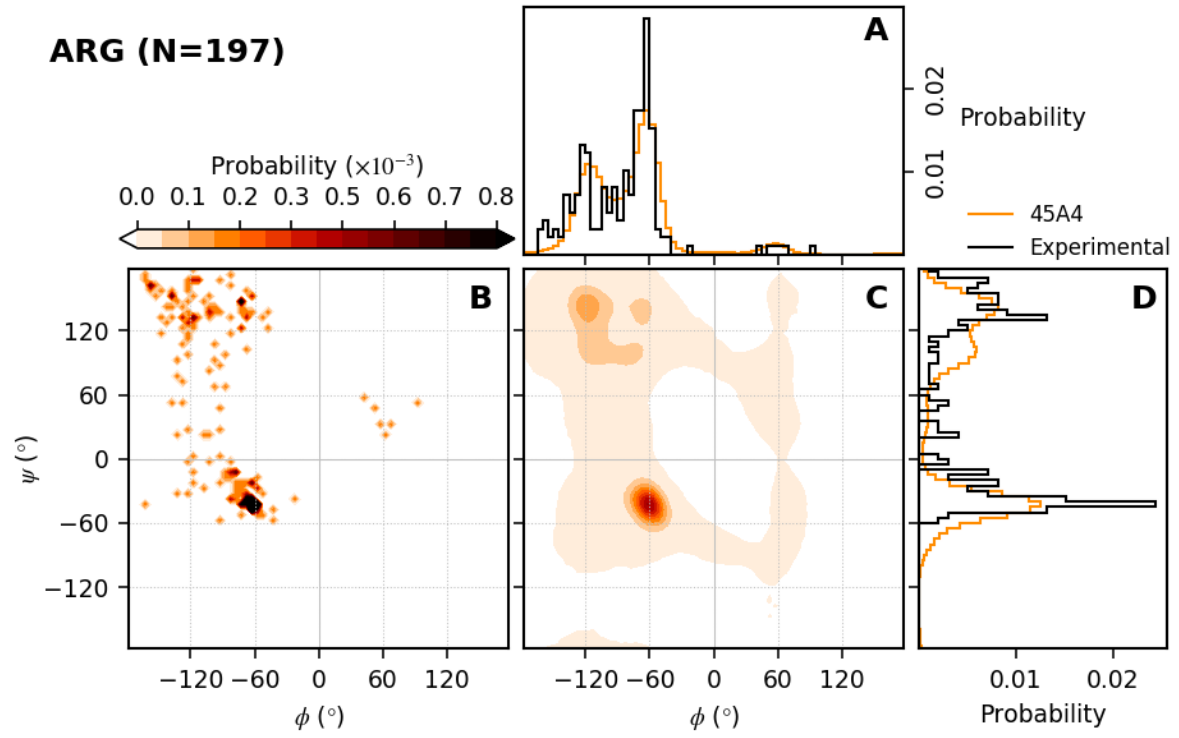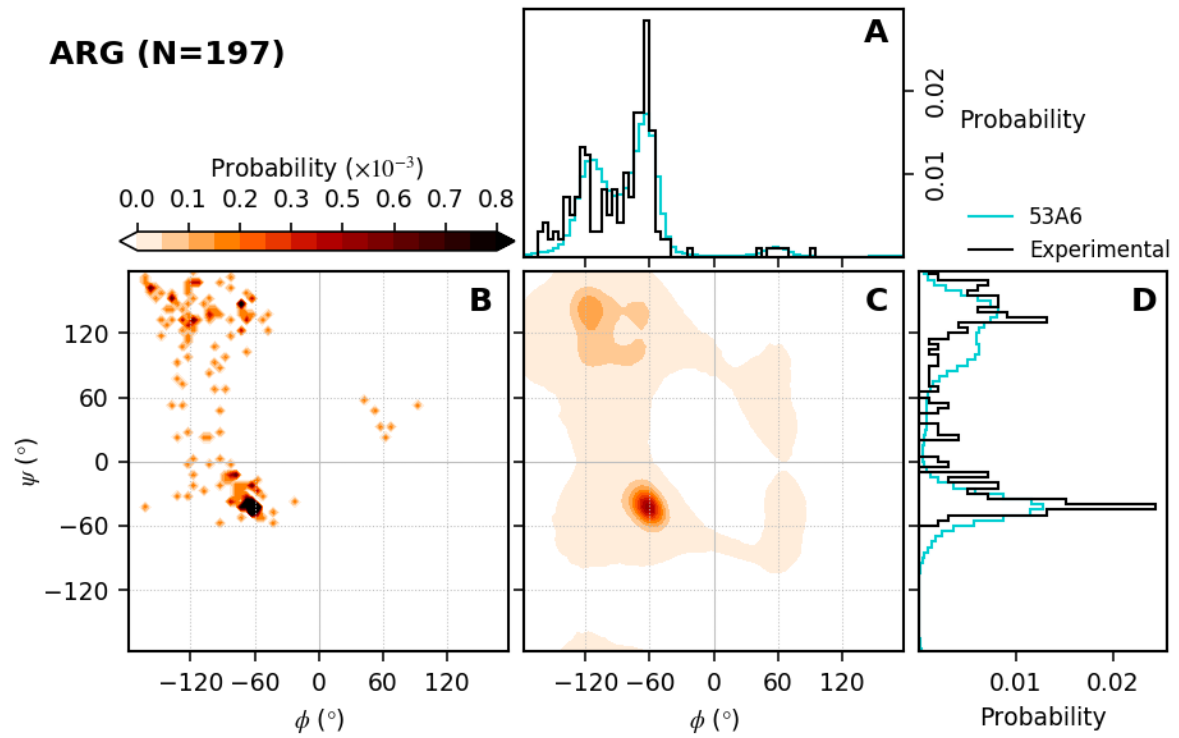

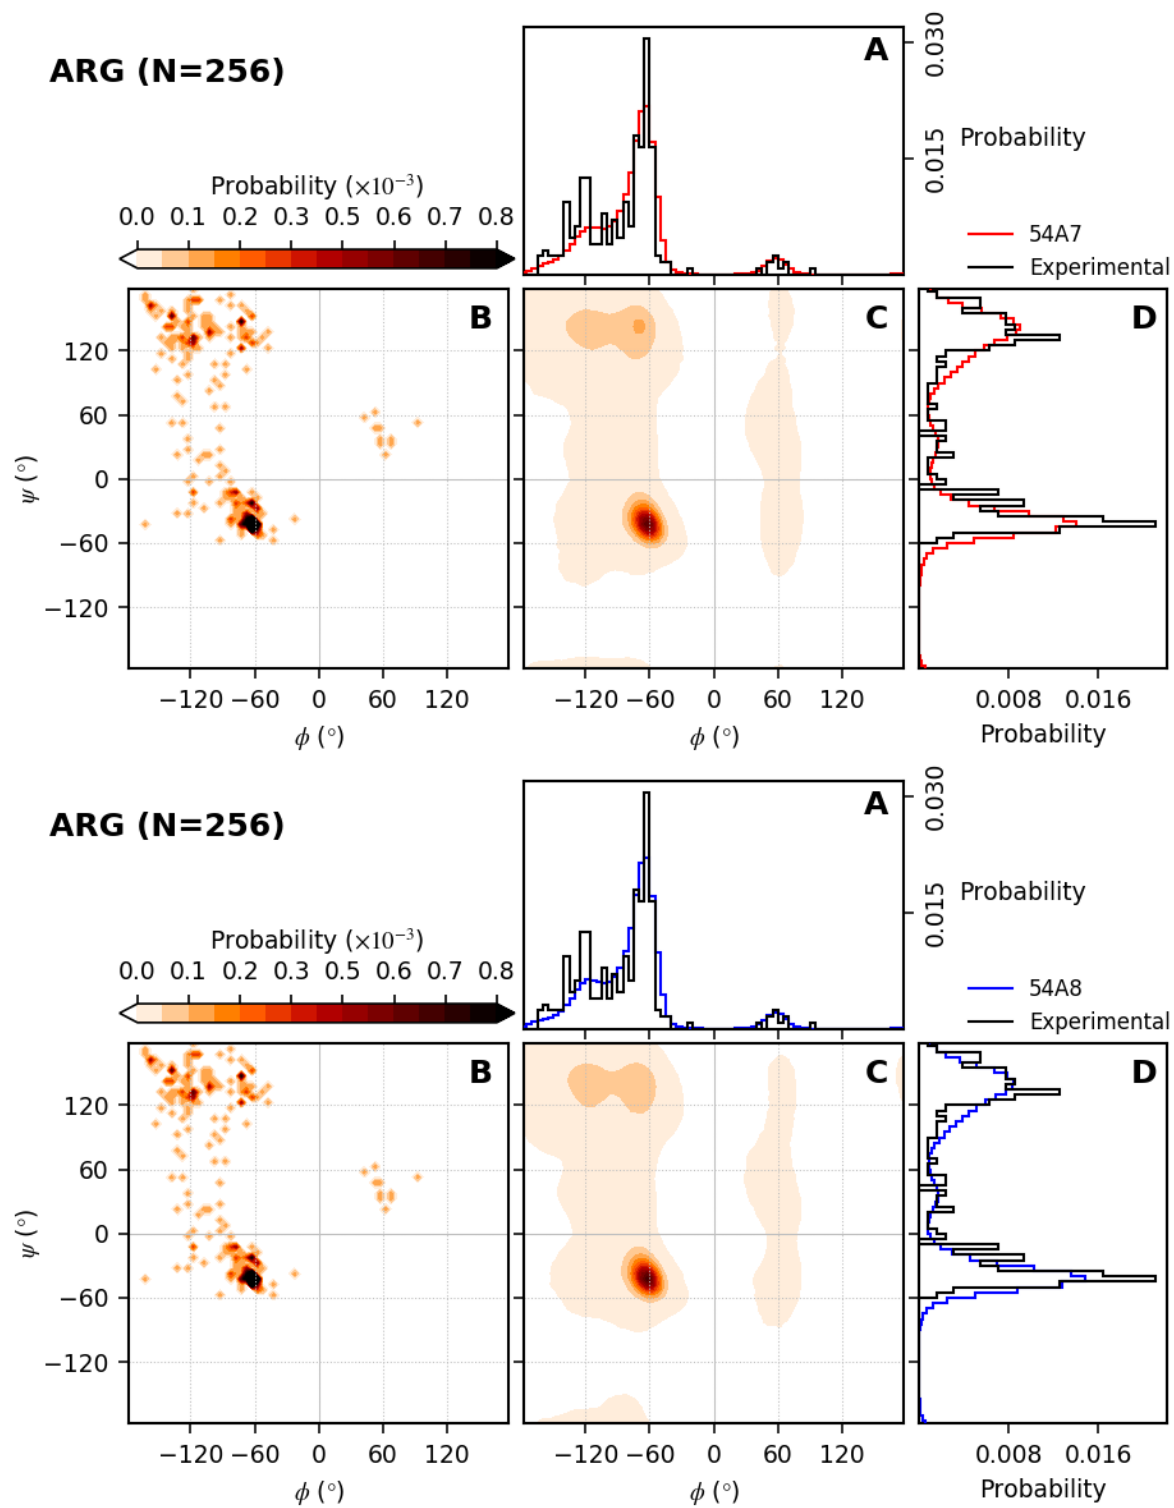

**Figure S3.** Distribution of arginine (ARG) backbone dihedral angles.

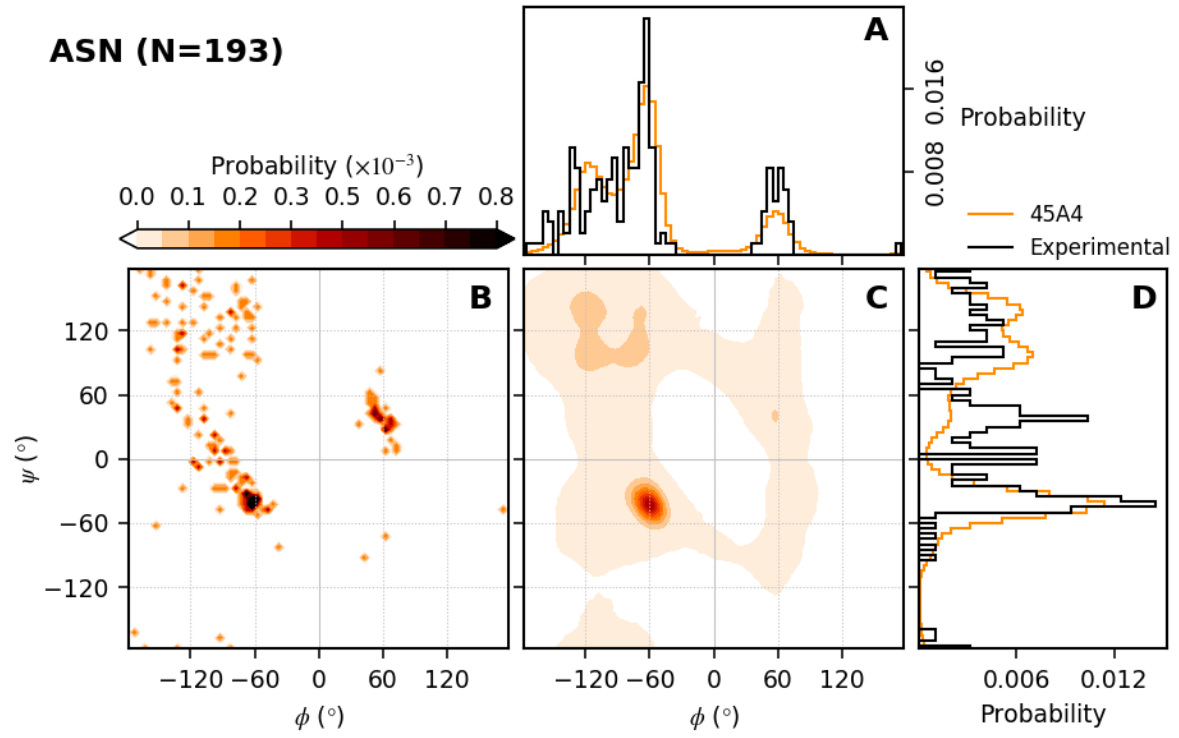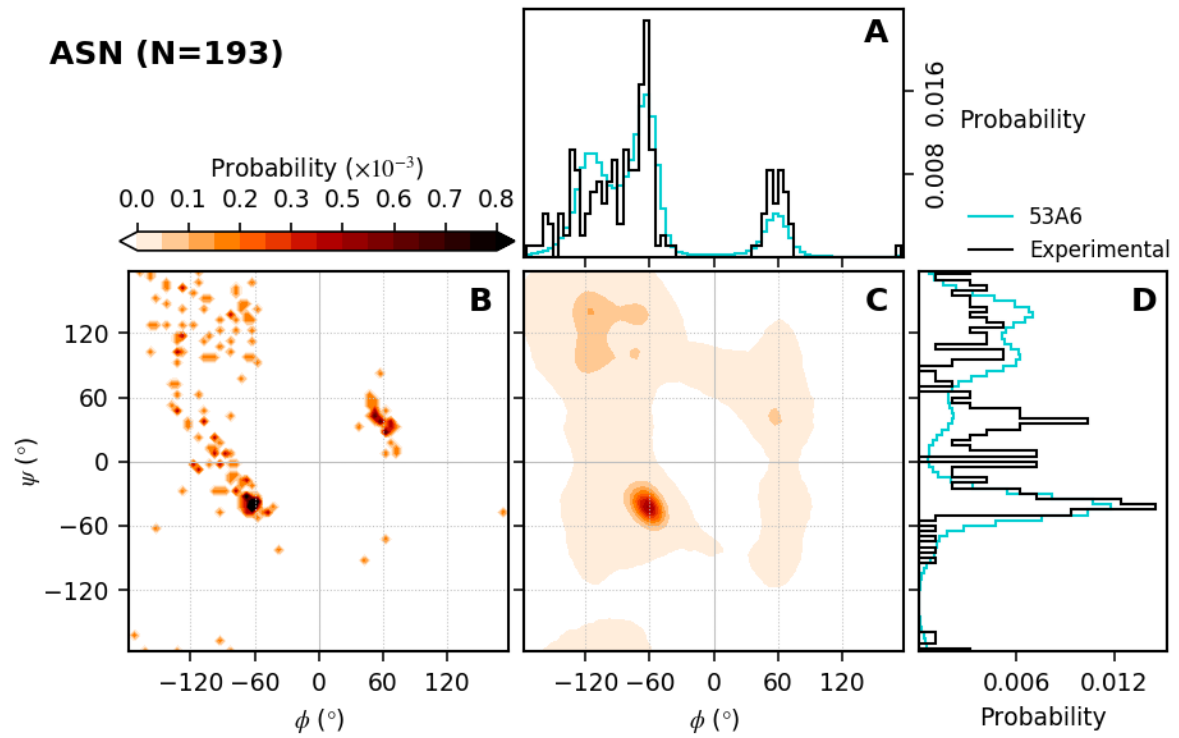

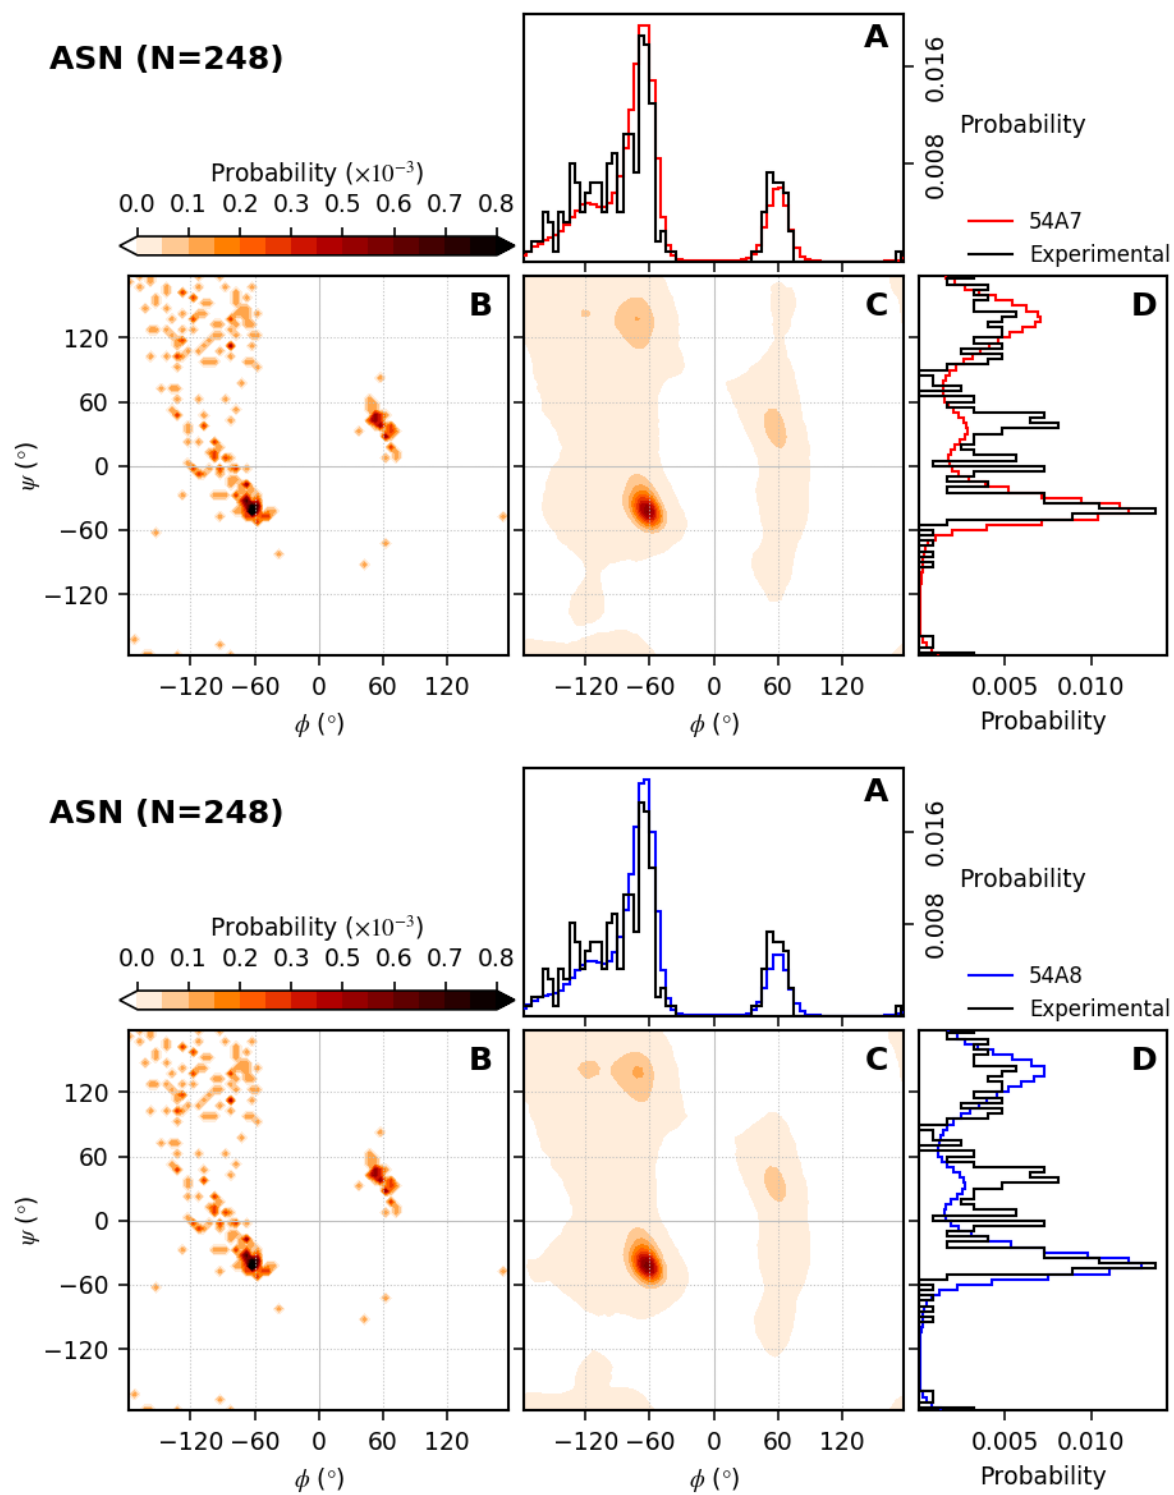

**Figure S4.** Distribution of asparagine (ASN) backbone dihedral angles.

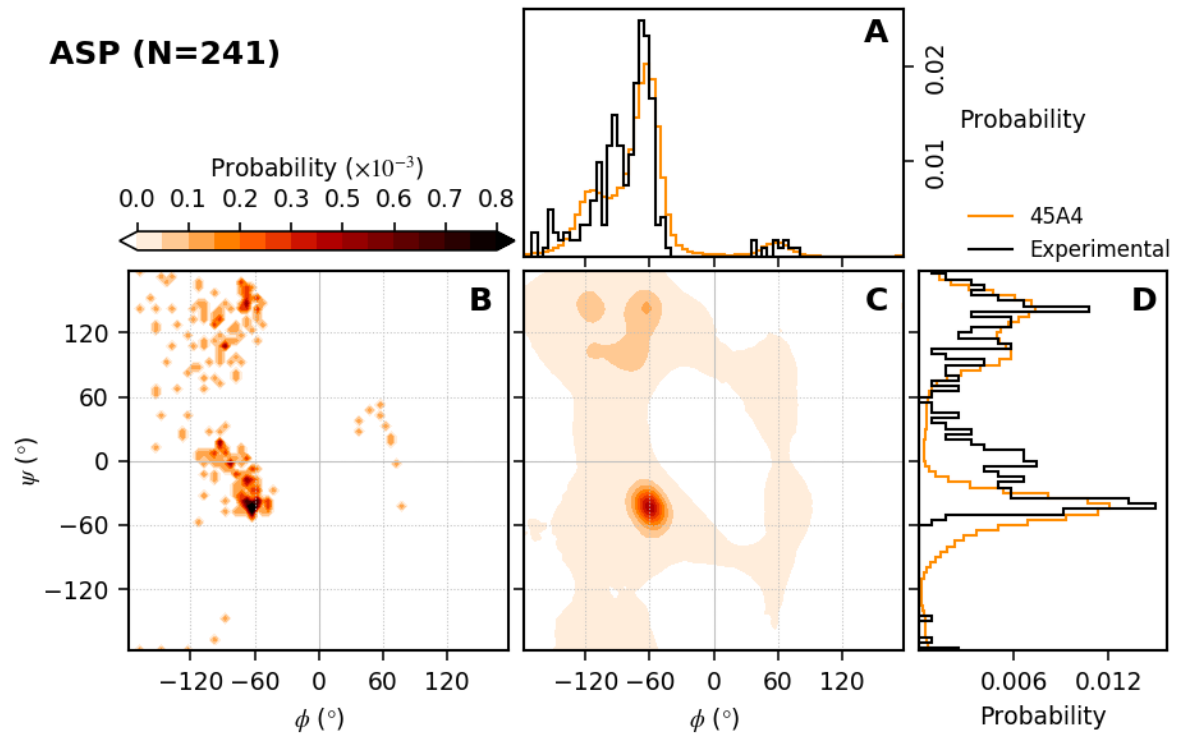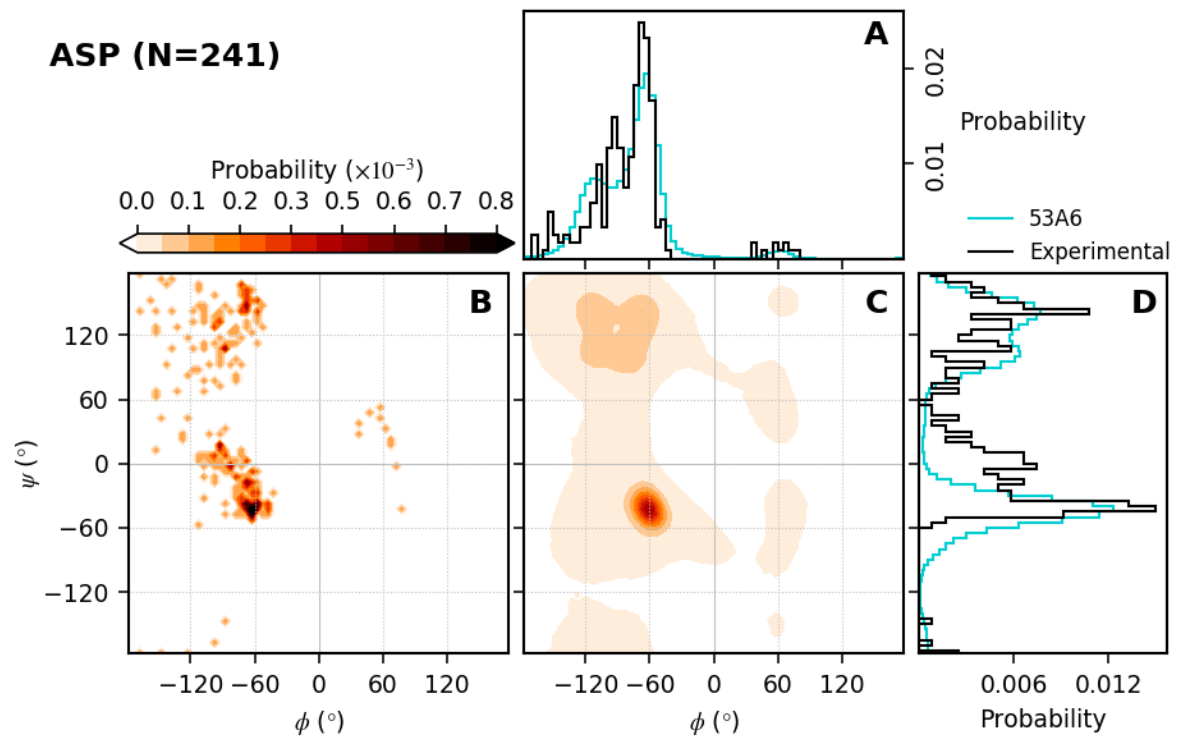



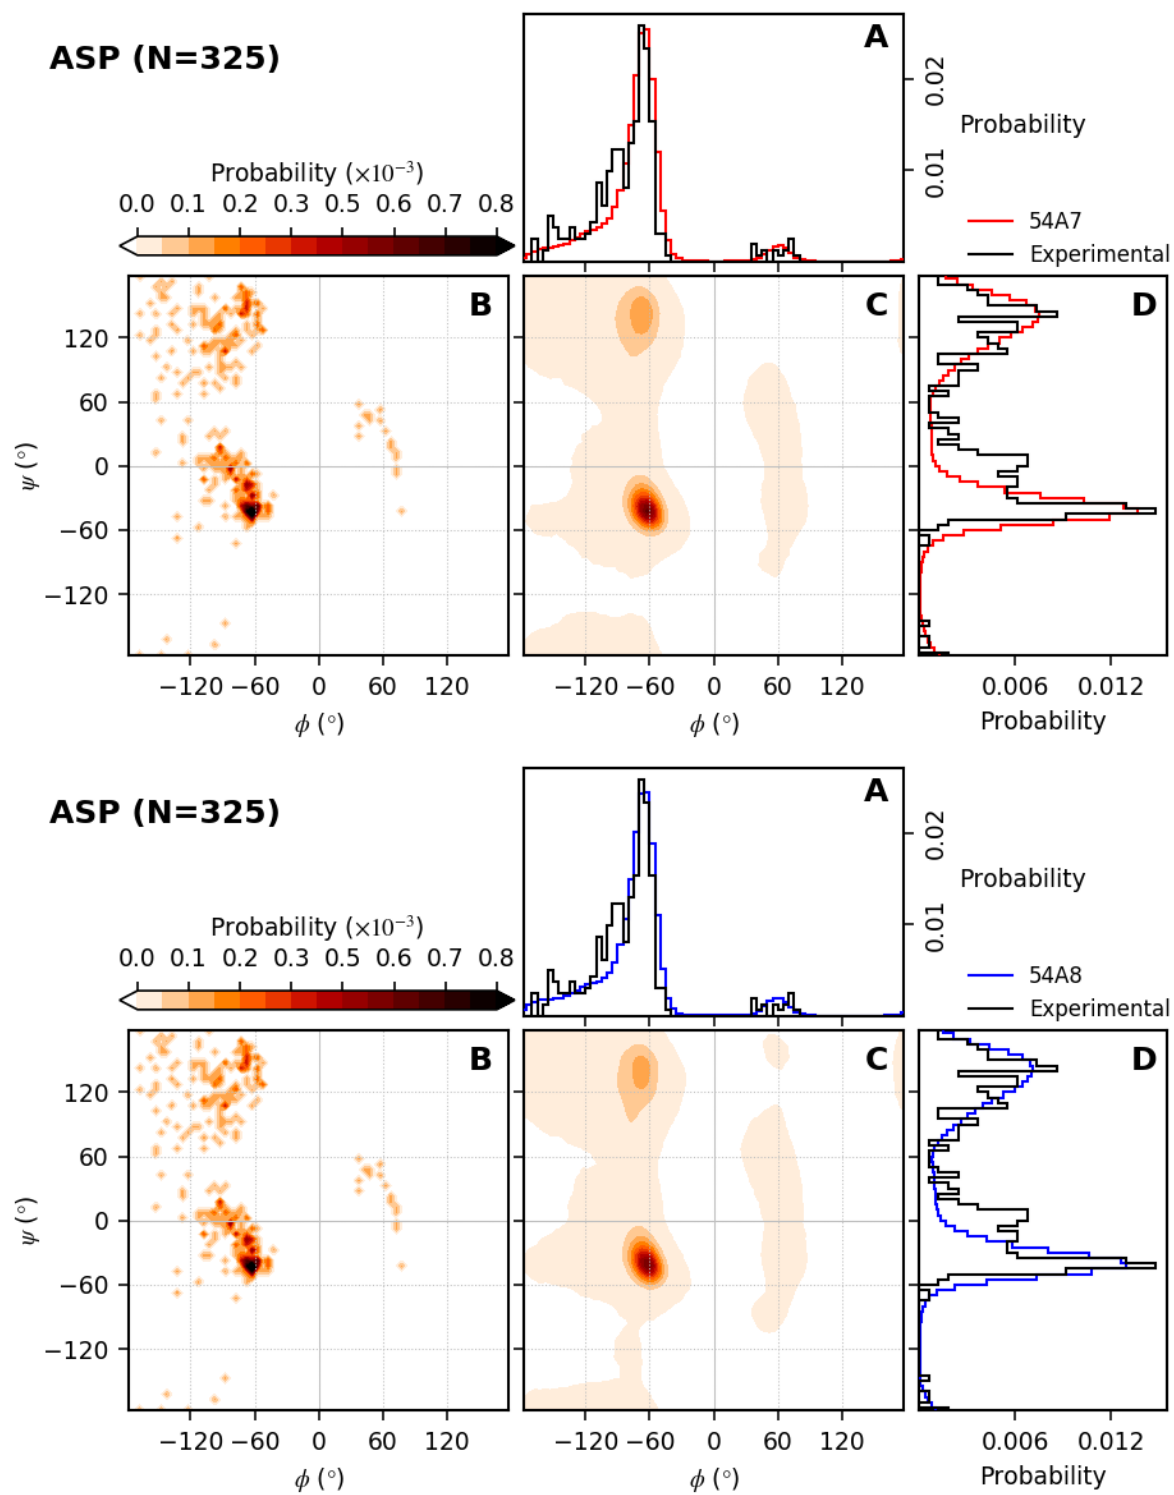

**Figure S5.** Distribution of aspartic acid (ASP) backbone dihedral angles.

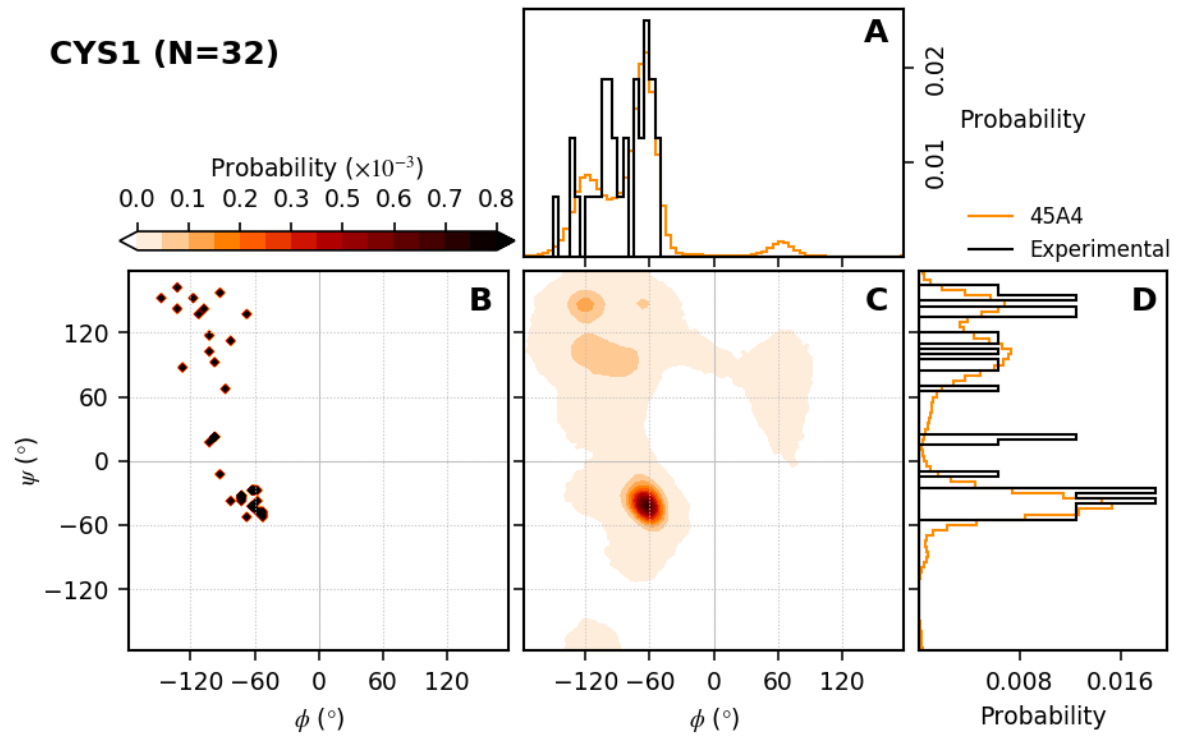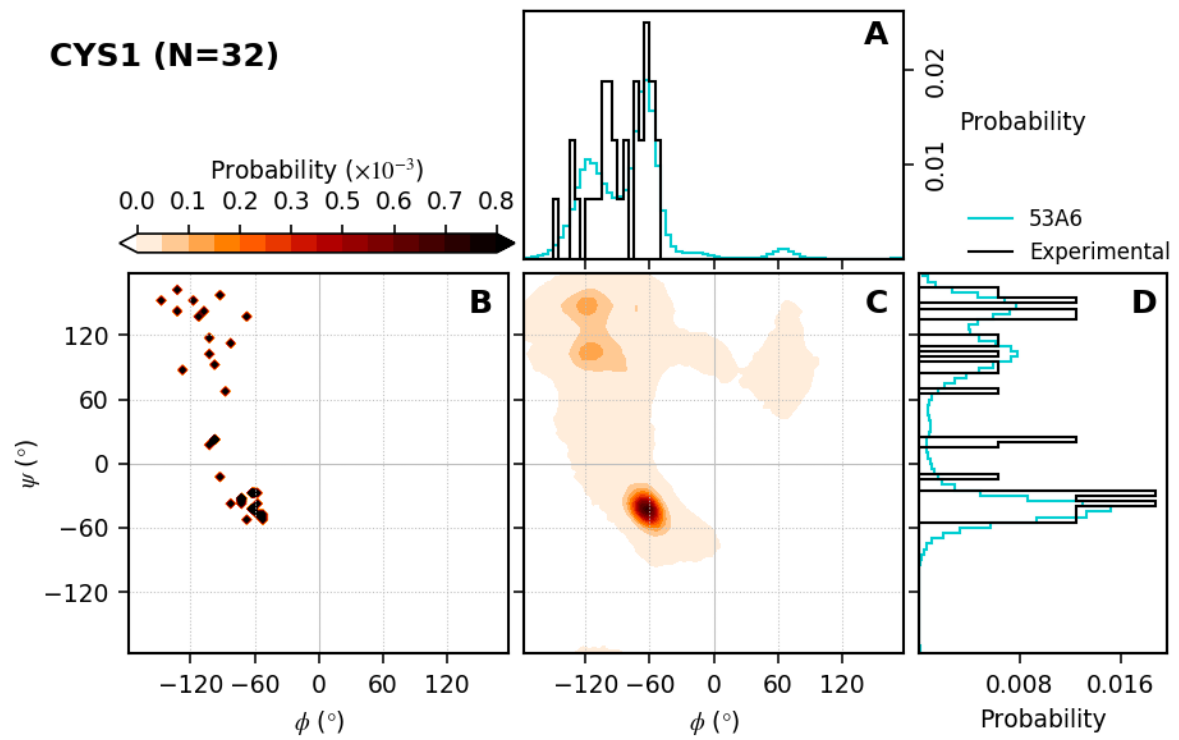

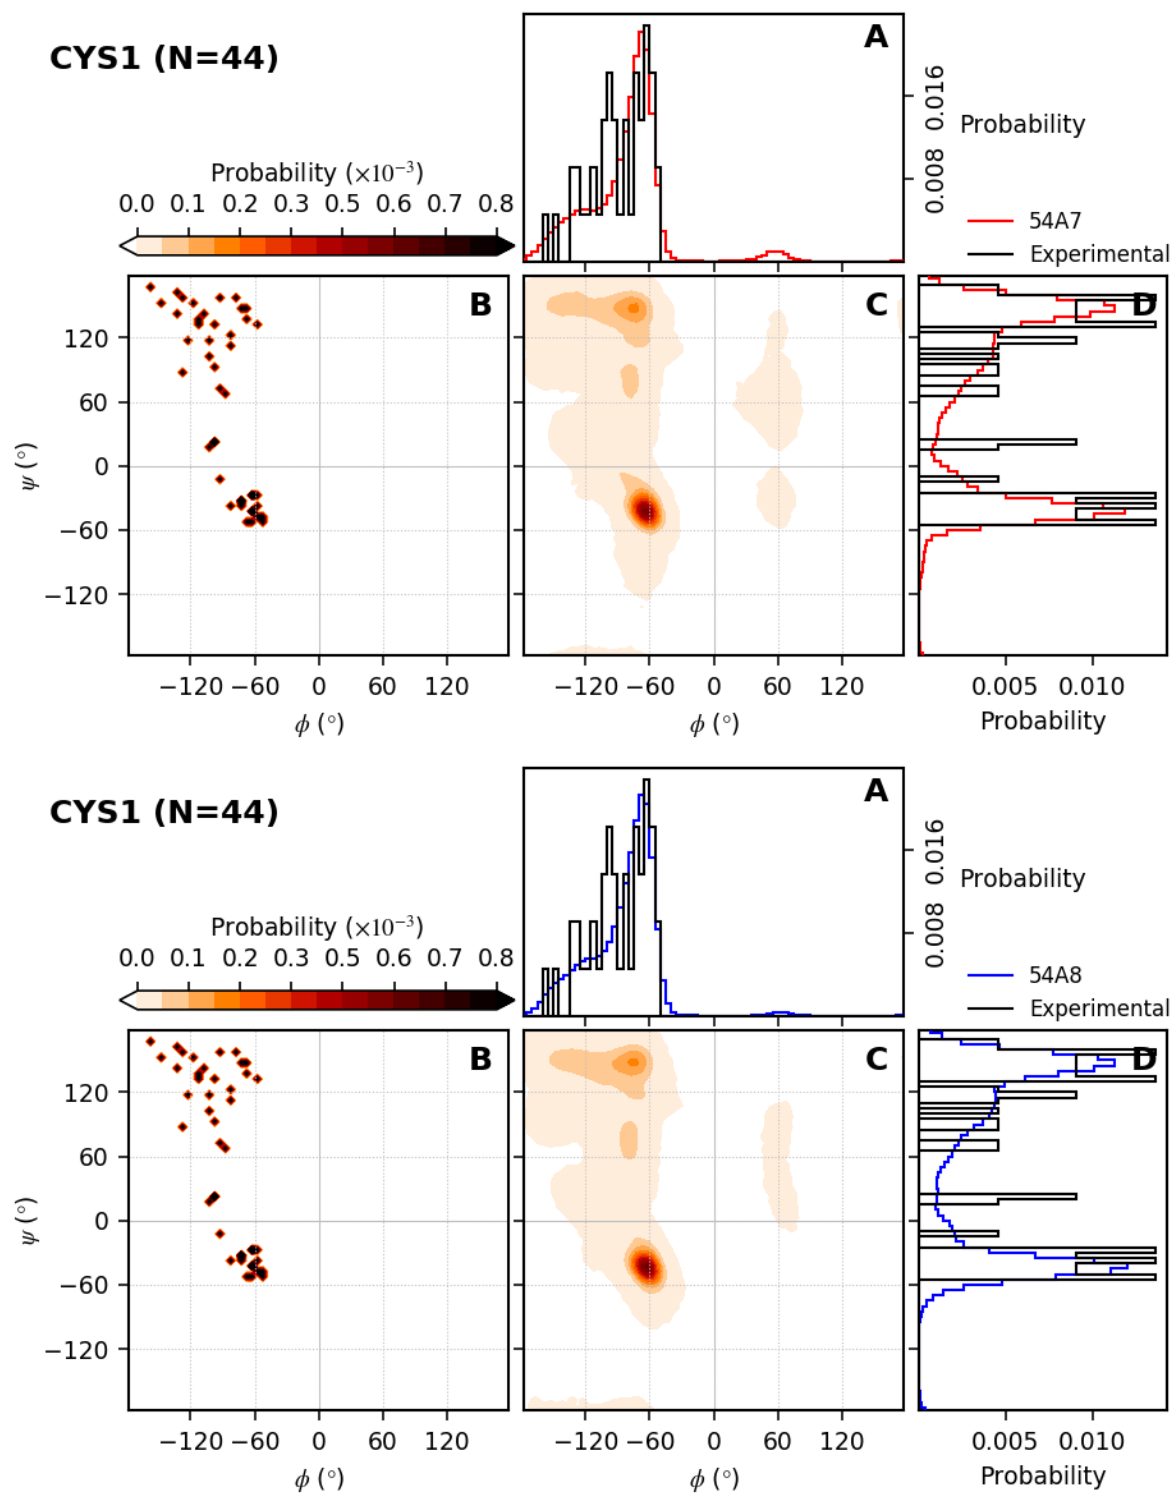

**Figure S6.** Distribution of first cysteine in S-S bridge (CYS1) backbone dihedral angles.

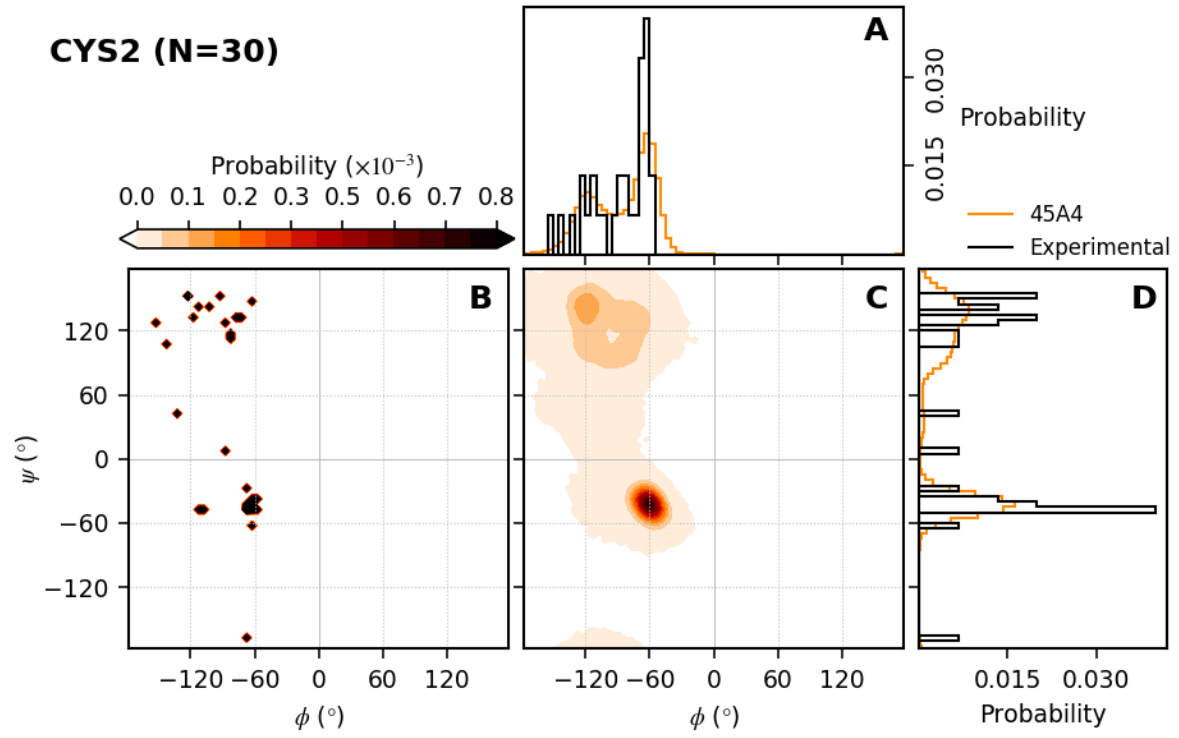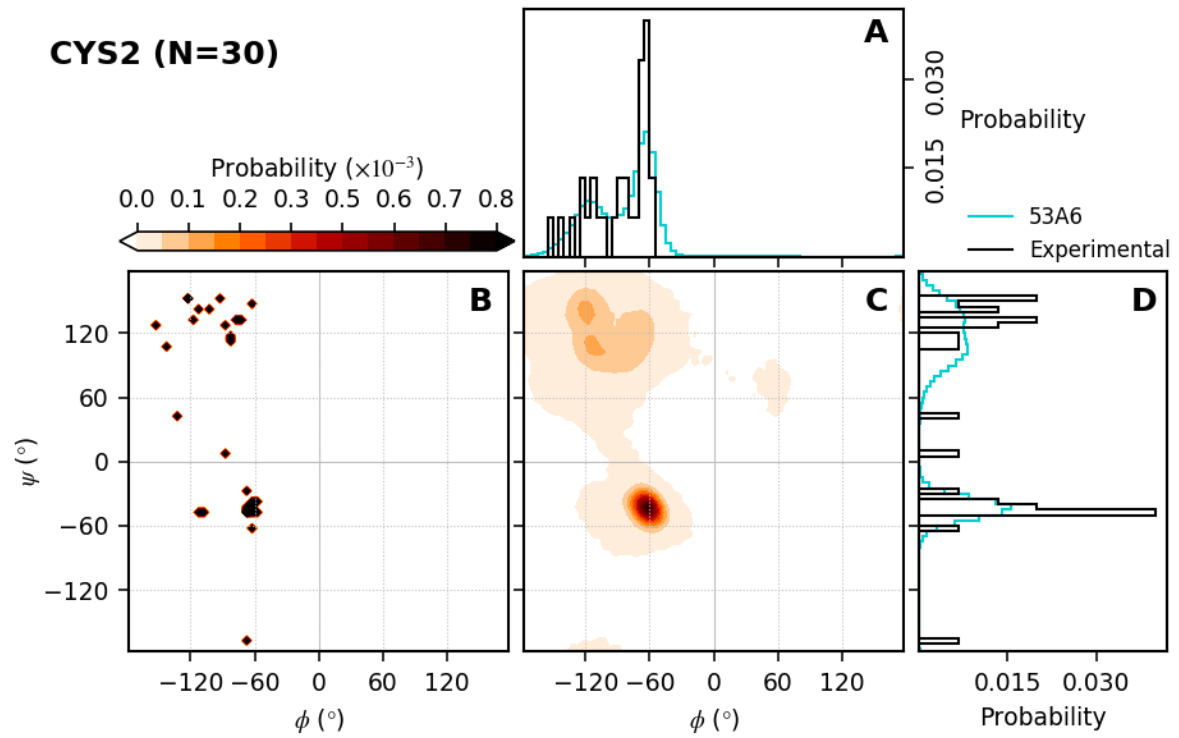

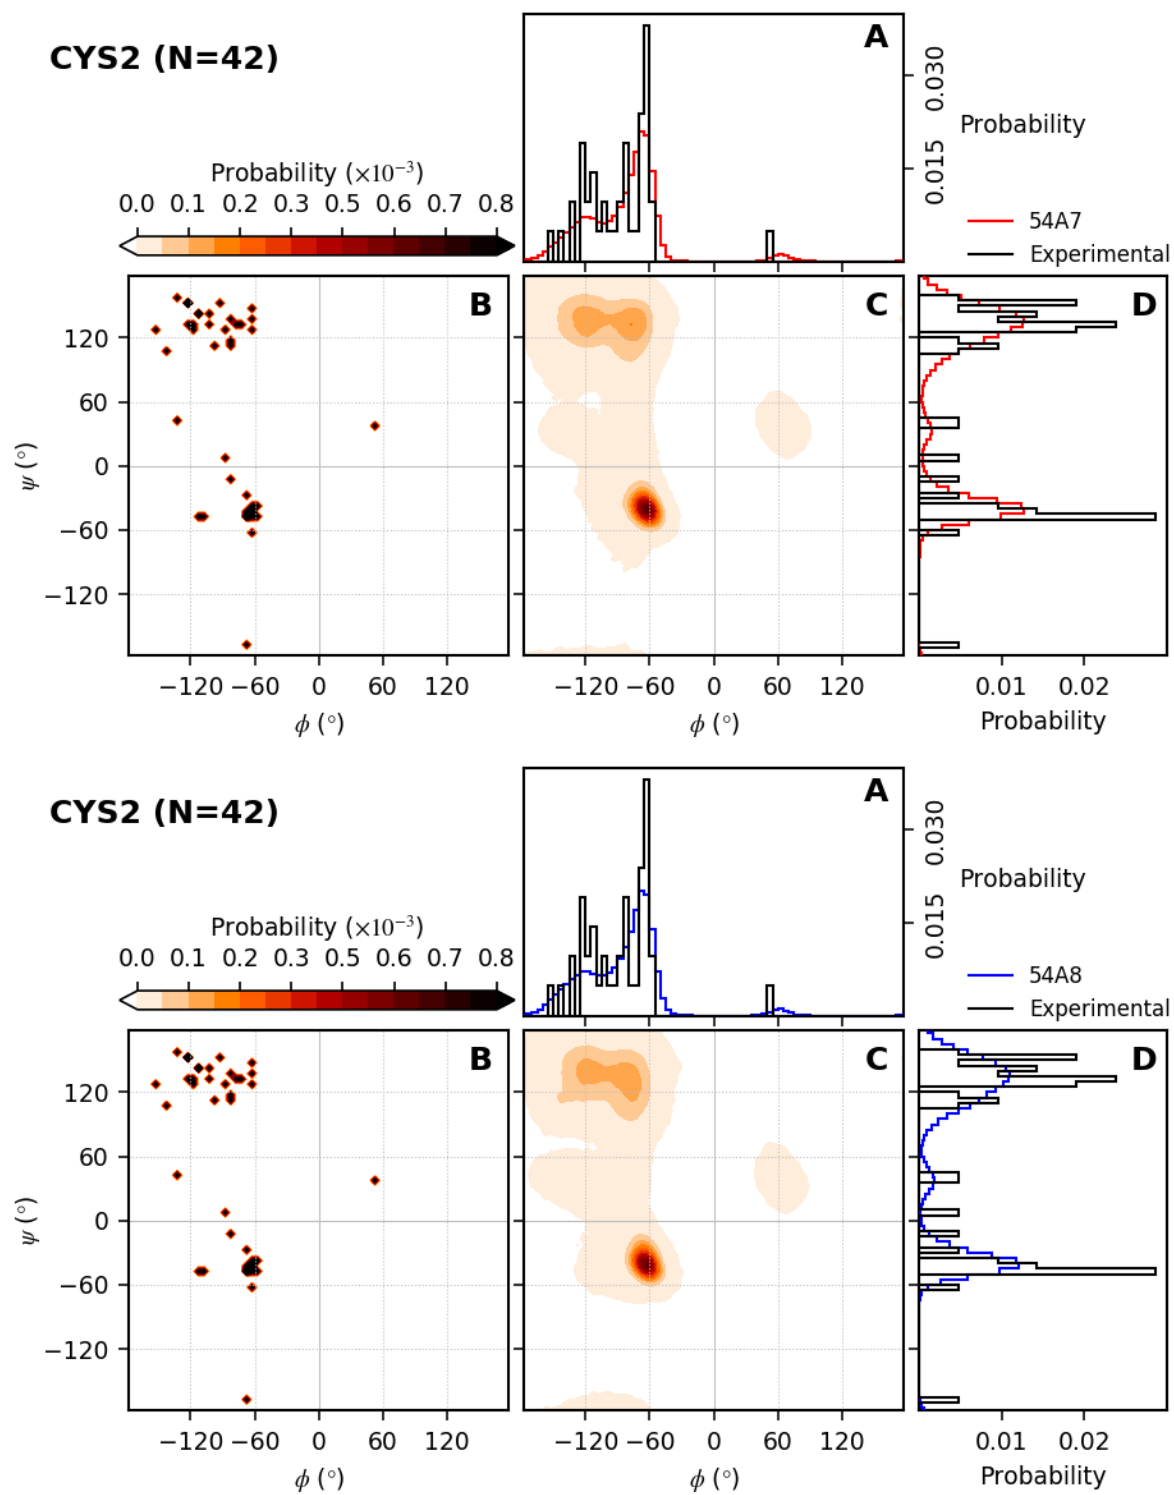

**Figure S7.** Distribution of second cysteine in S-S bridge (CYS2) backbone dihedral angles.

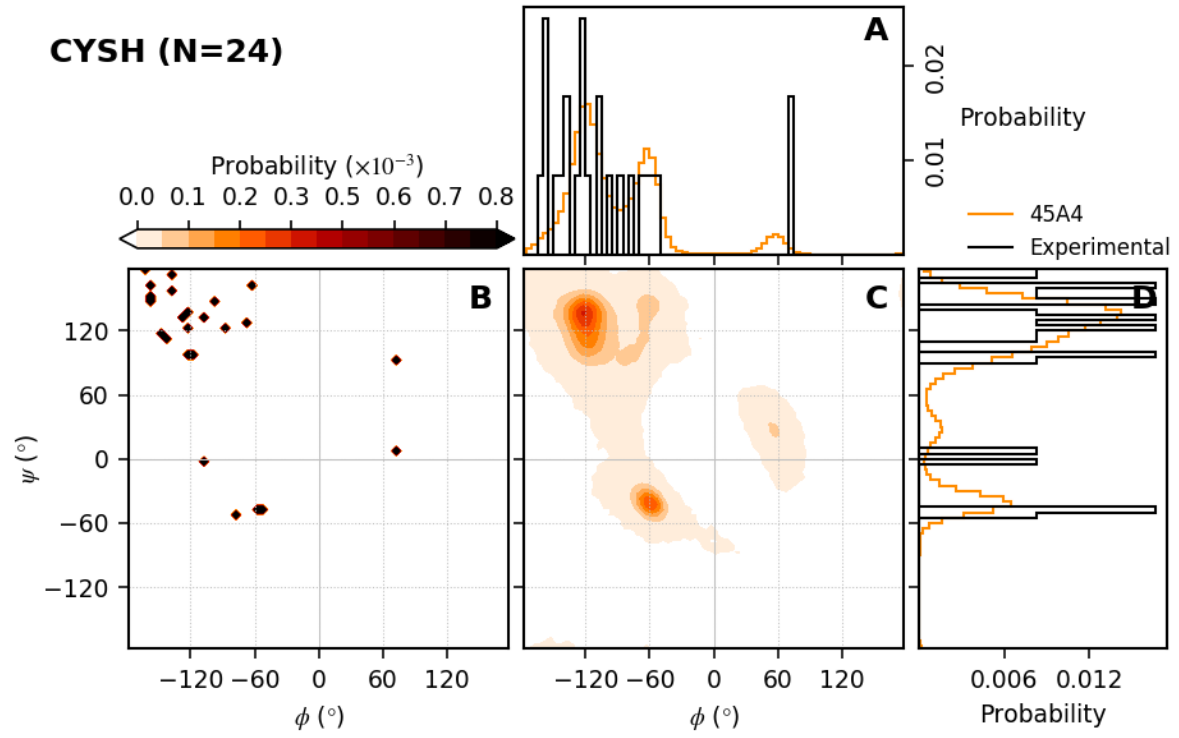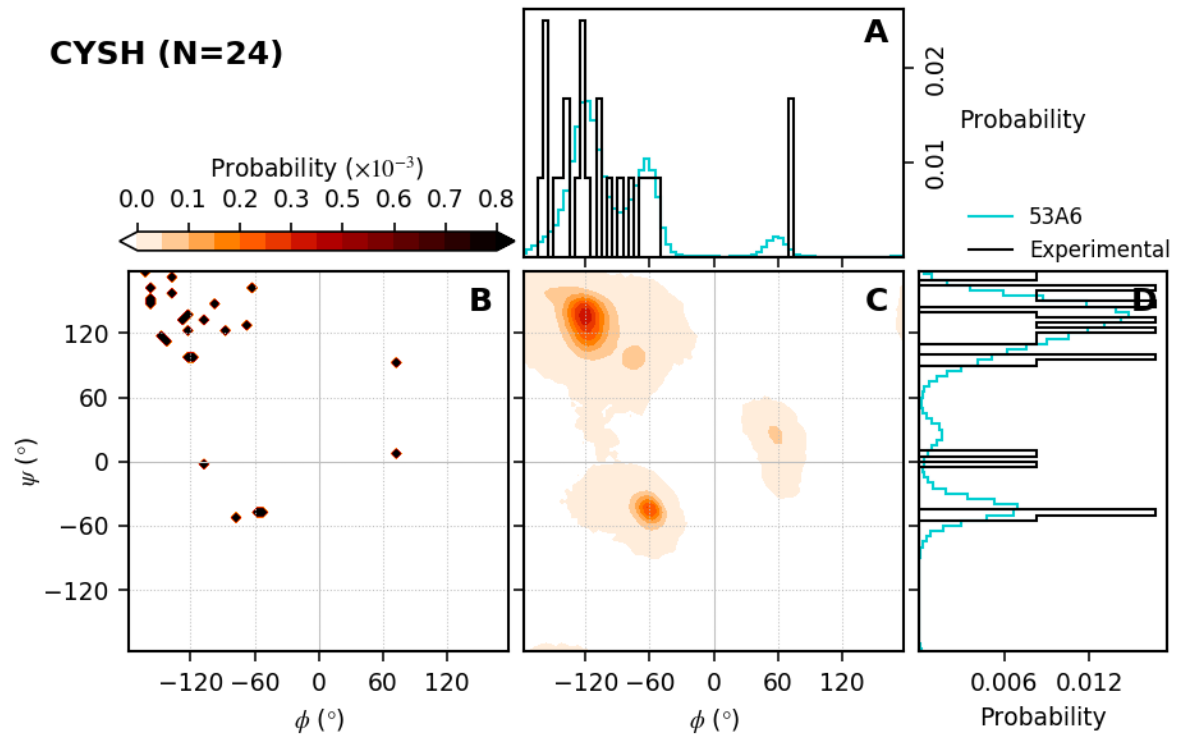

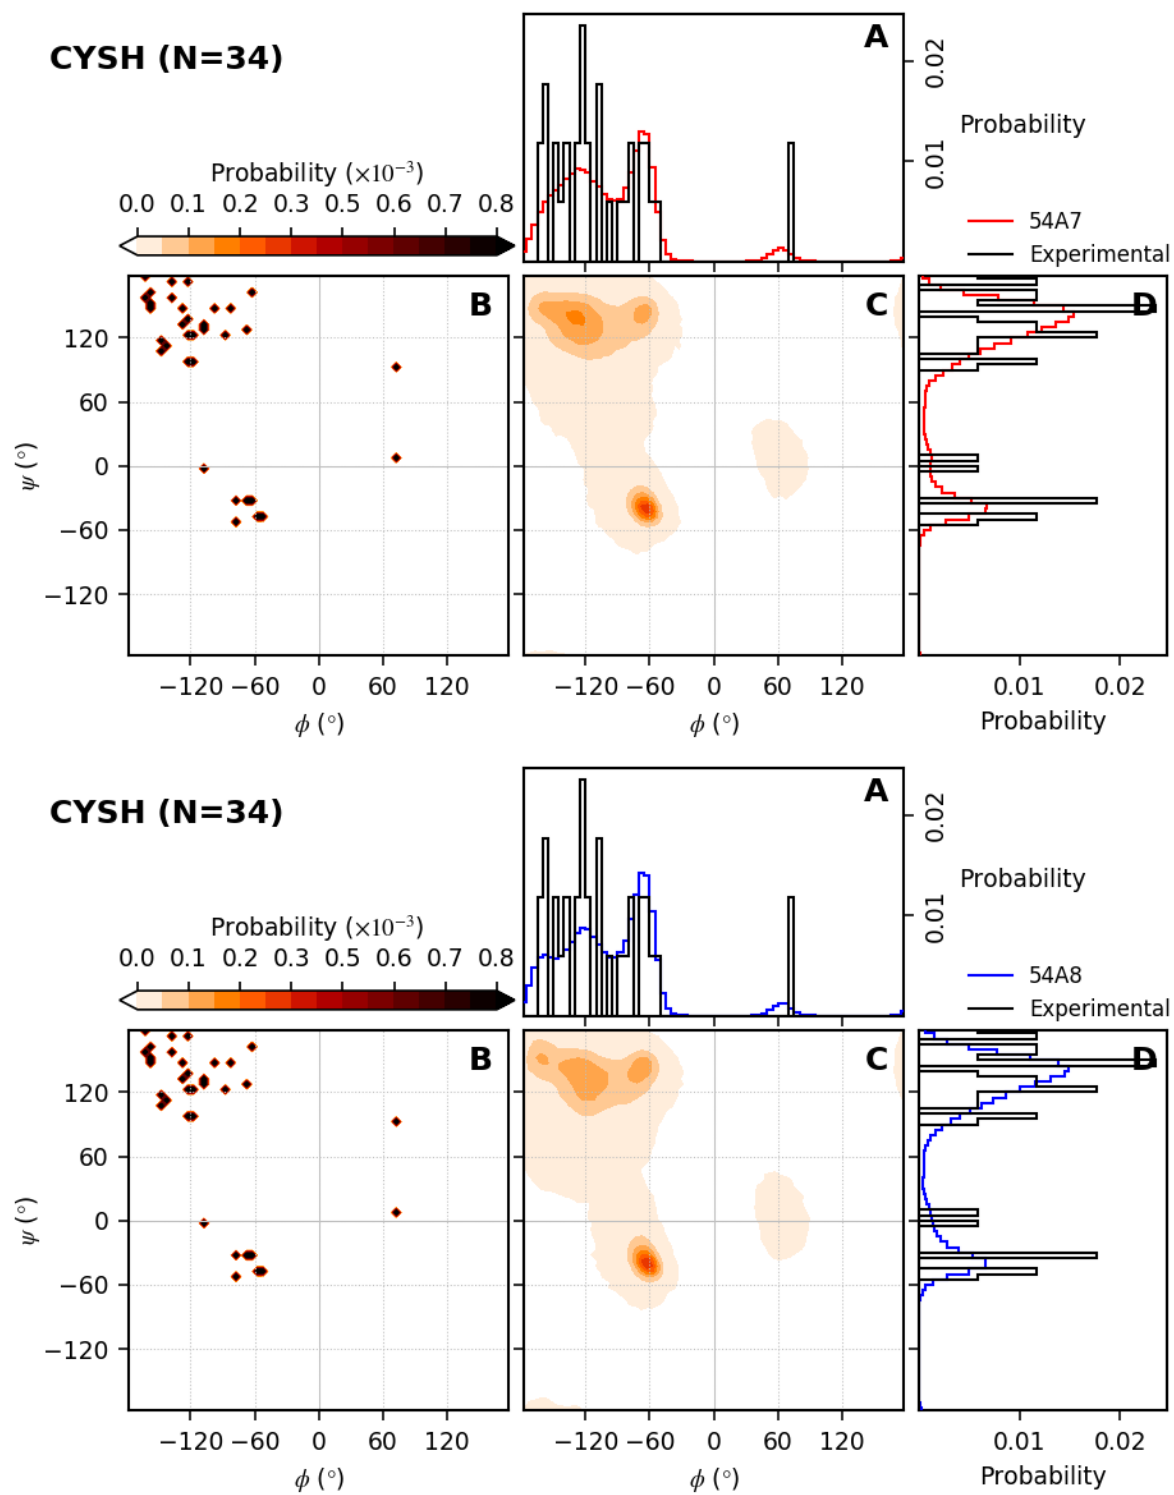

**Figure S8.** Distribution of neutral cysteine (CYSH) backbone dihedral angles.

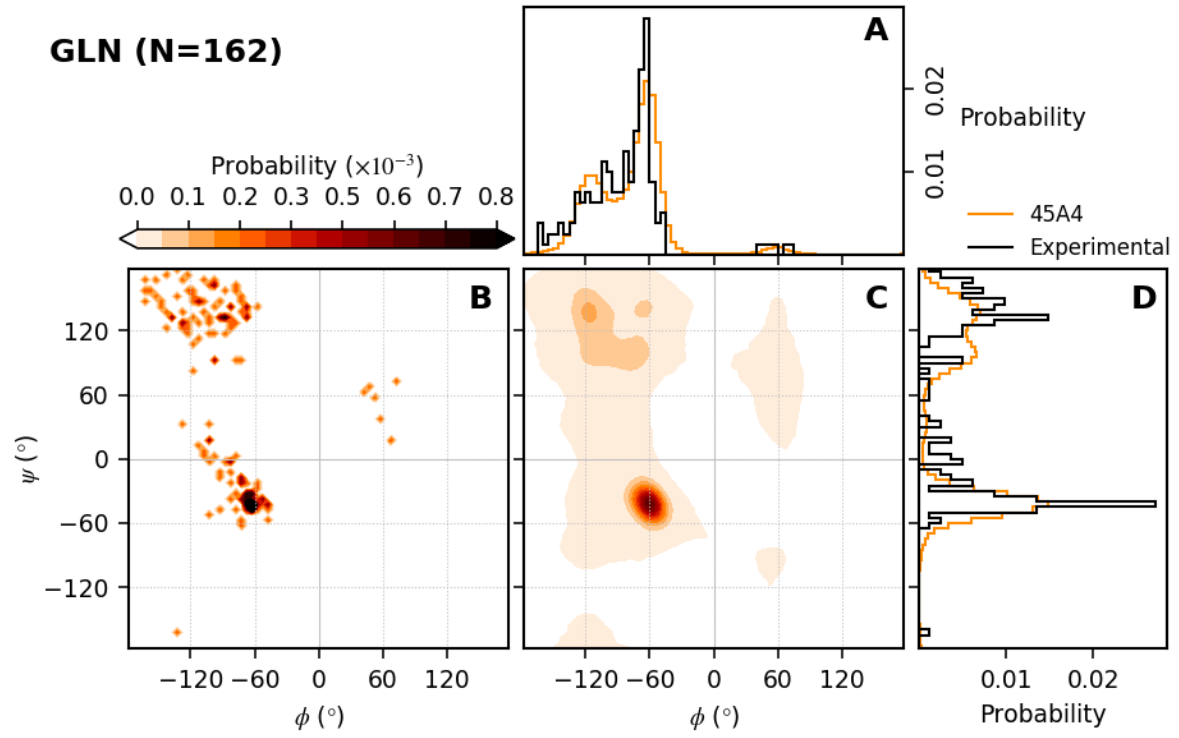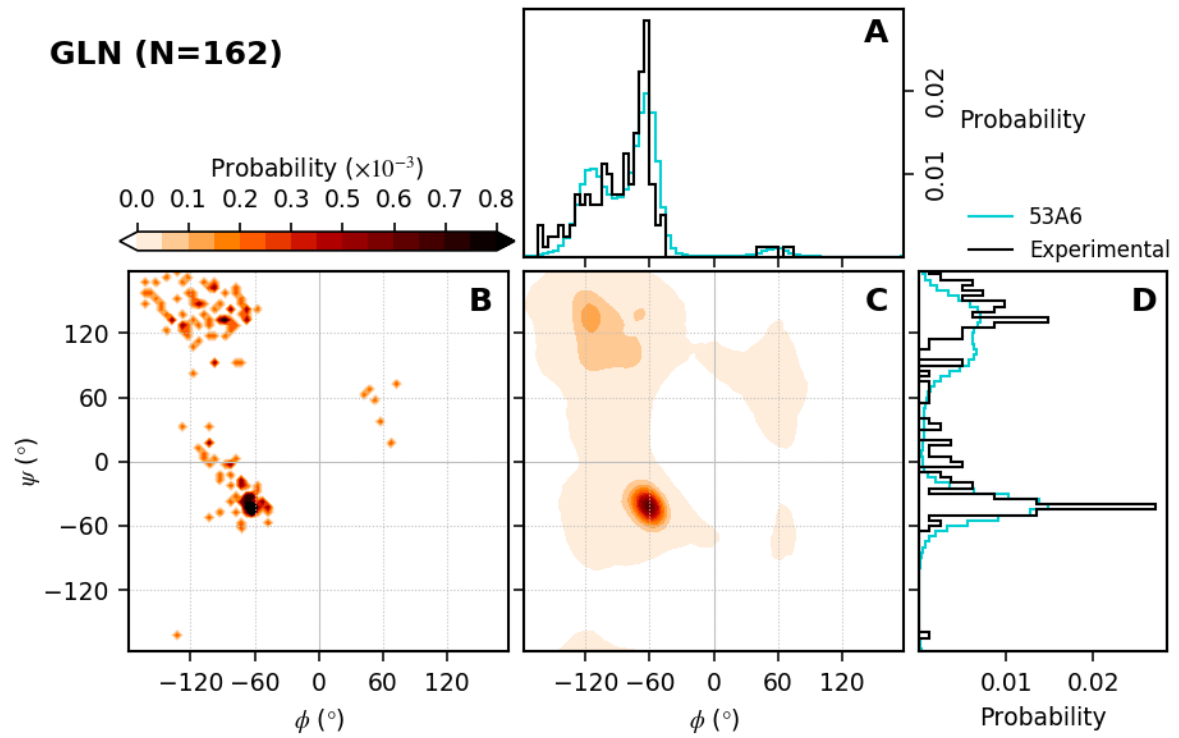



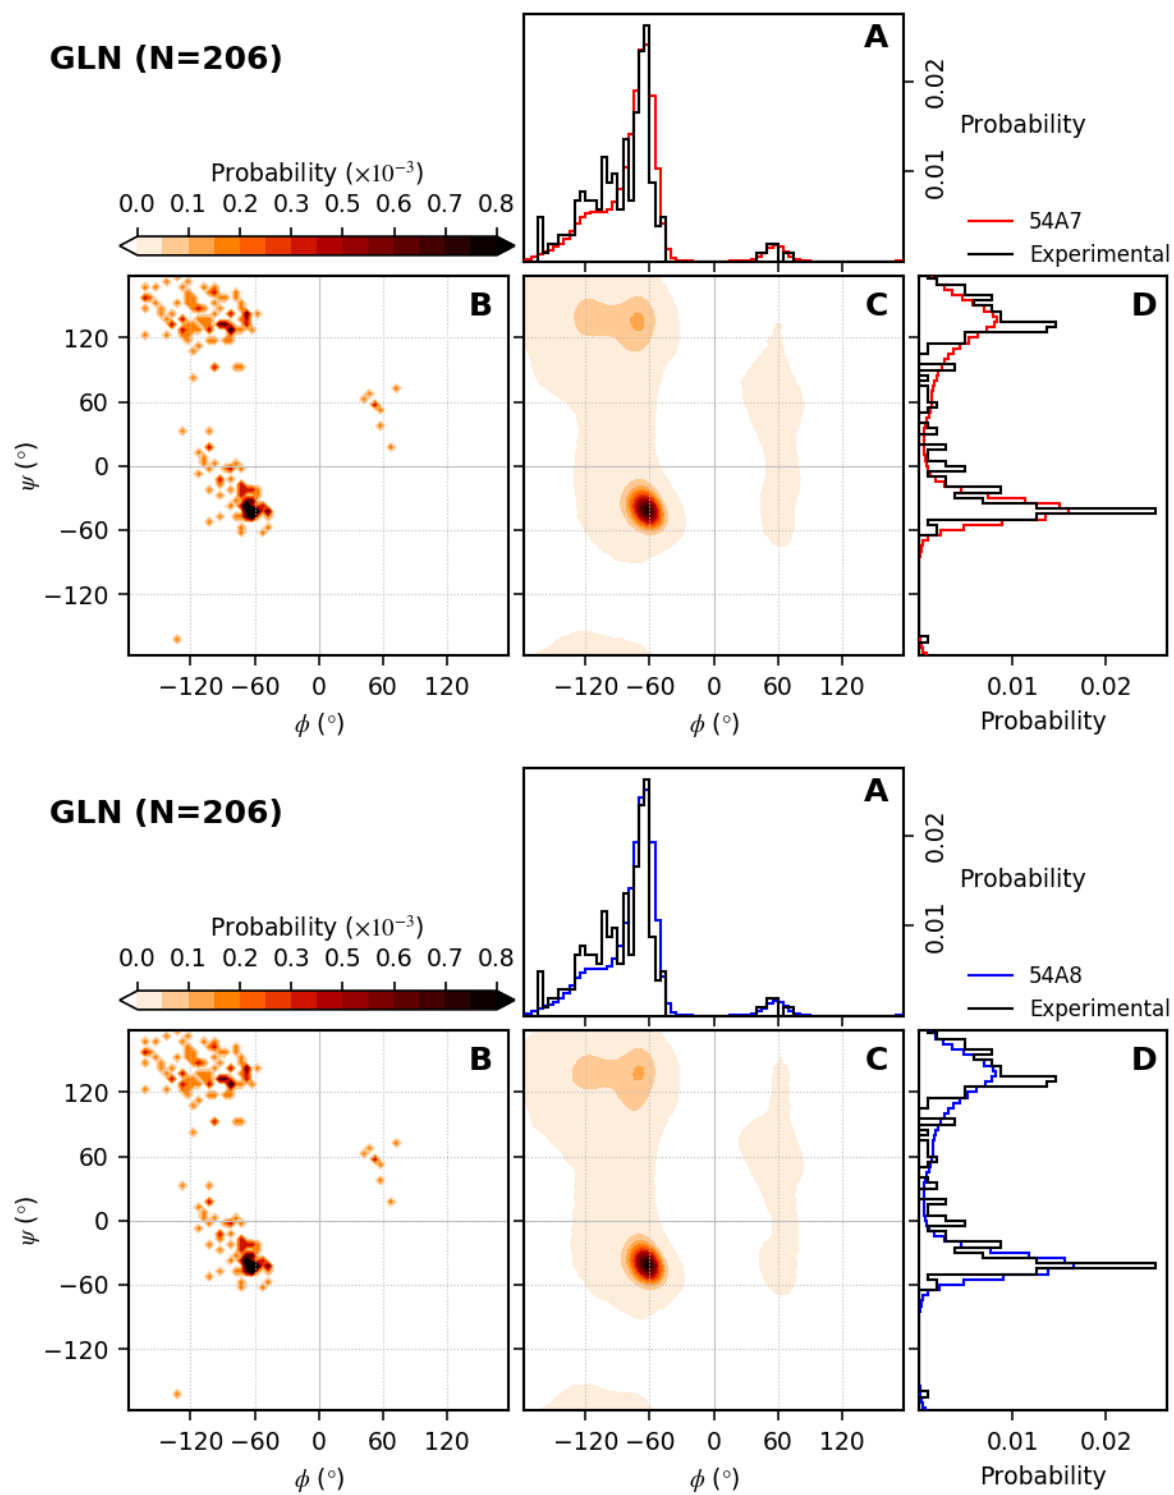

**Figure S9.** Distribution of glutamine (GLN) backbone dihedral angles.

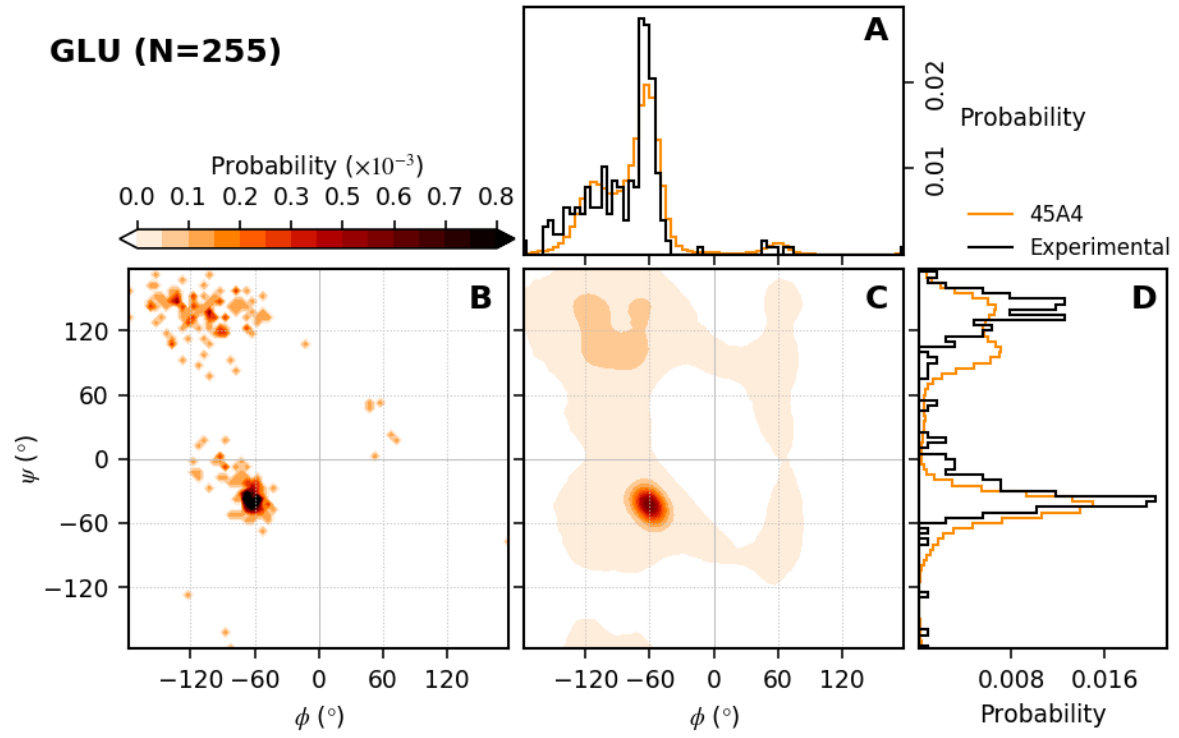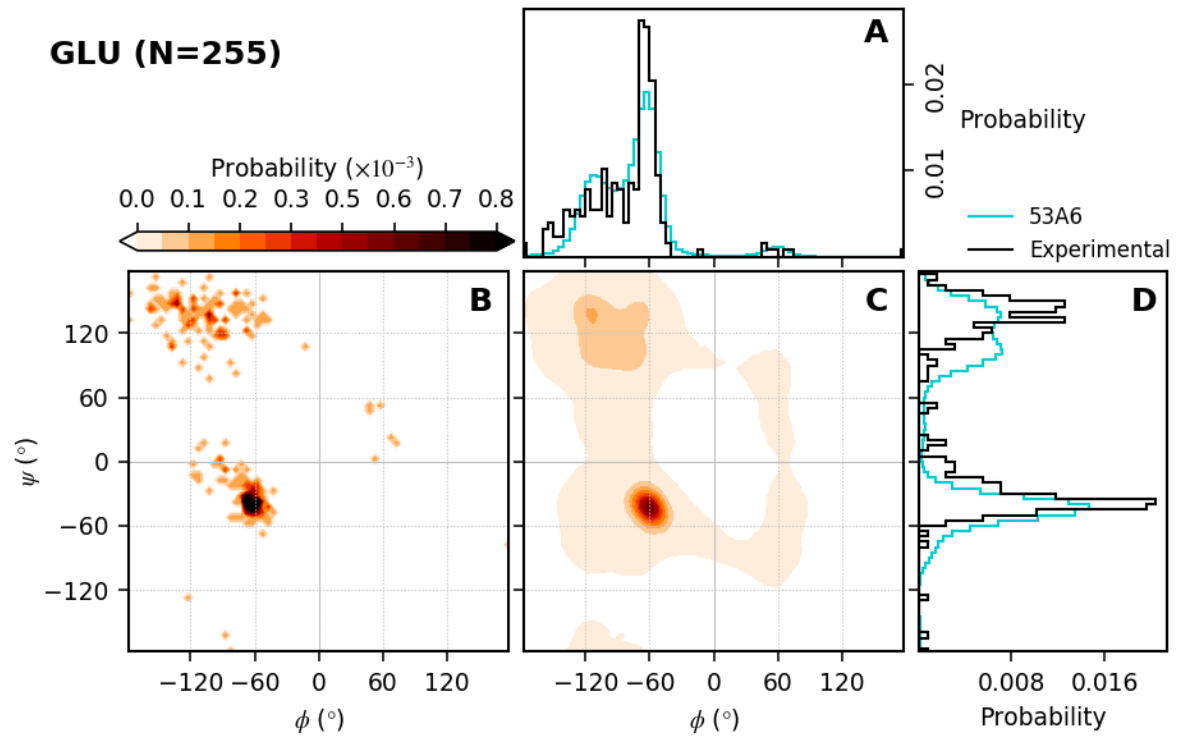

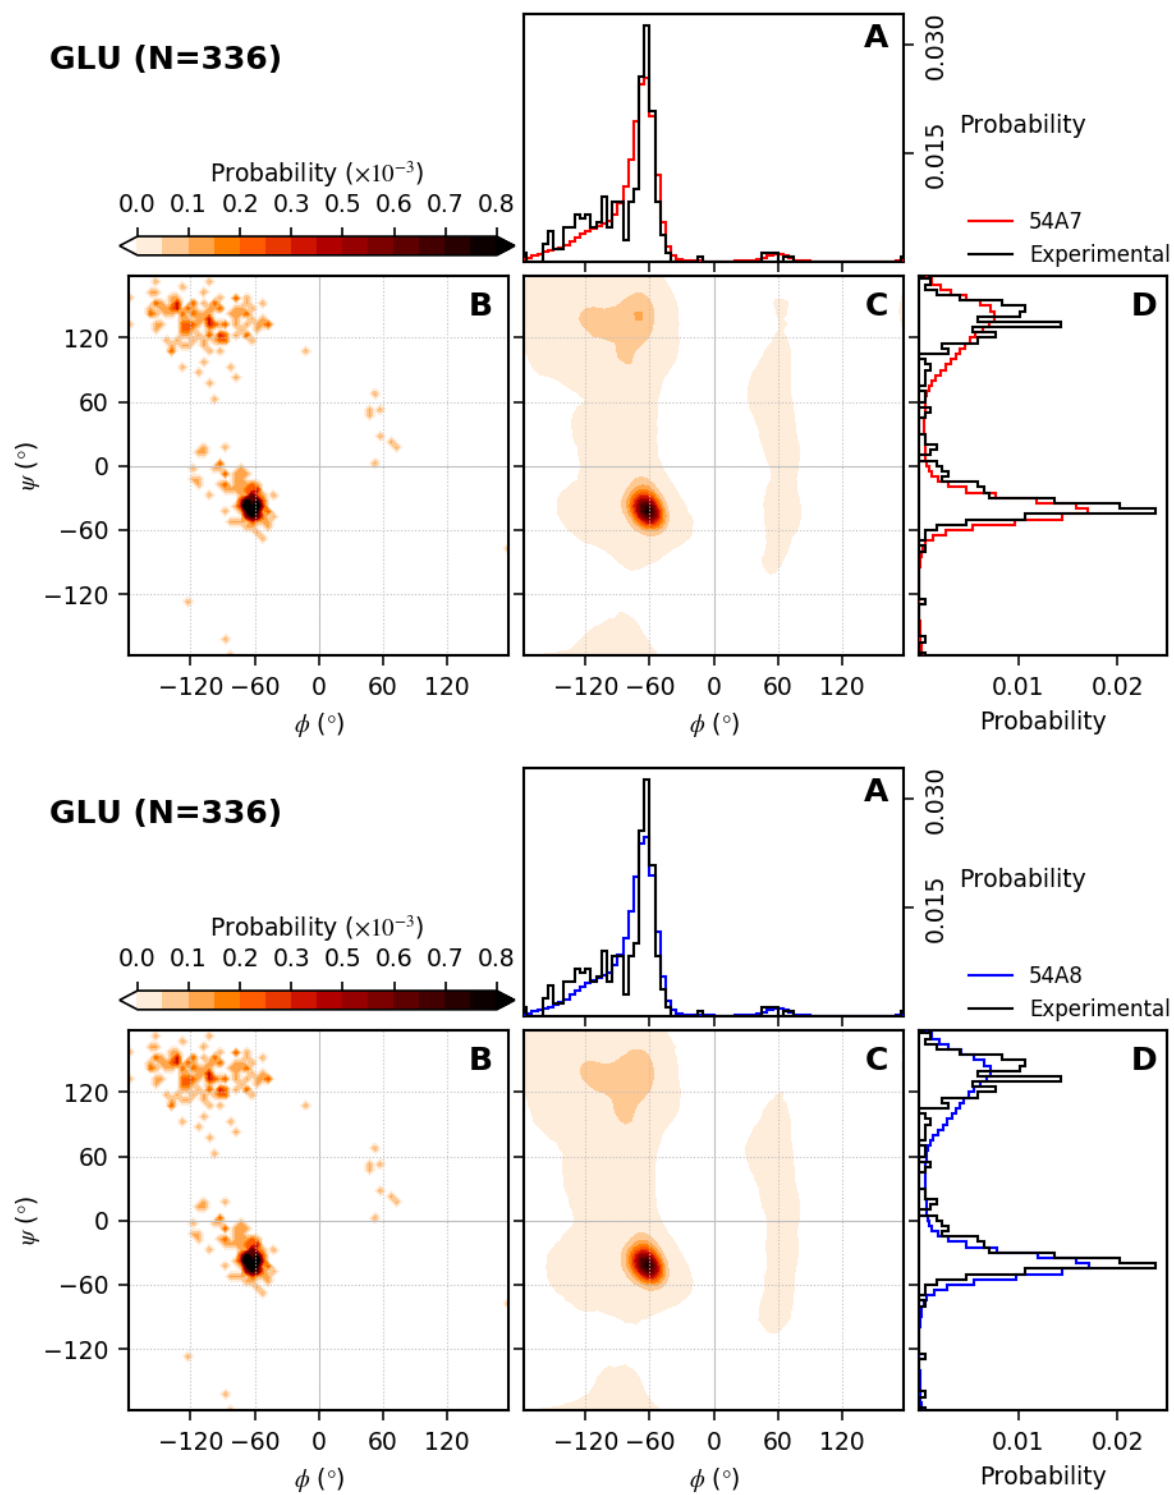

**Figure S10.** Distribution of glutamic acid (GLU) backbone dihedral angles.

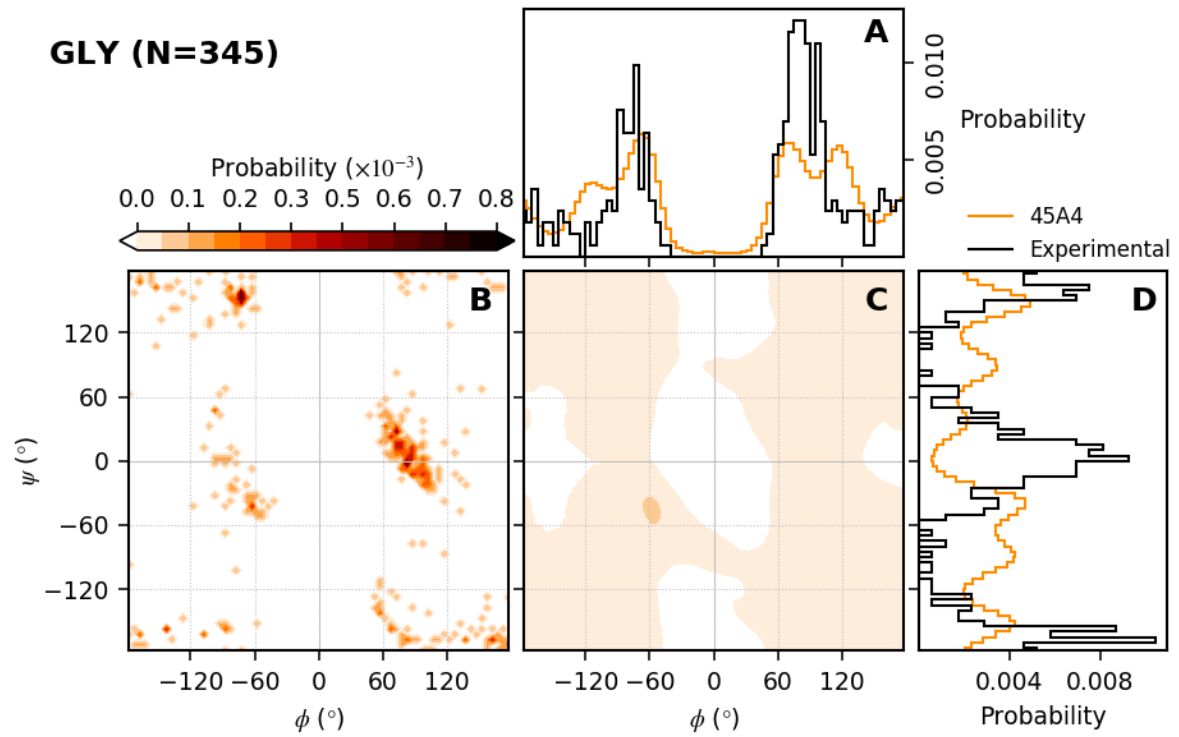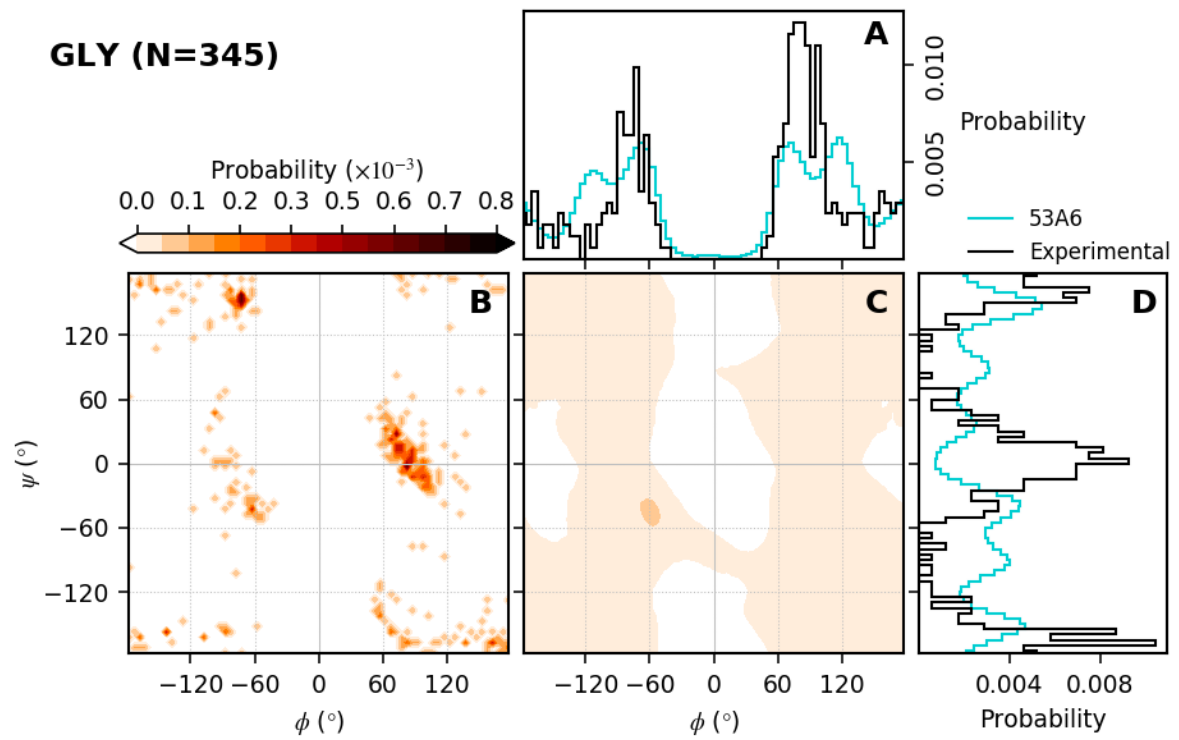

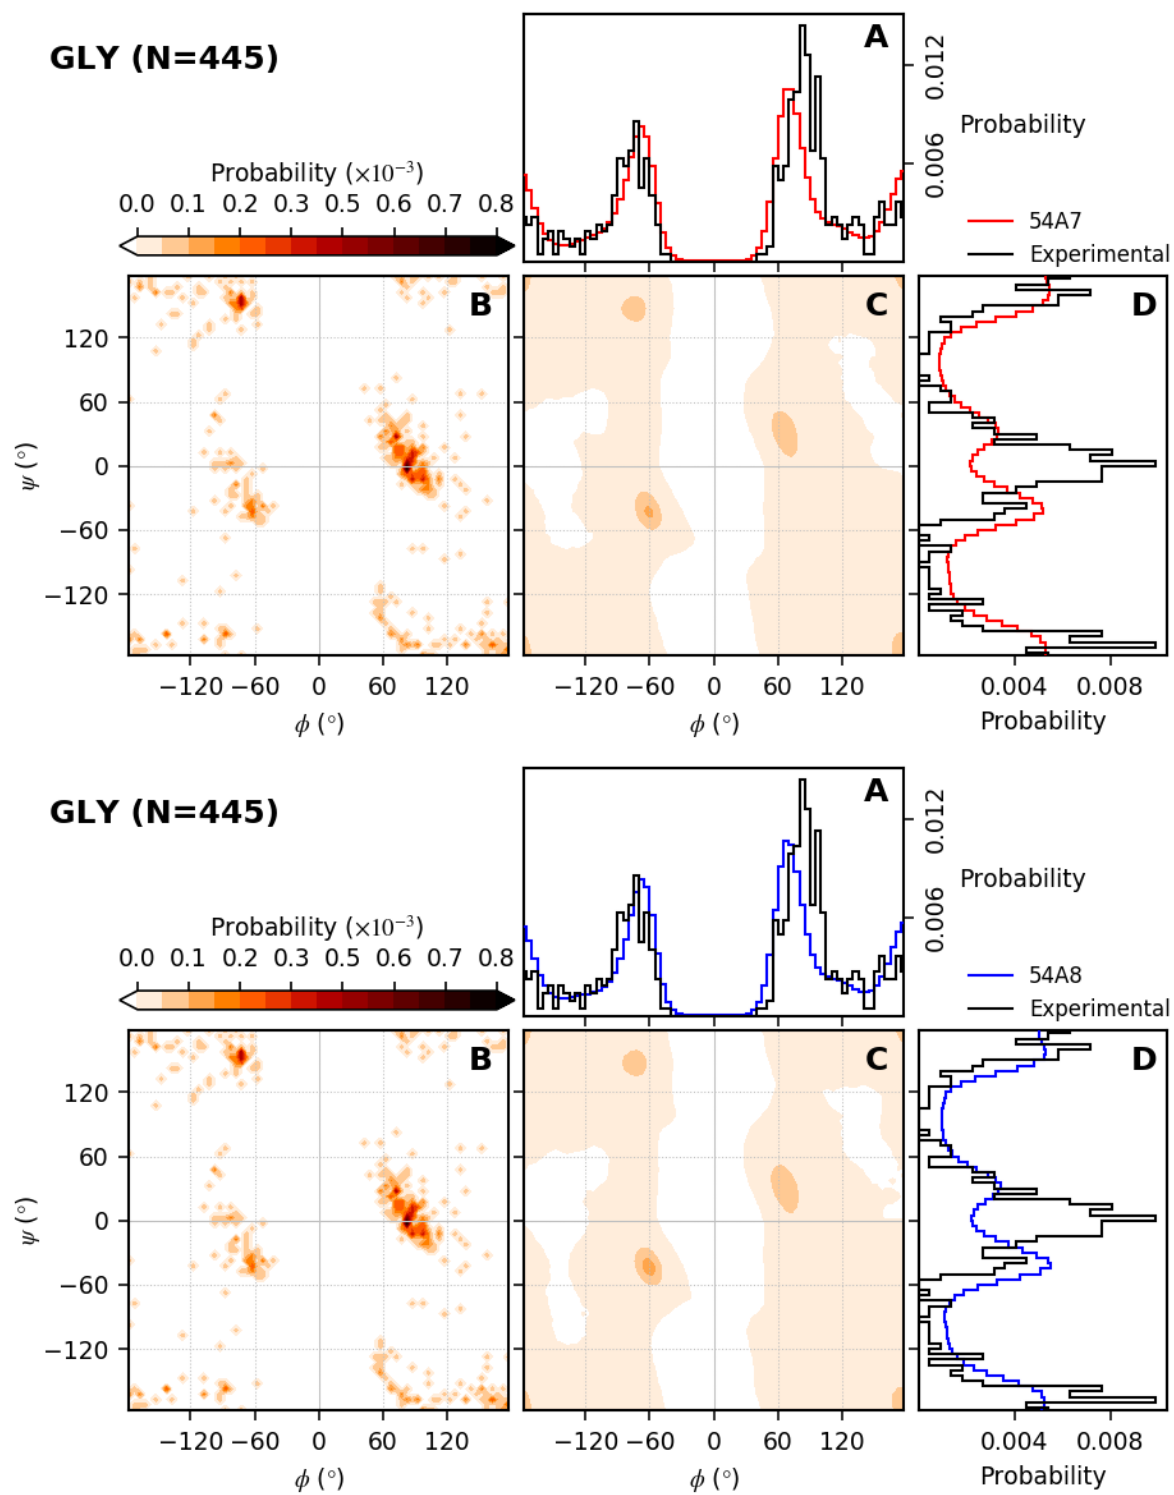

**Figure S11.** Distribution of glycine (GLY) backbone dihedral angles.

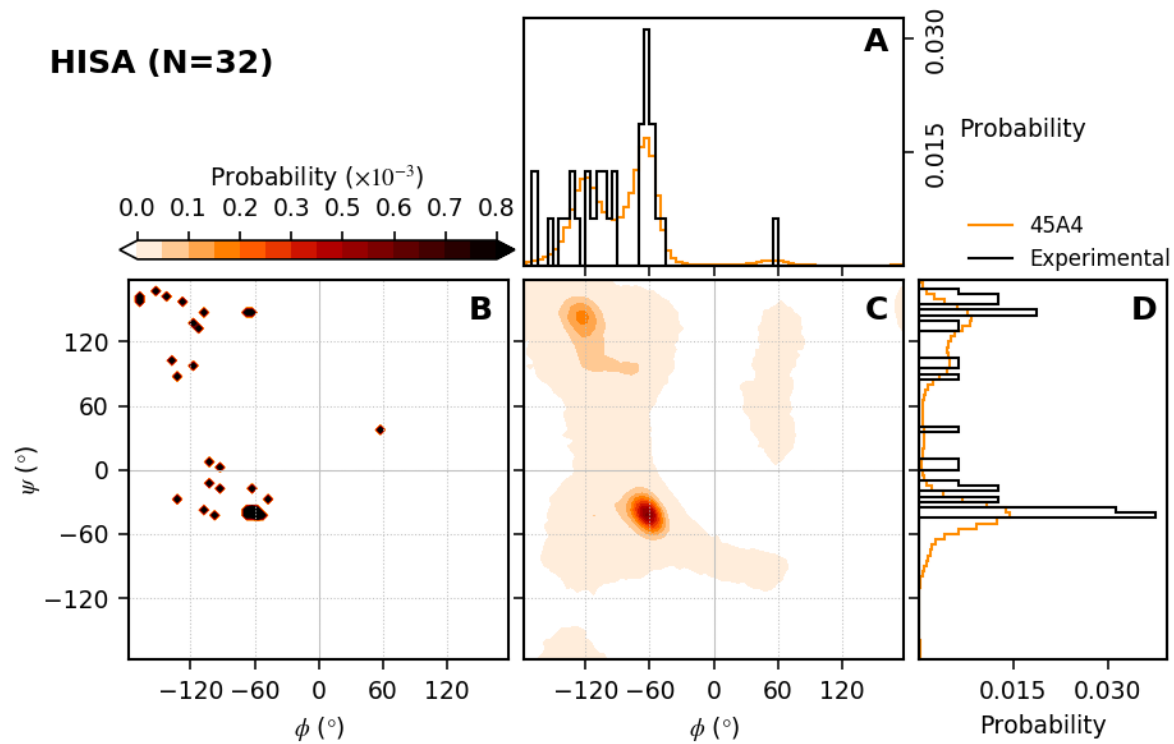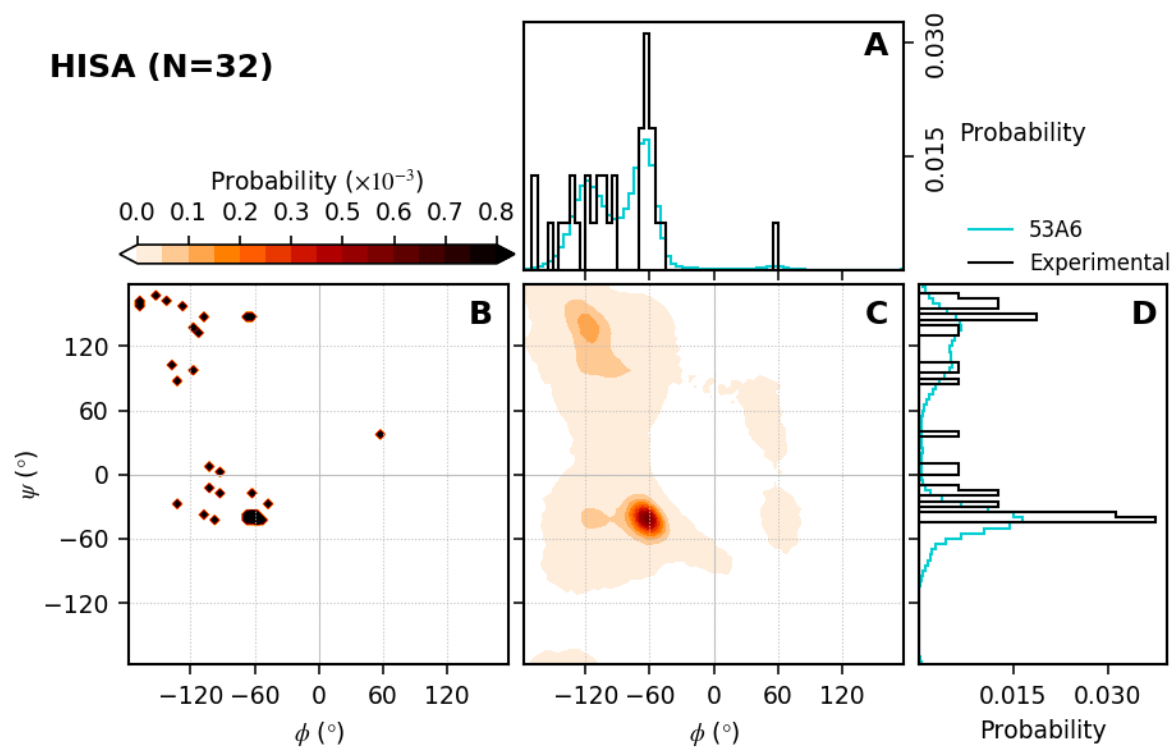

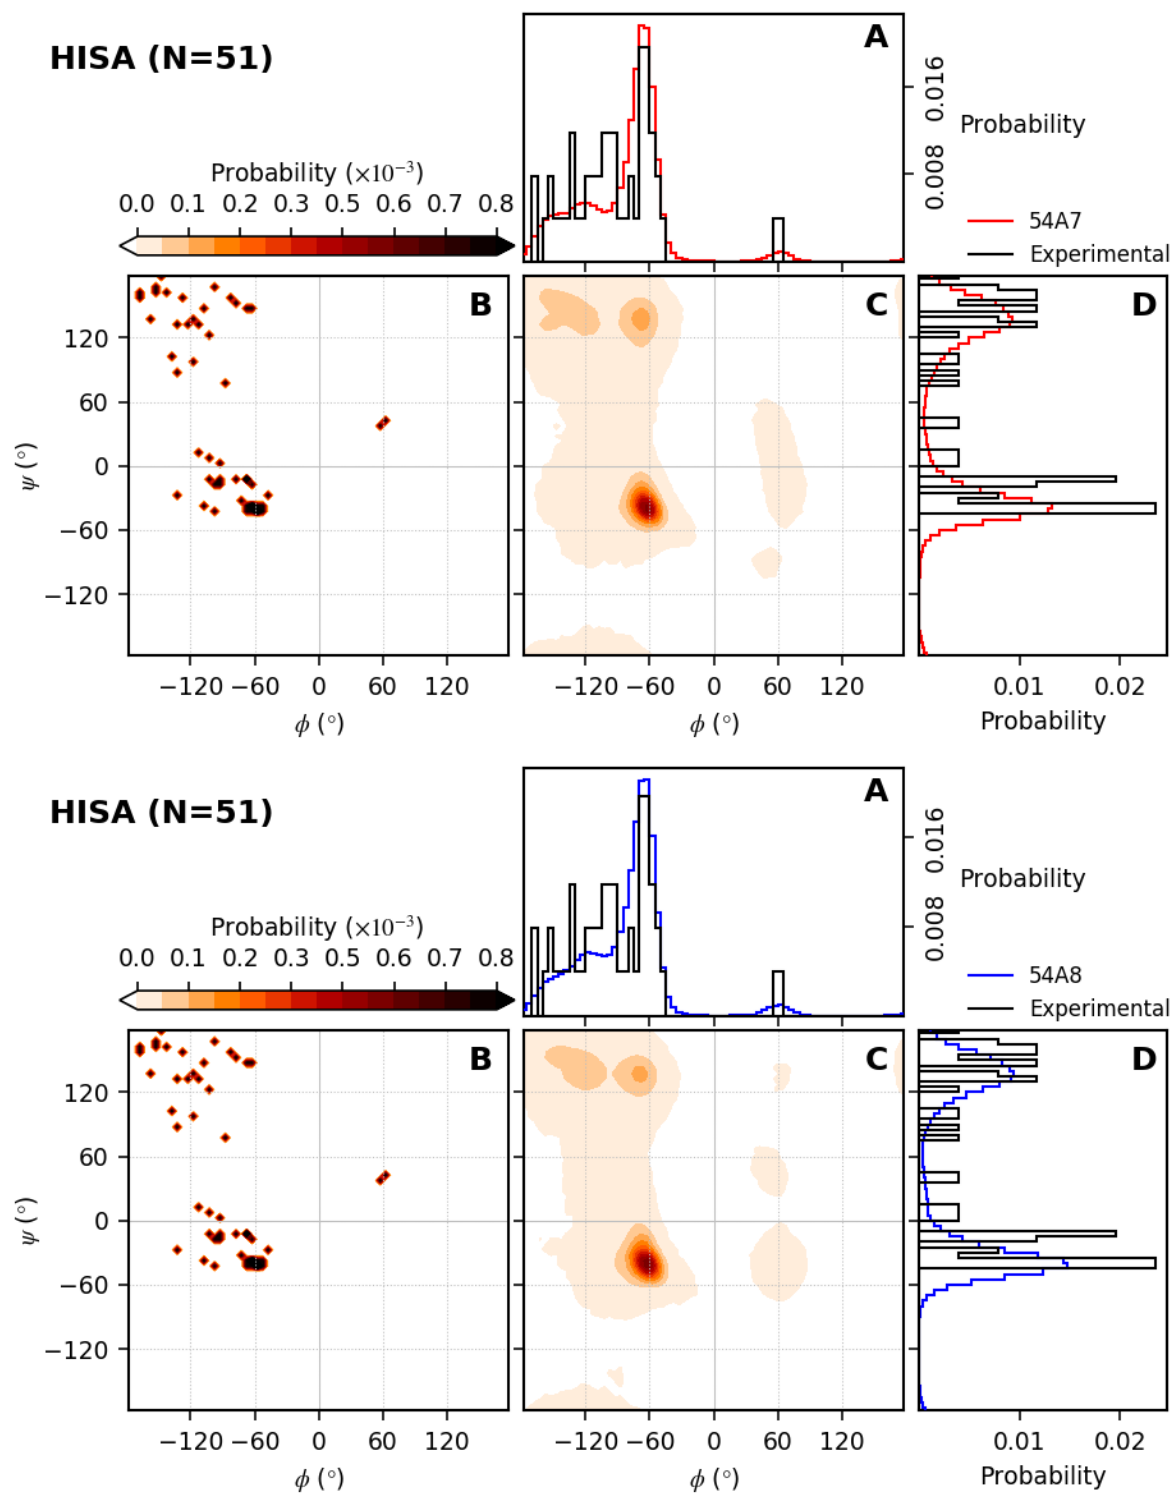

**Figure S12.** Distribution of histidine protonated at ND1 (HISA) backbone dihedral angles.

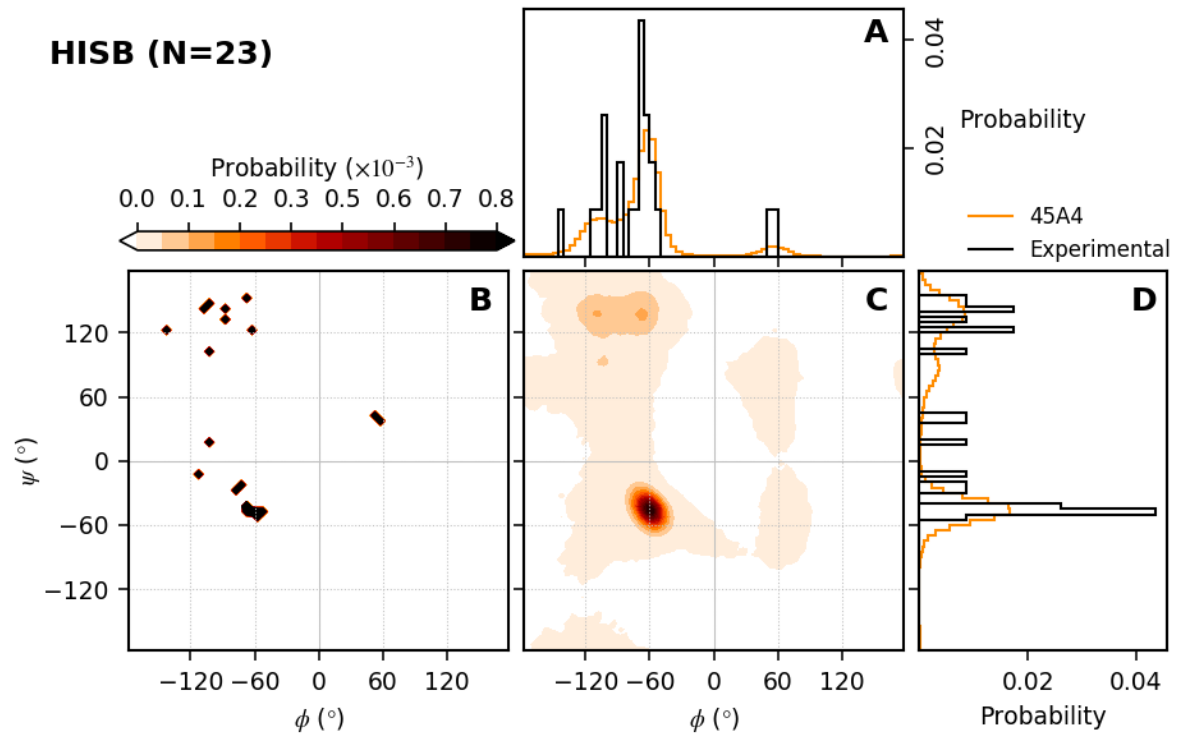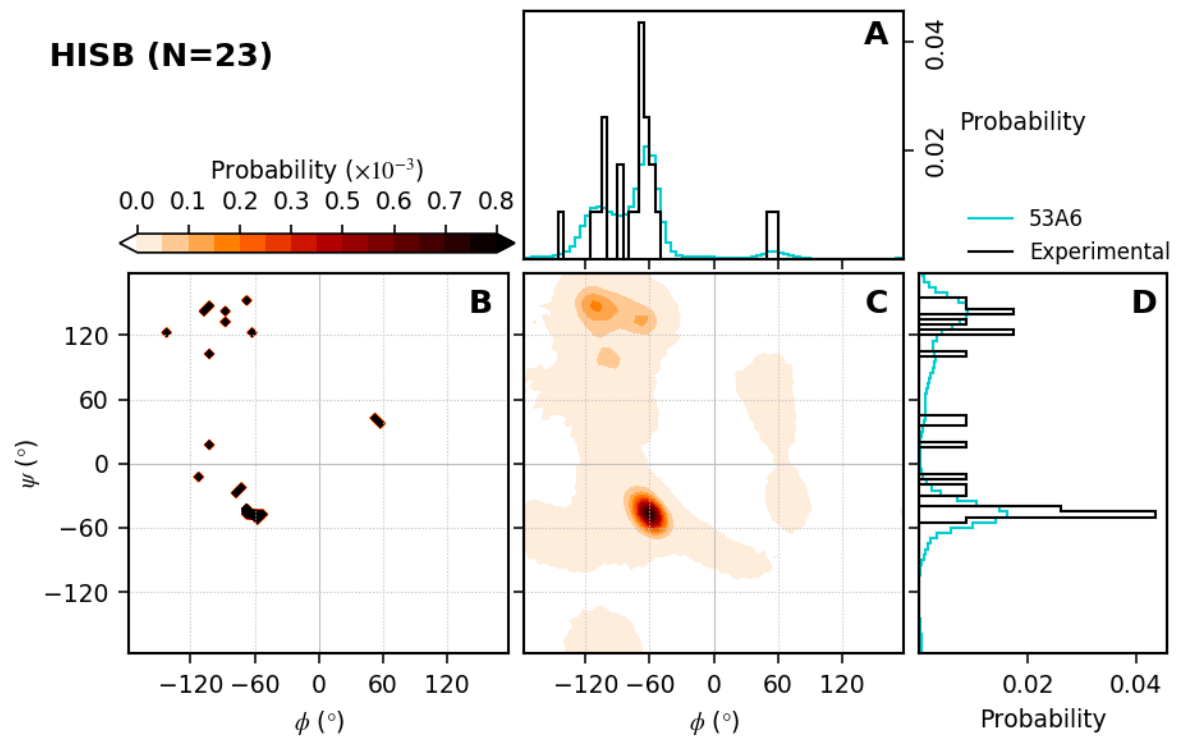



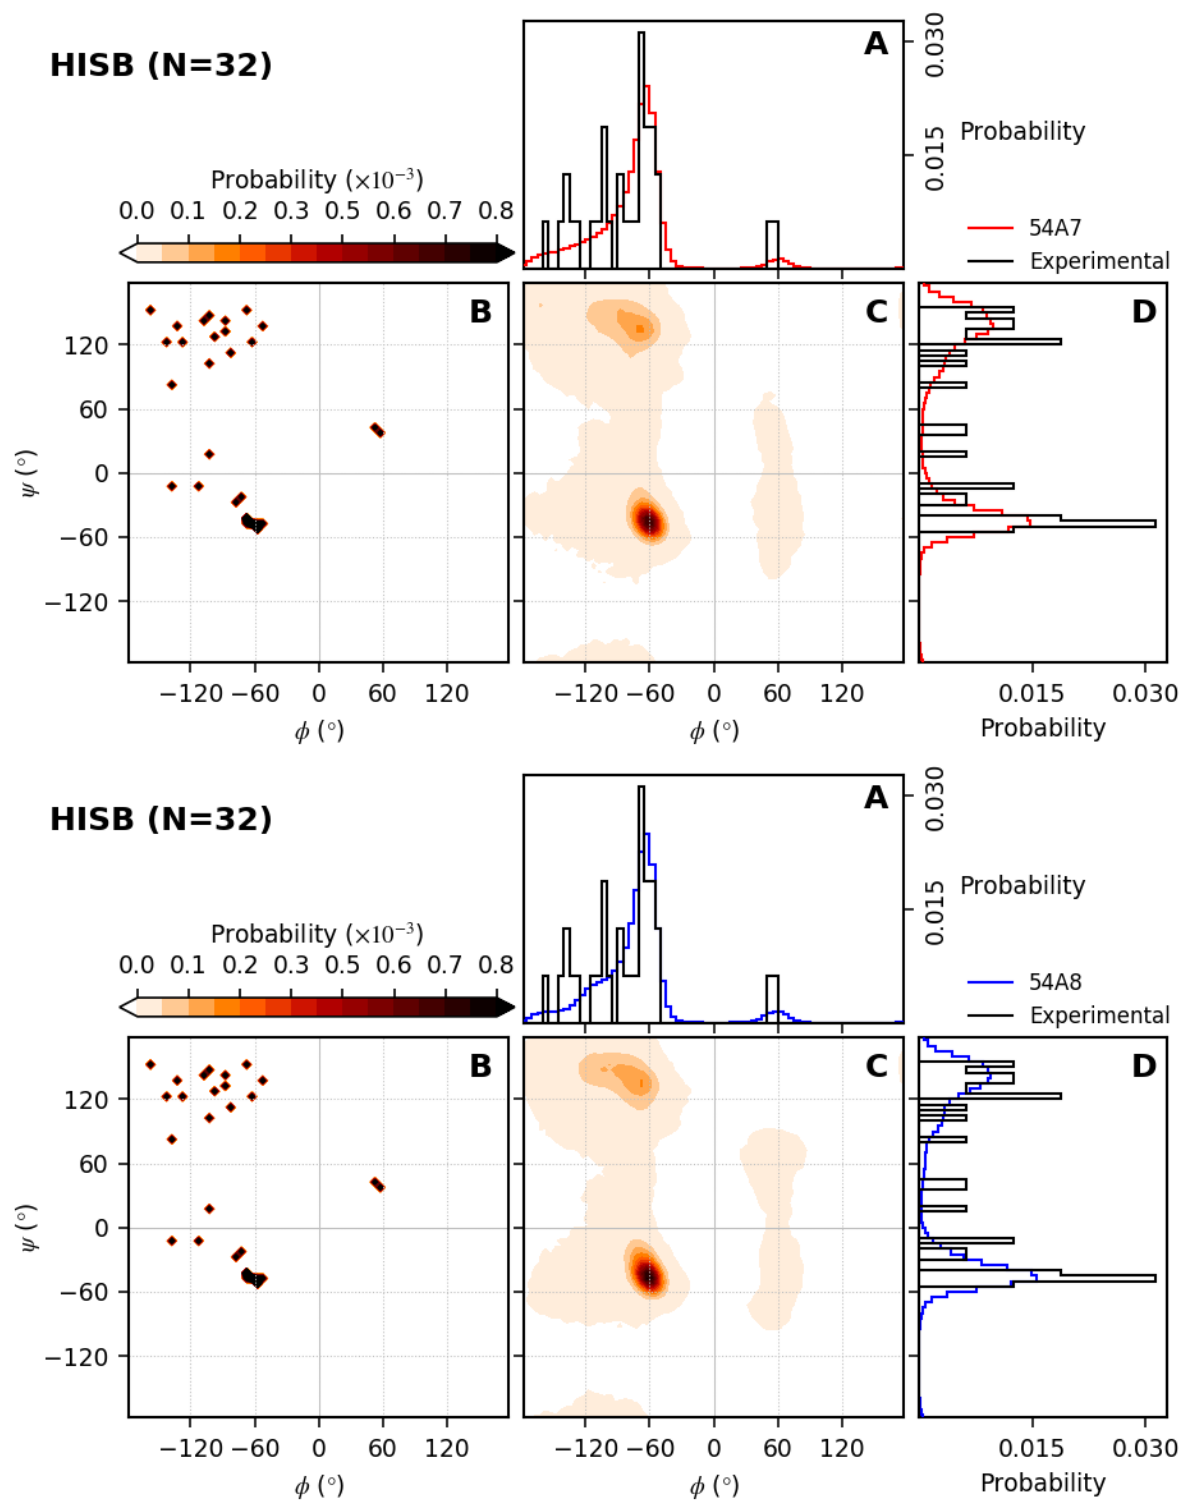

**Figure S13.** Distribution of histidine protonated at NE2 (HISB) backbone dihedral angles.

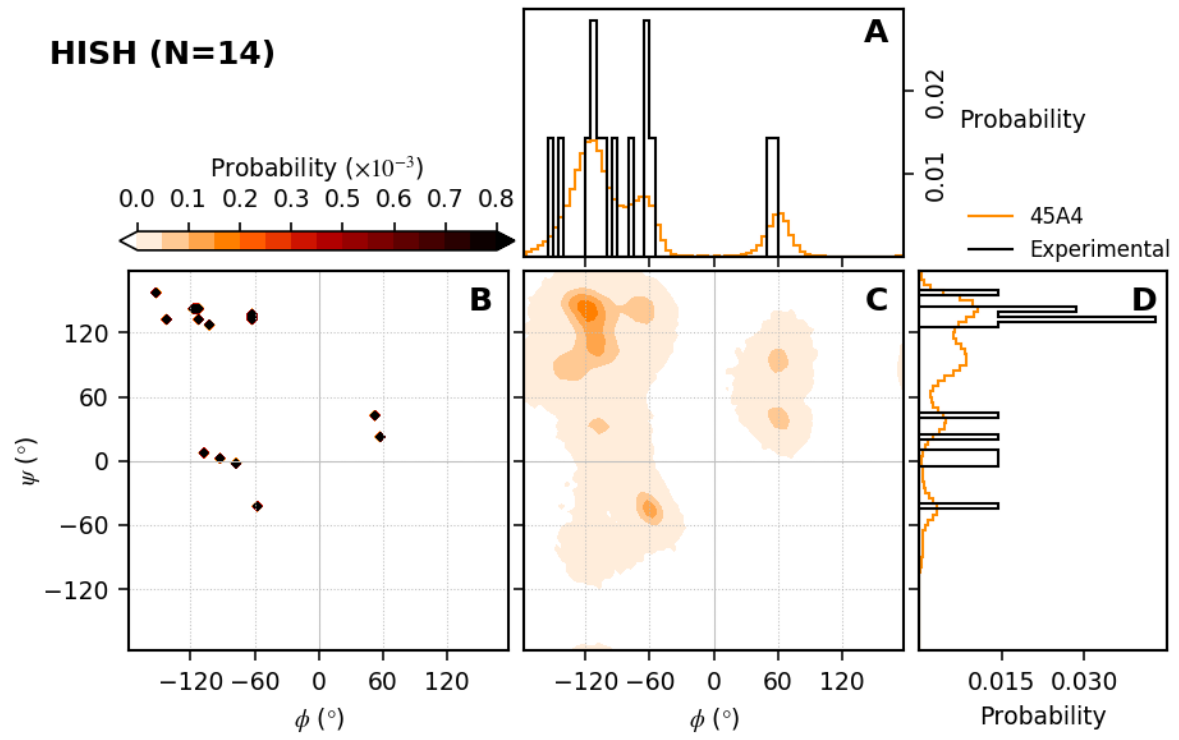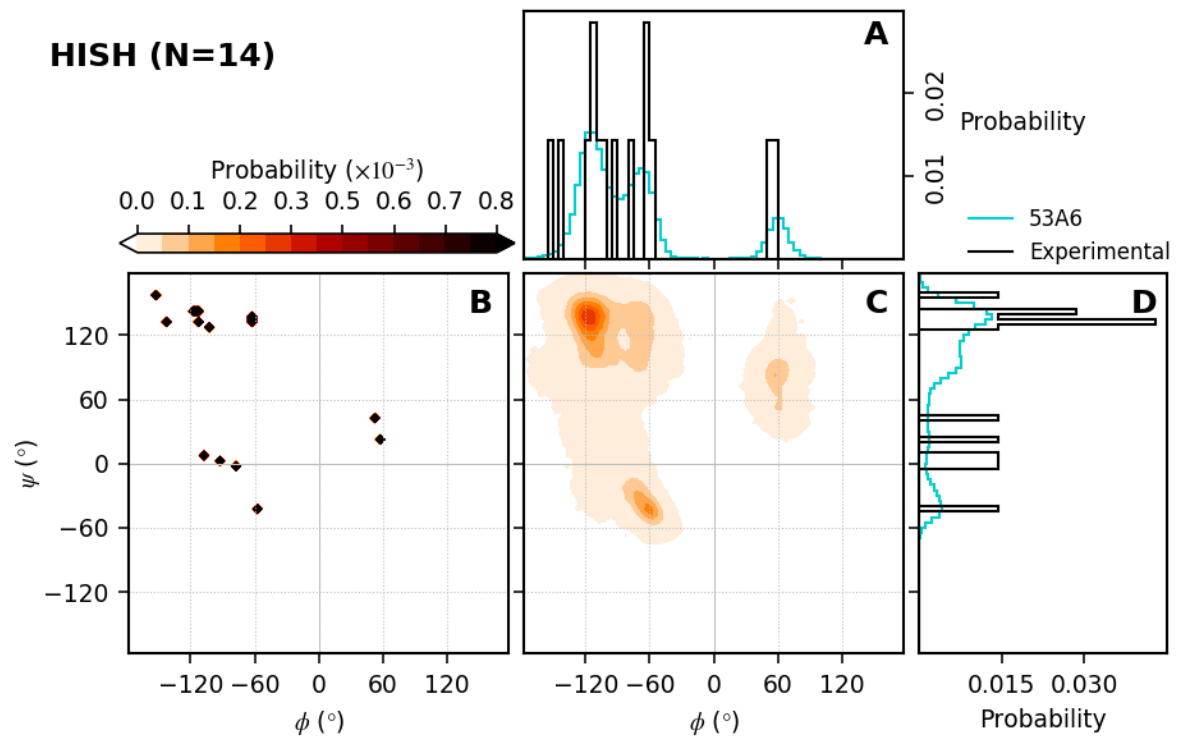

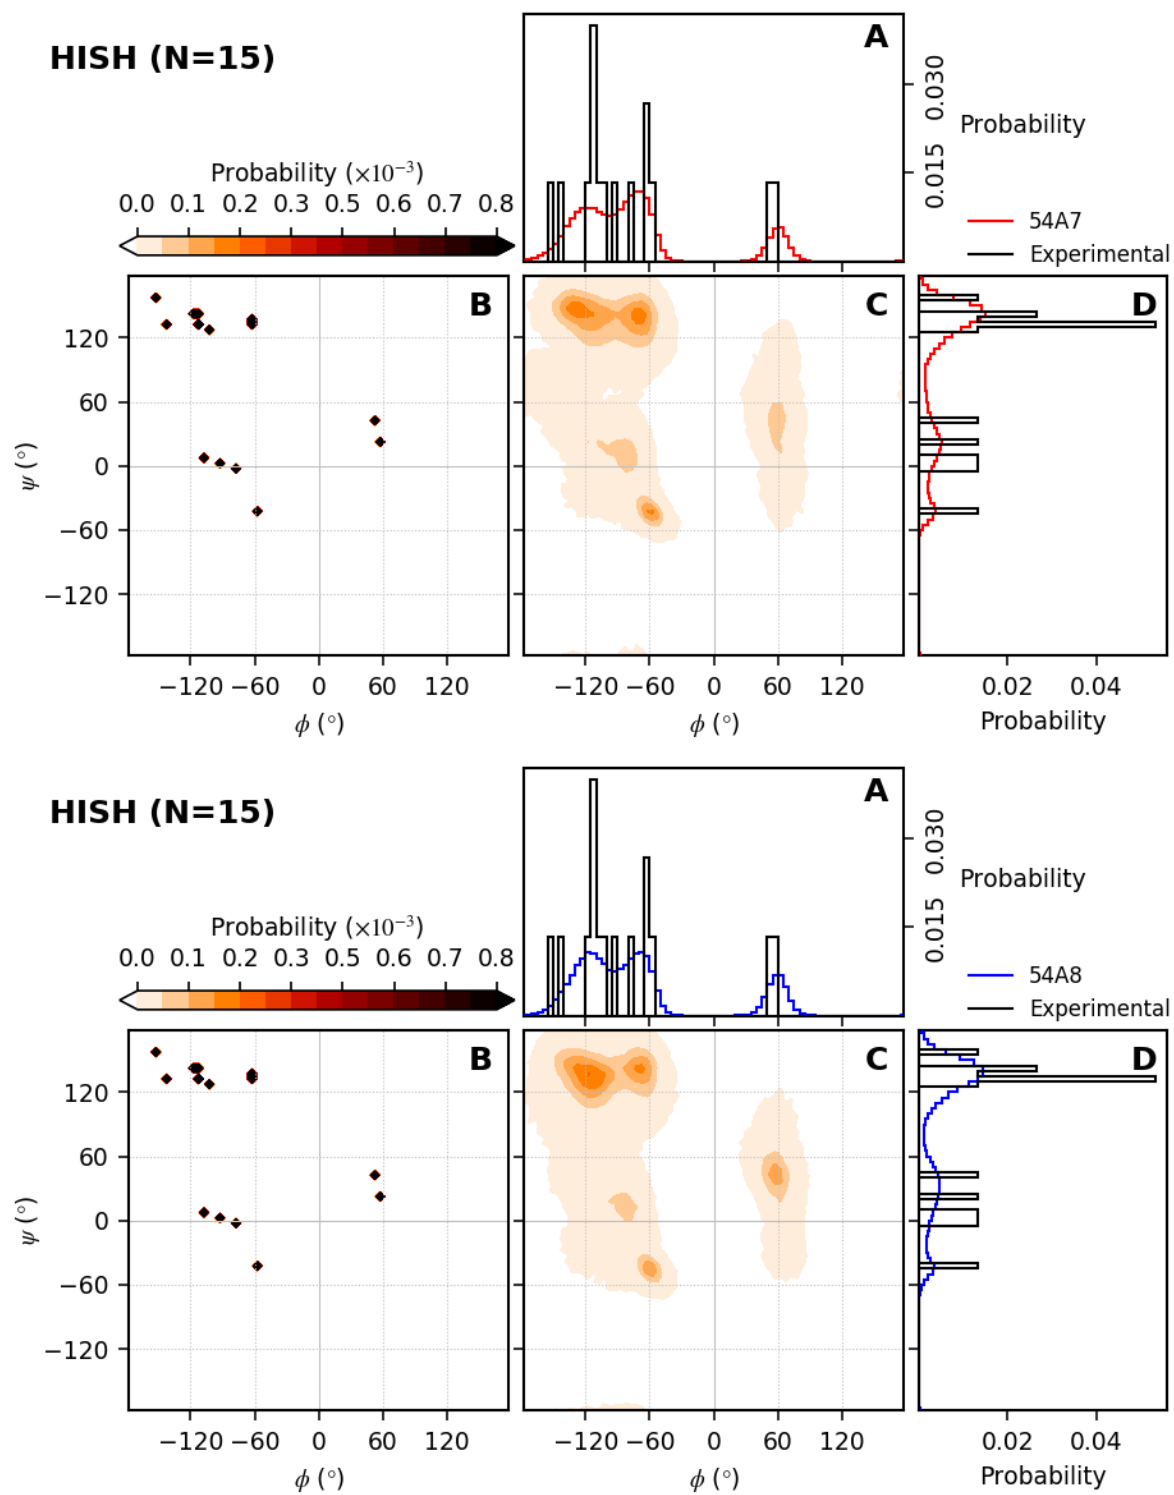

**Figure S14.** Distribution of histidine with +1 formal charge (HISH) backbone dihedral angles.

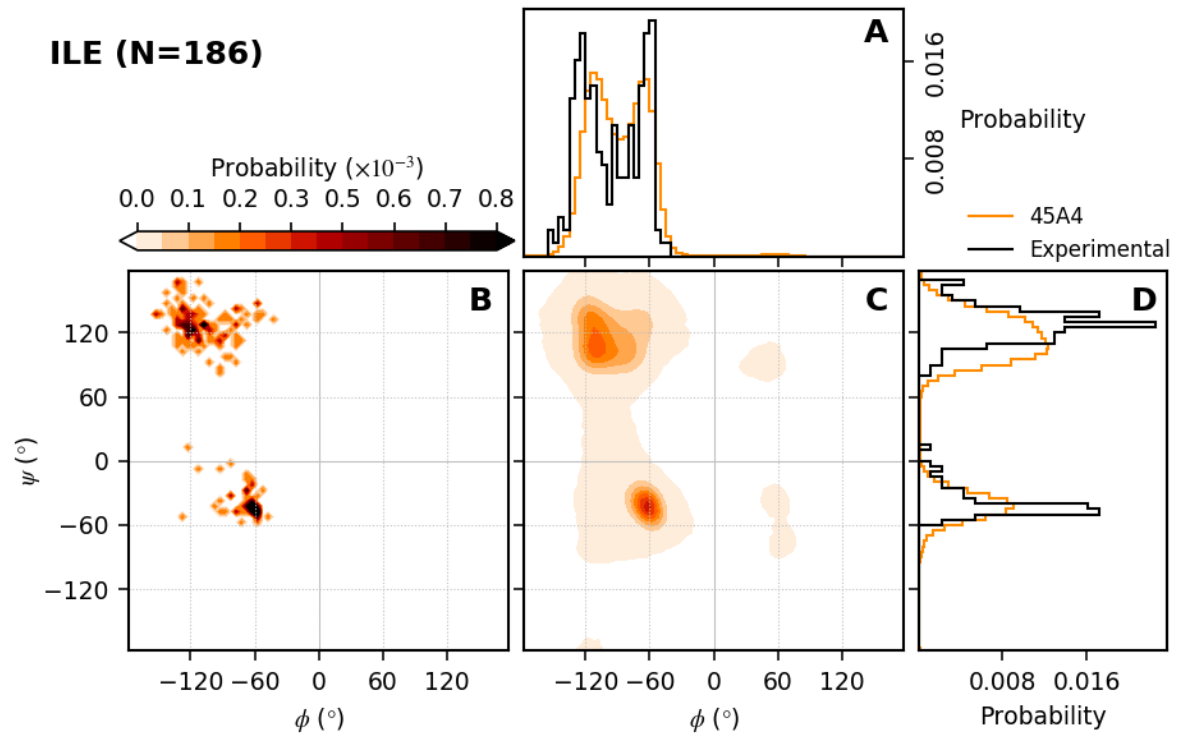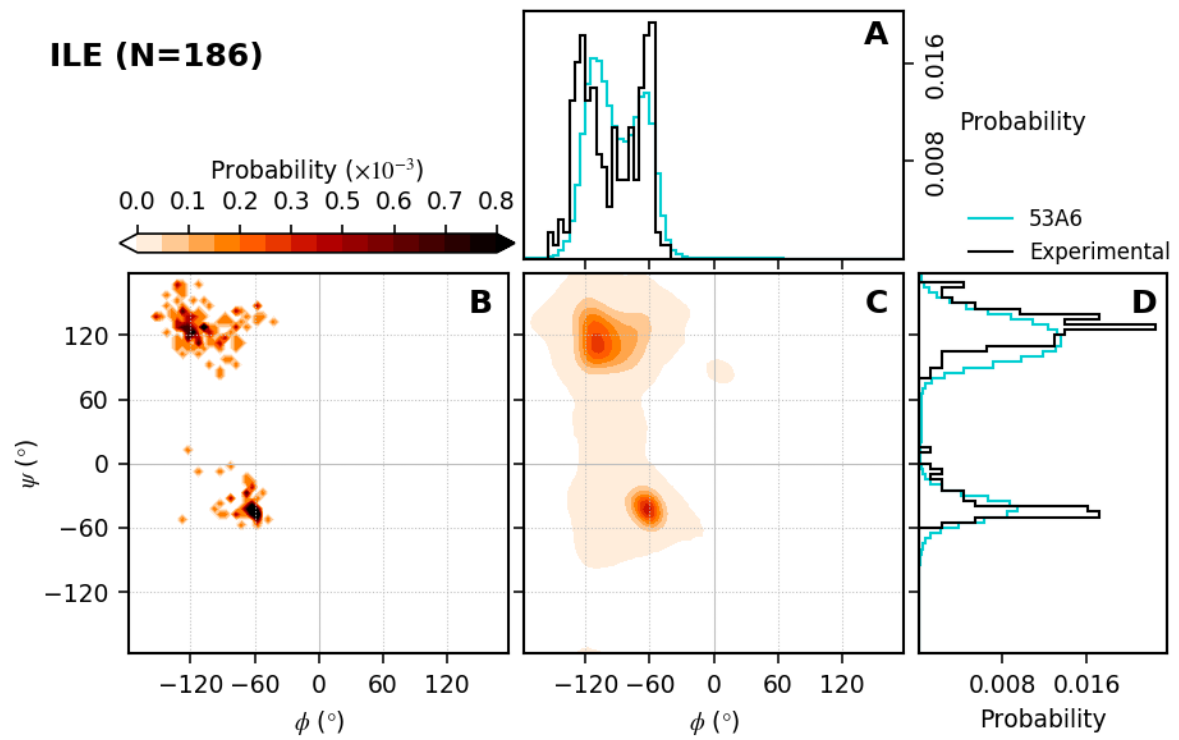

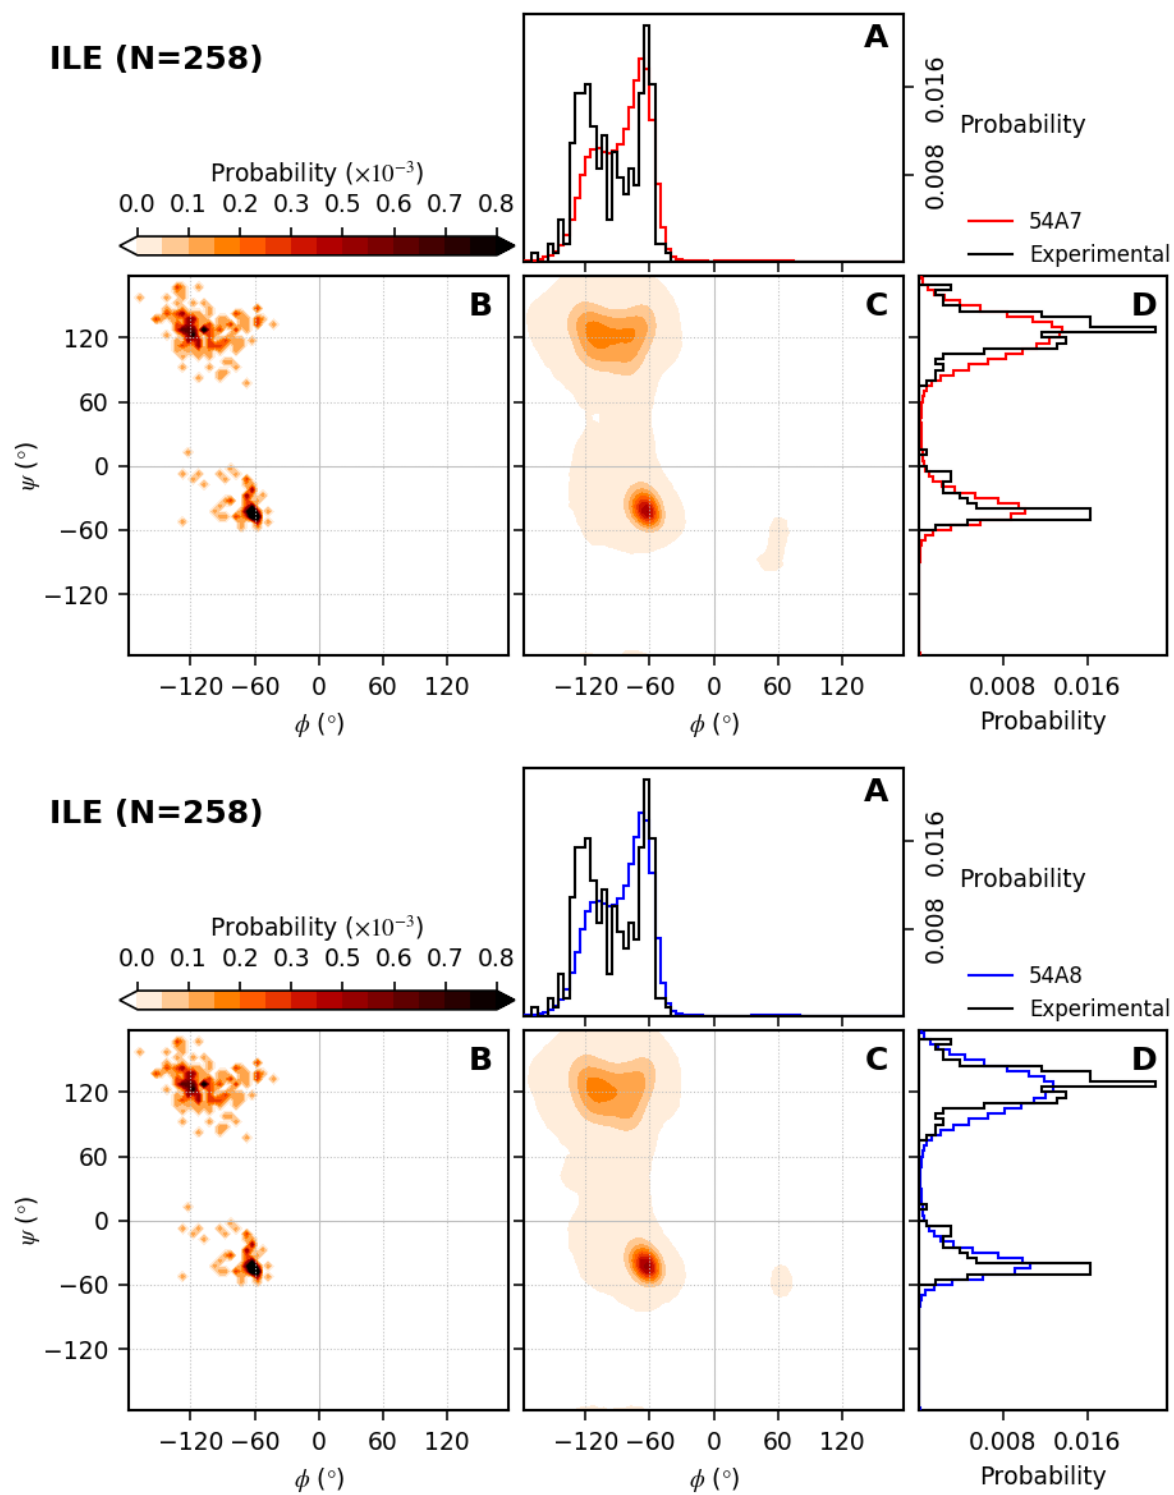

**Figure S15.** Distribution of isoleucine (ILE) backbone dihedral angles.

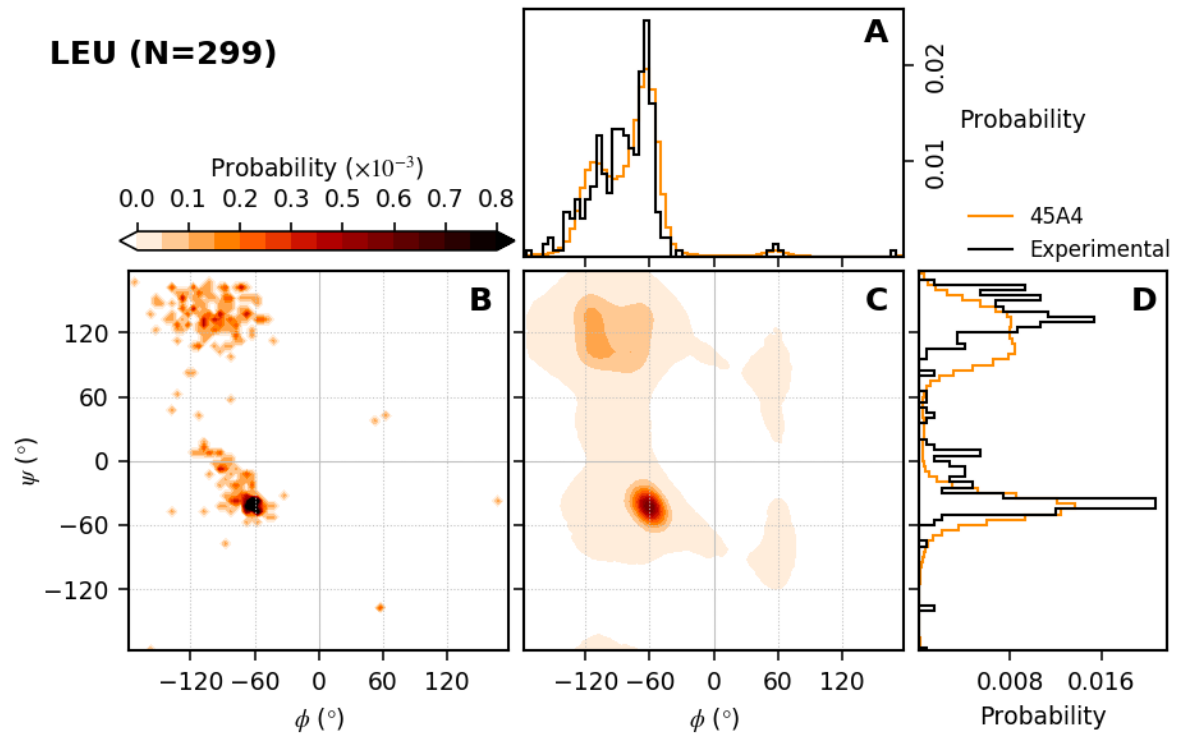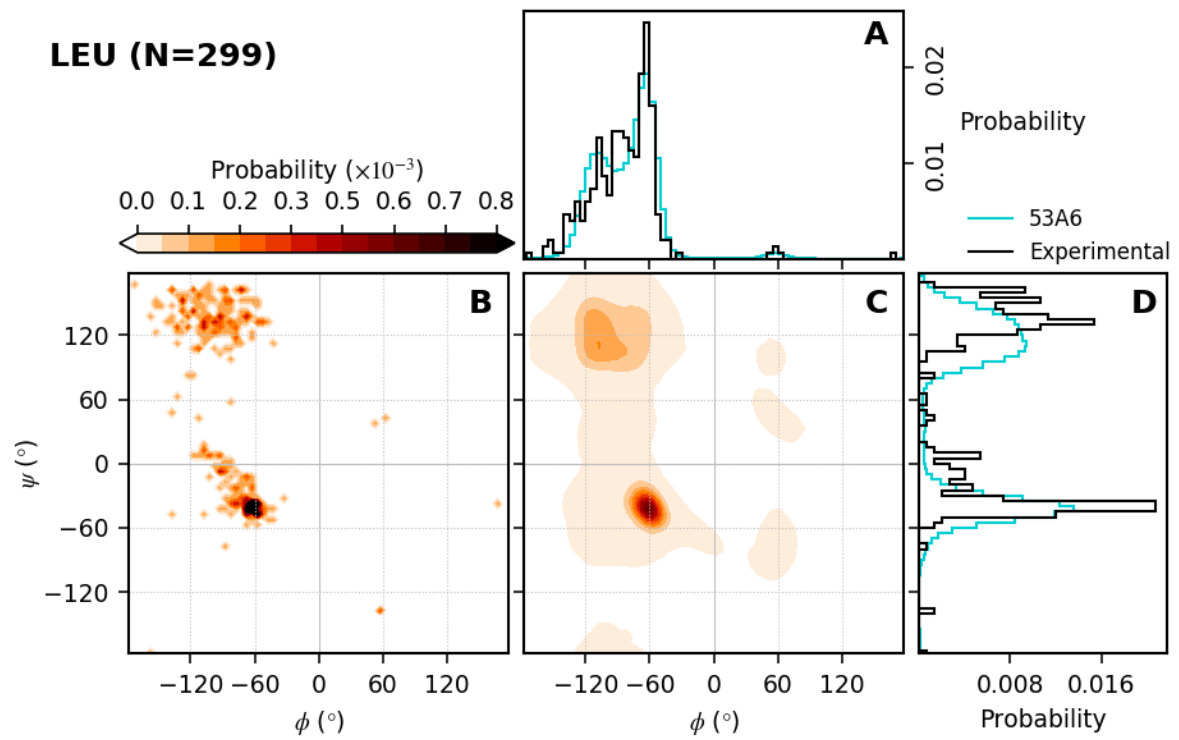

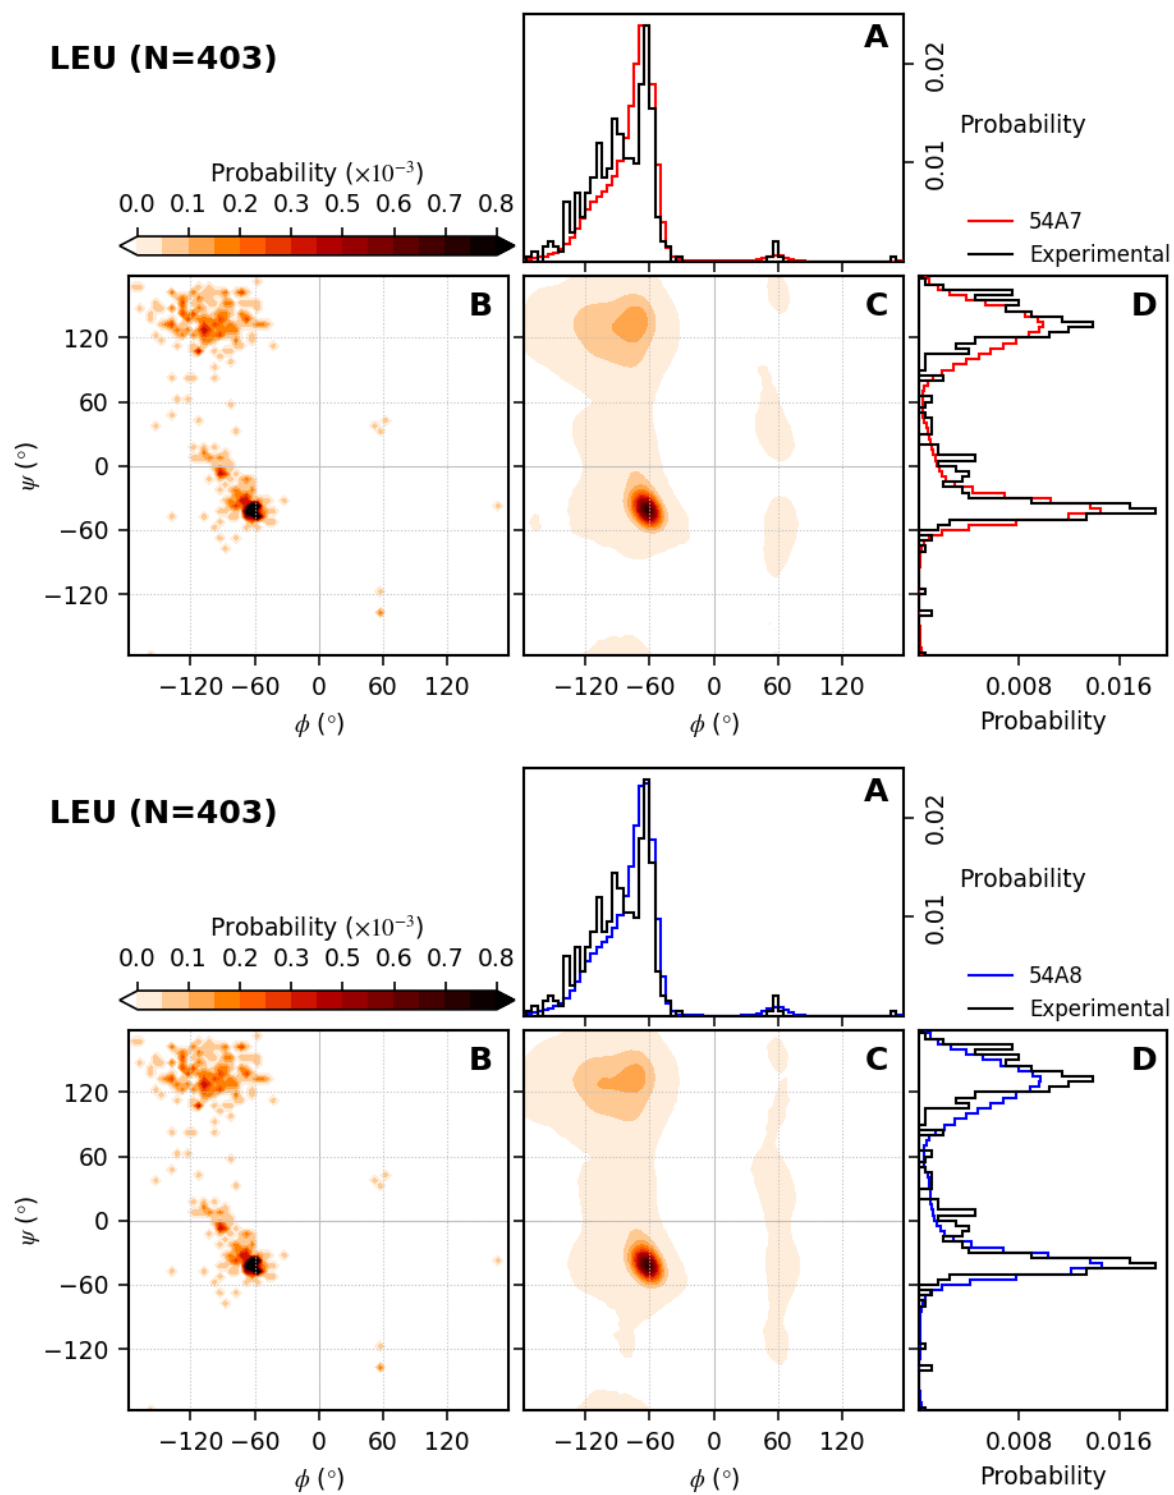

**Figure S16.** Distribution of leucine (LEU) backbone dihedral angles.

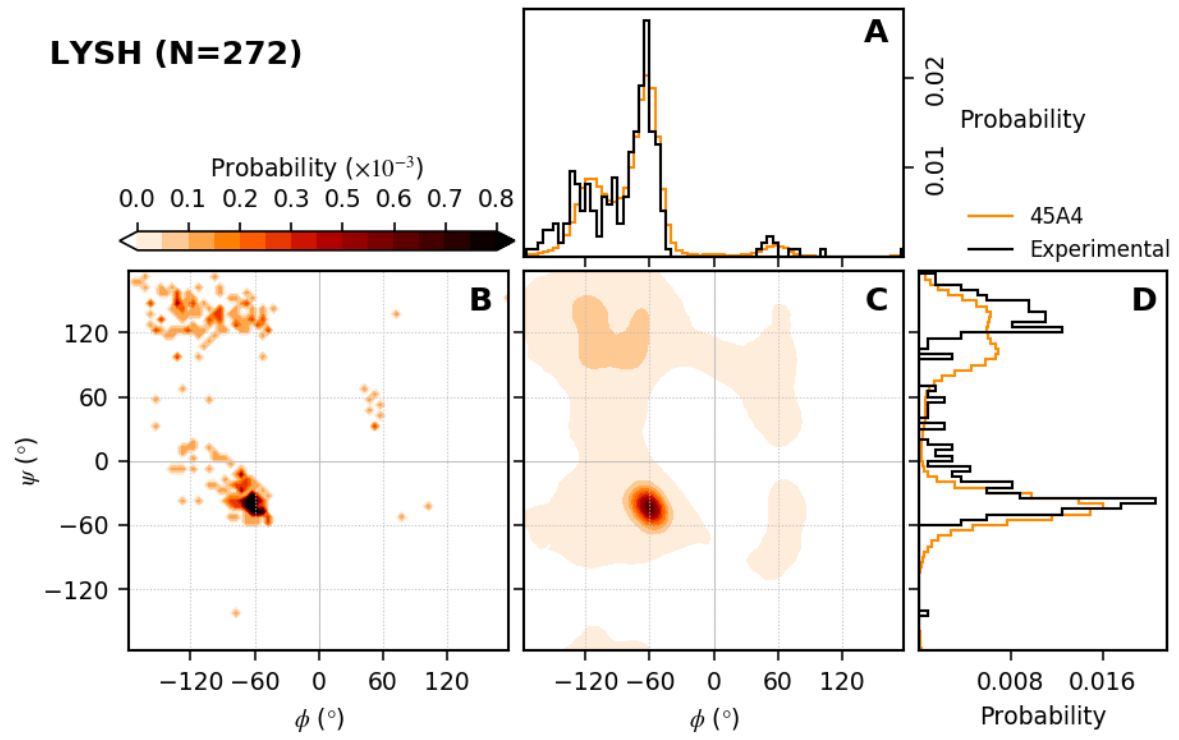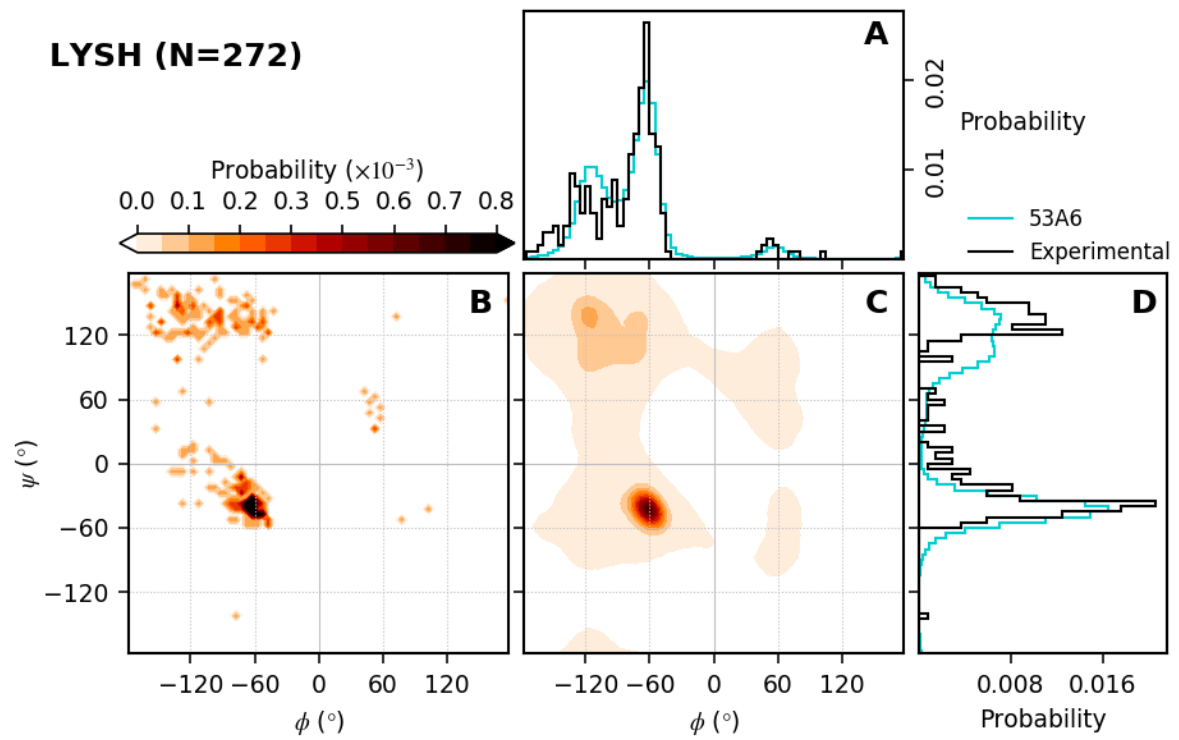



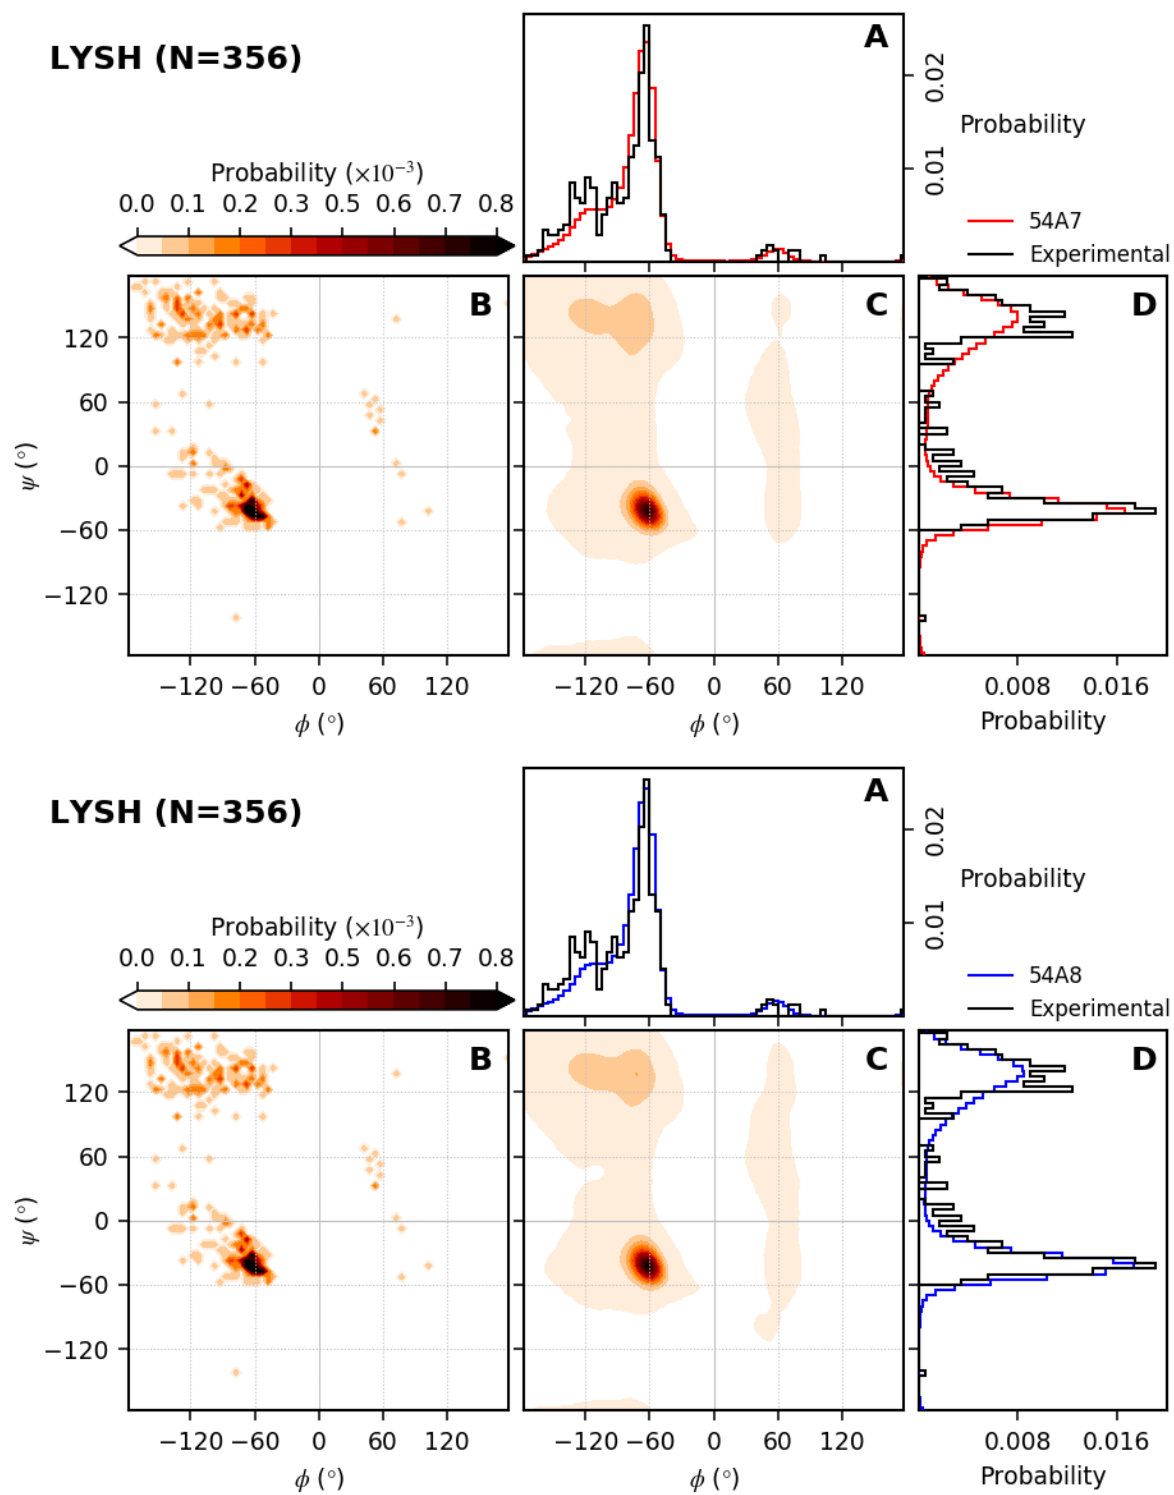

**Figure S17.** Distribution of lysine with +1 formal charge (LYSH) backbone dihedral angles.

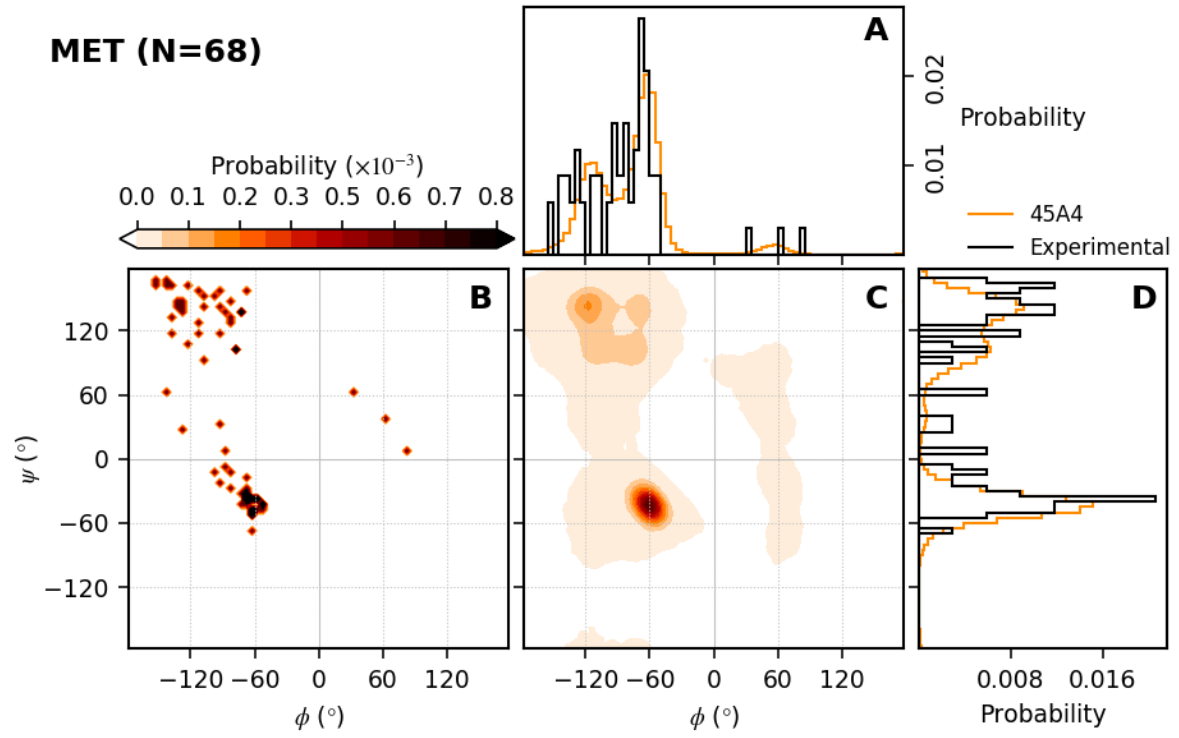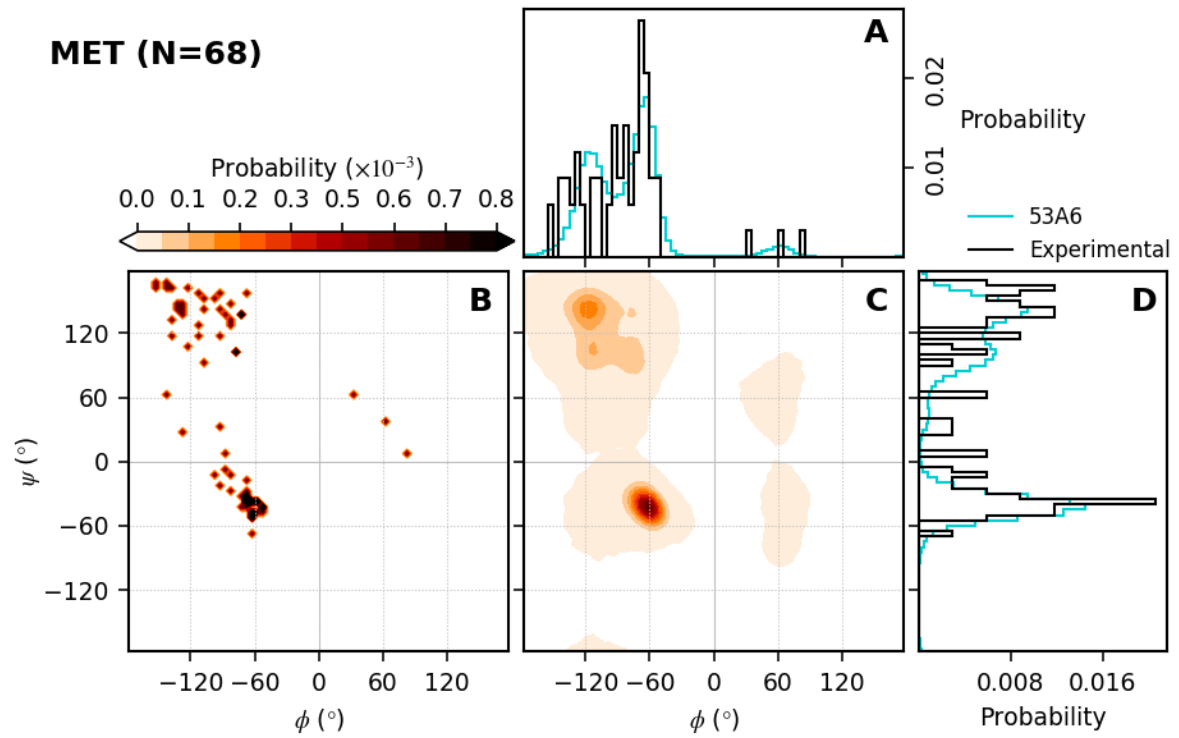

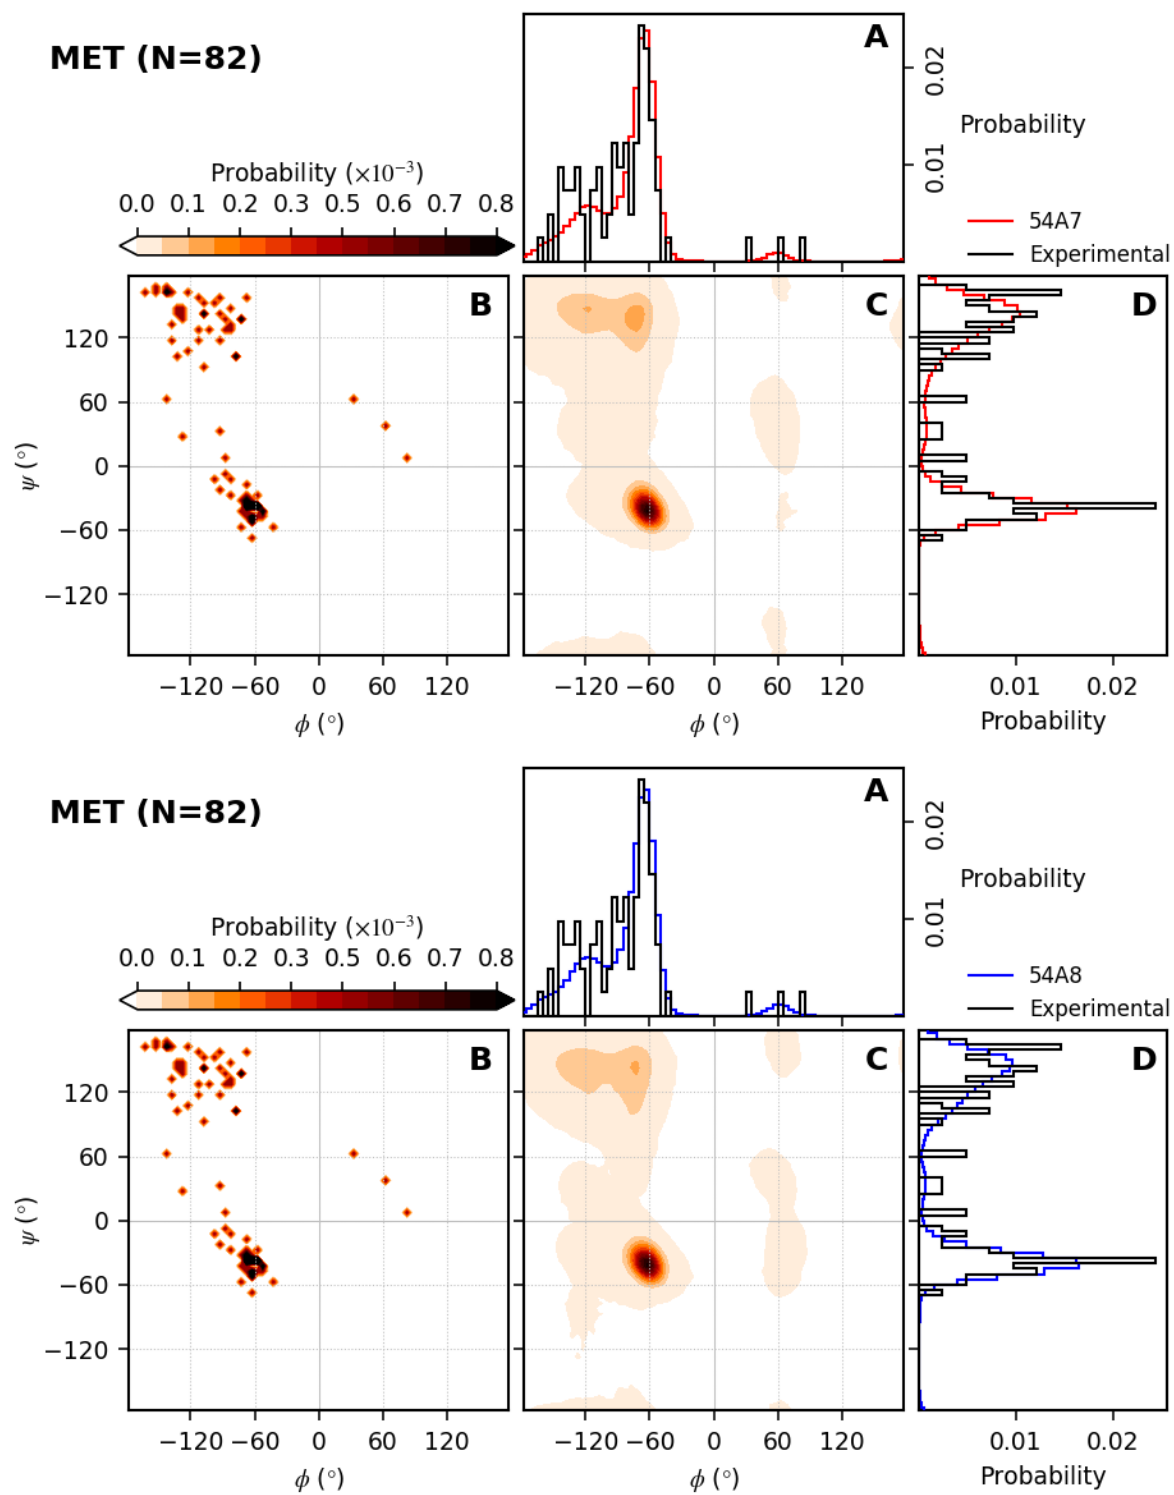

**Figure S18.** Distribution of methionine (MET) backbone dihedral angles.

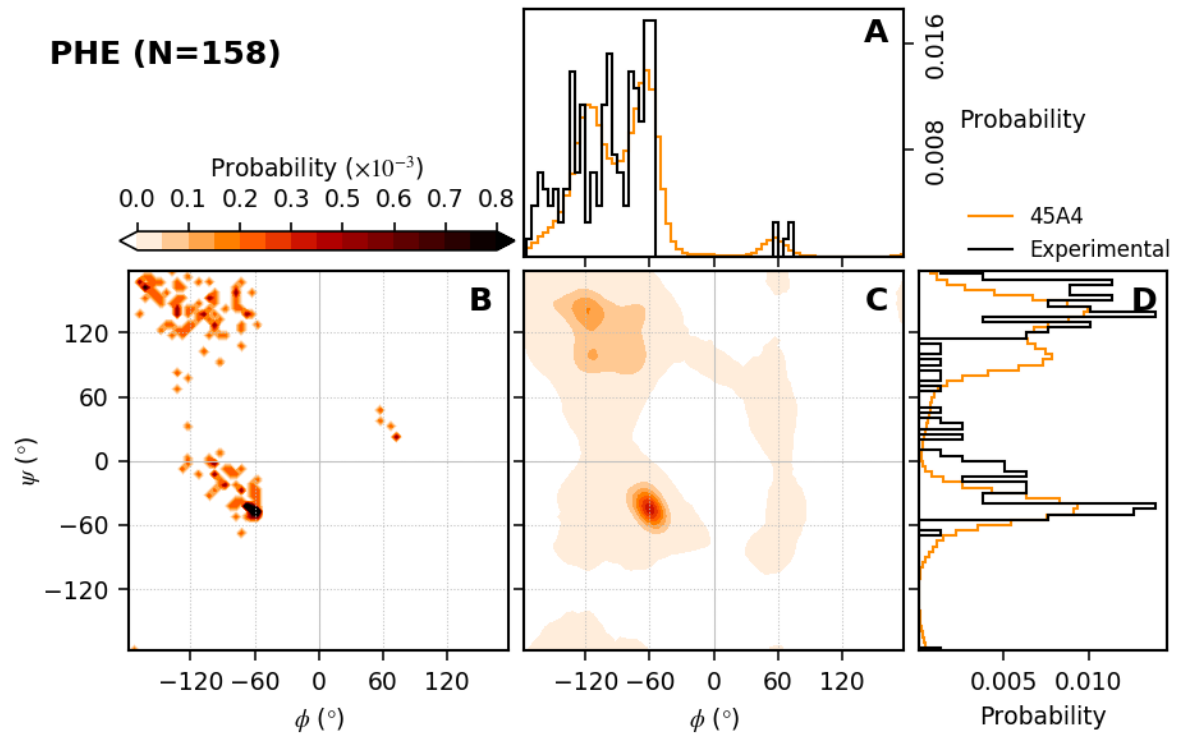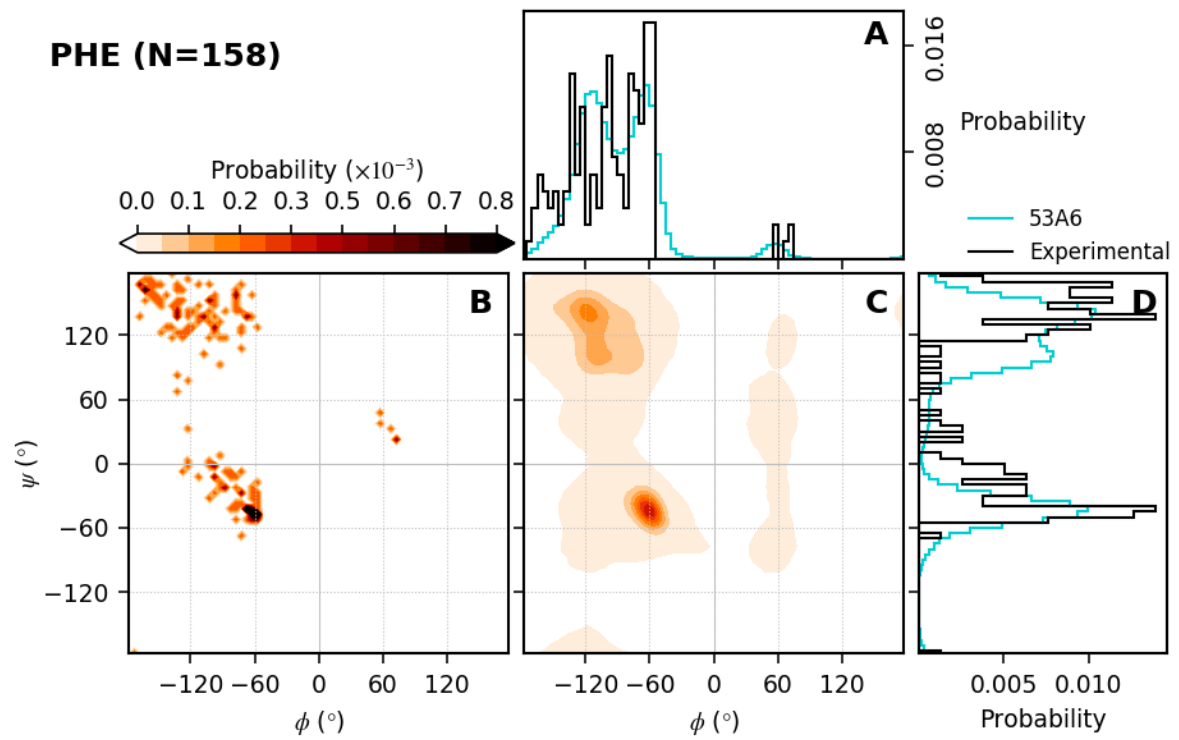

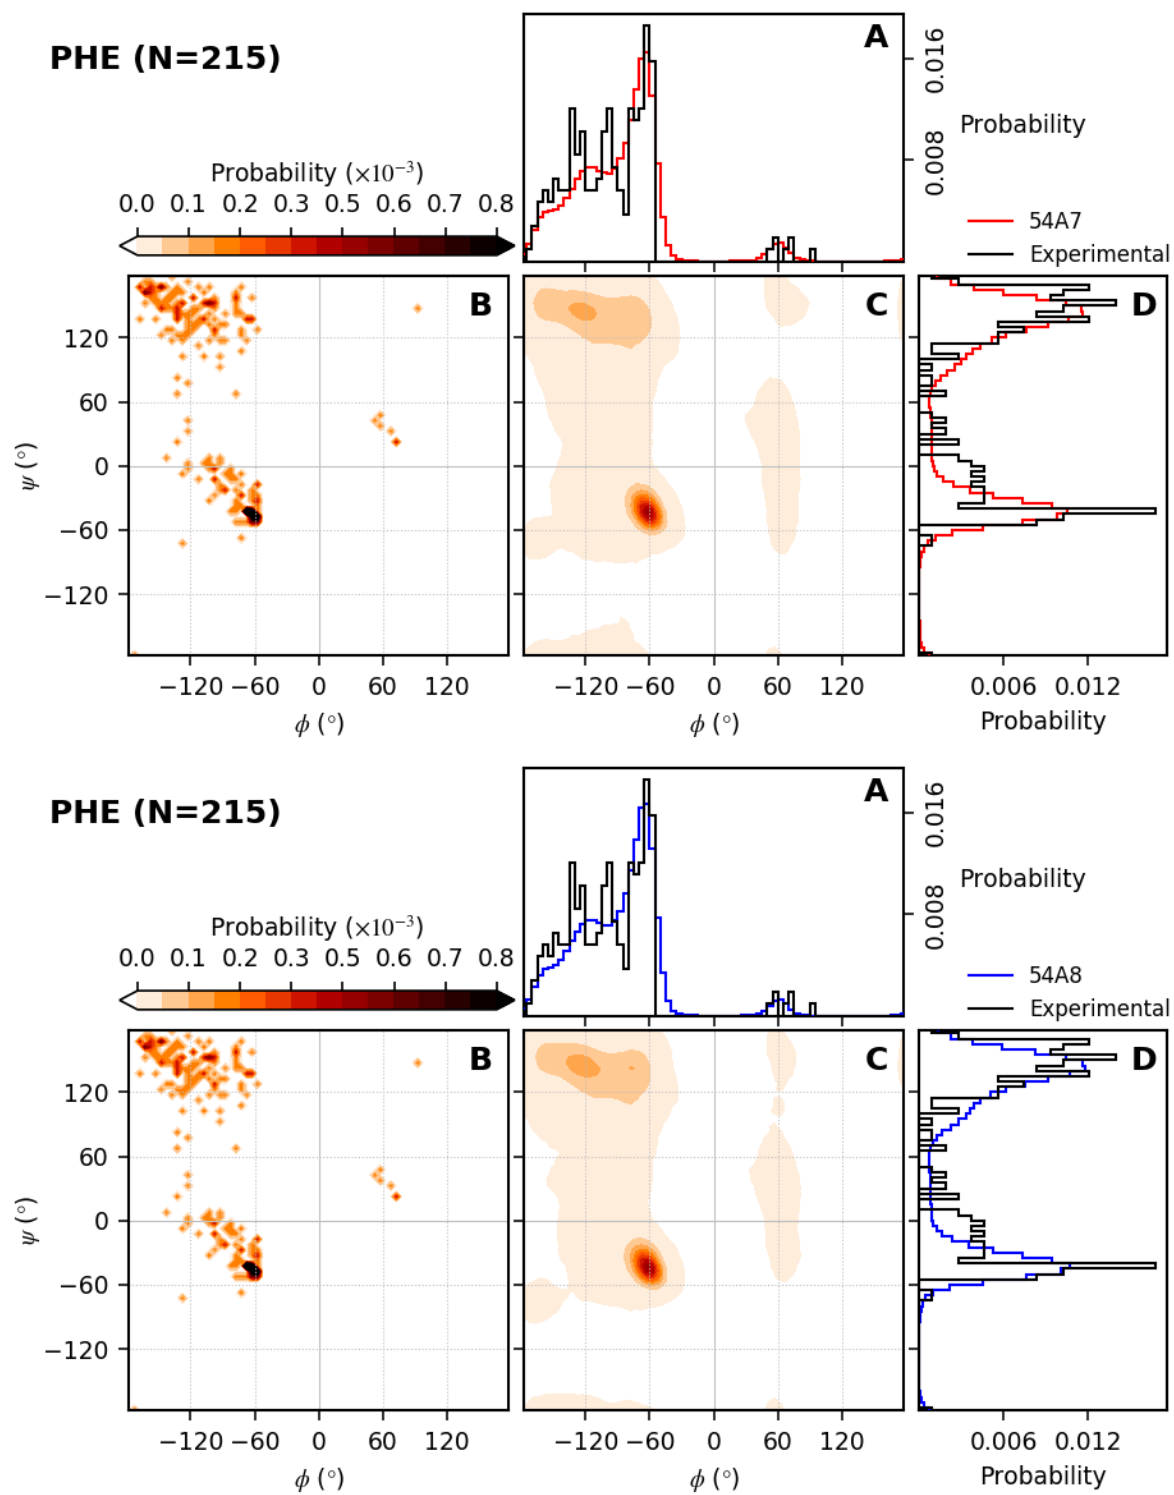

**Figure S19.** Distribution of phenylalanine (PHE) backbone dihedral angles.

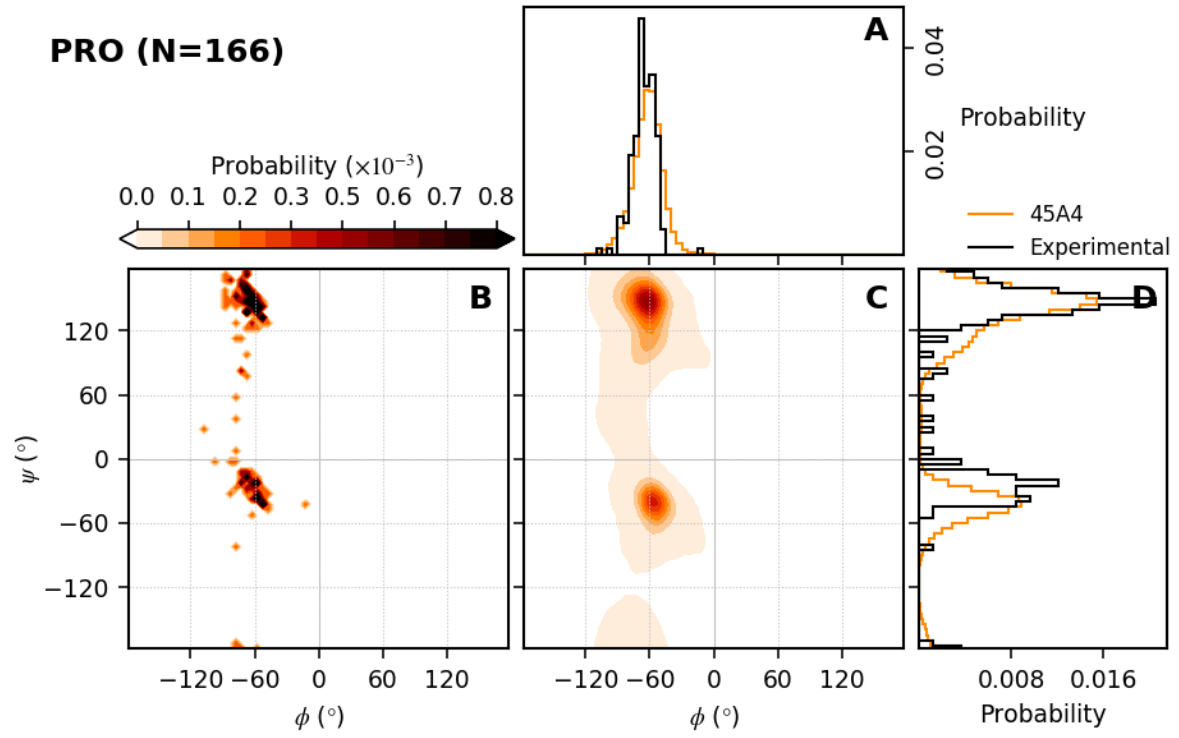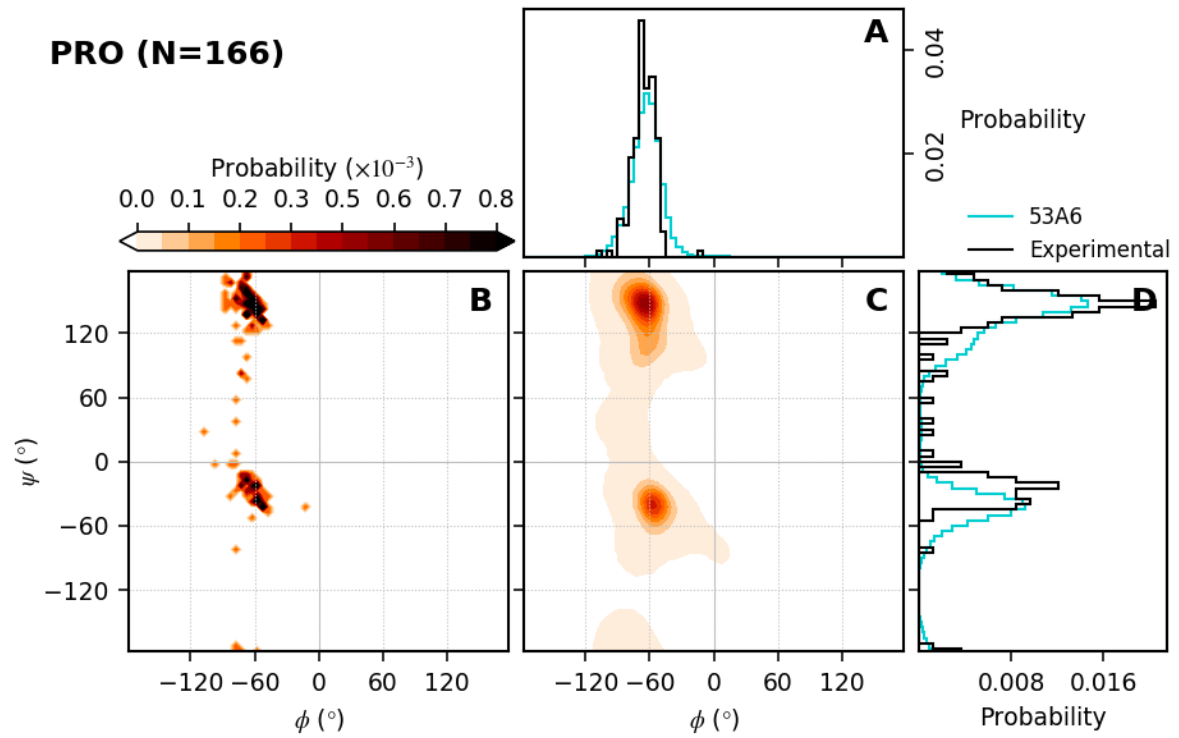

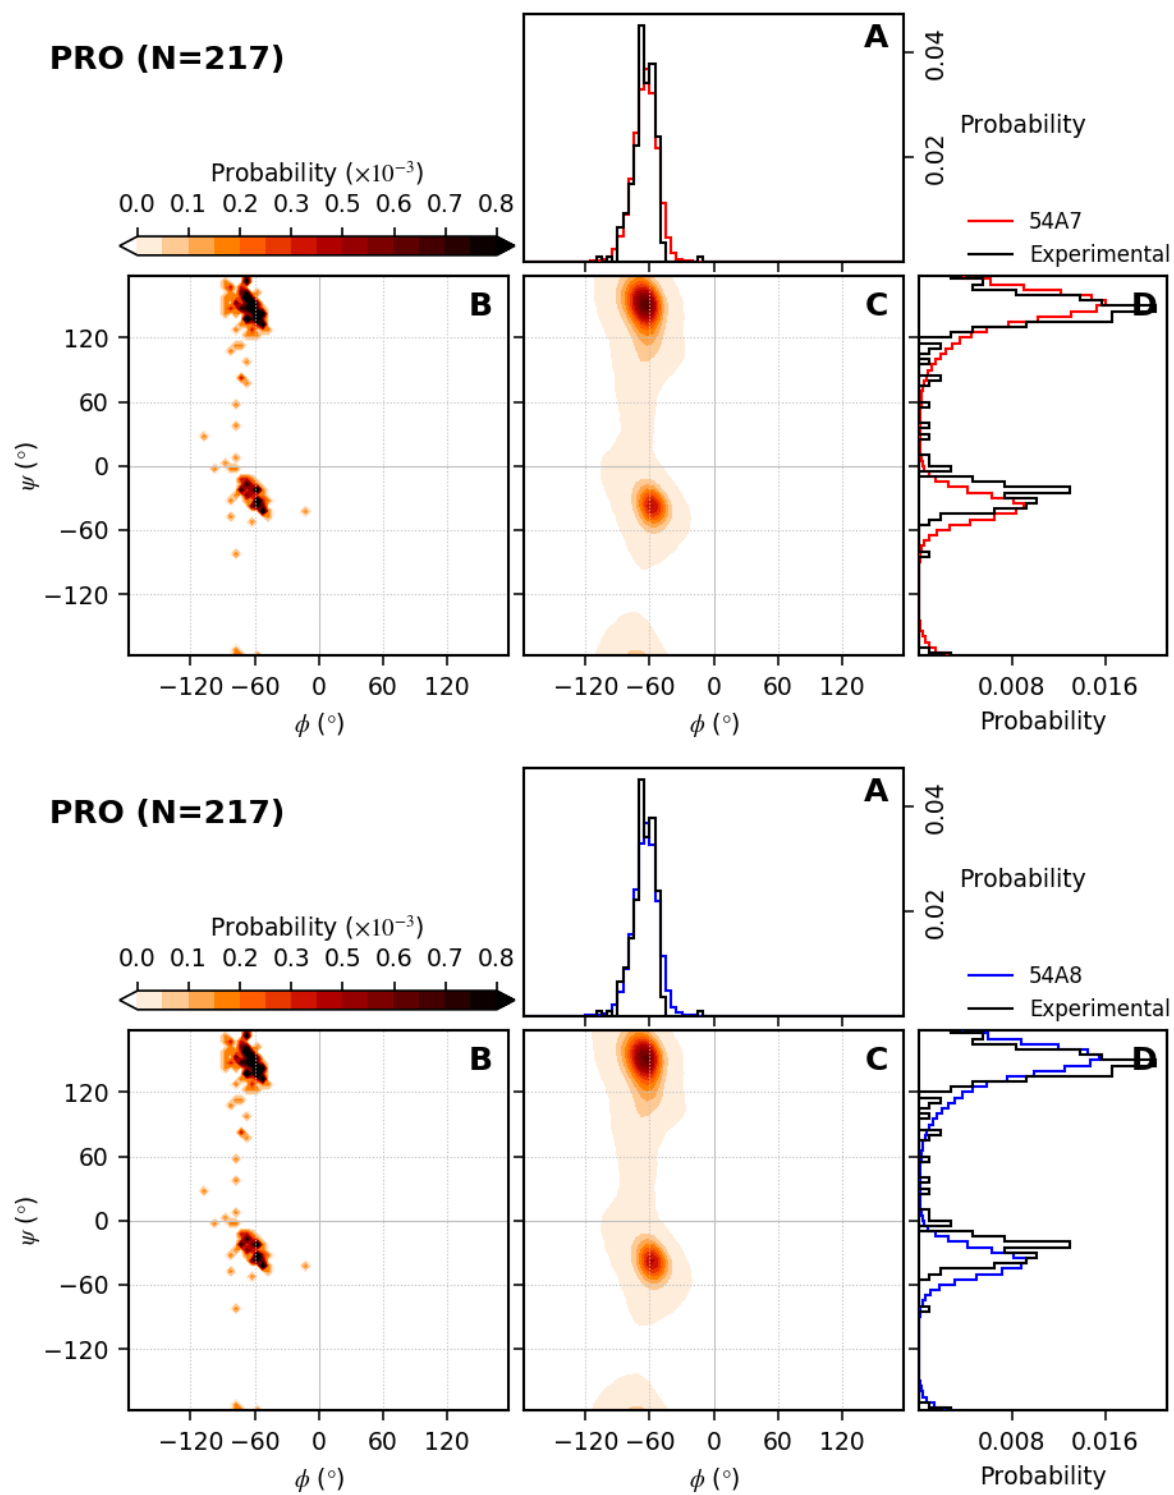

**Figure S20.** Distribution of proline (PRO) backbone dihedral angles.

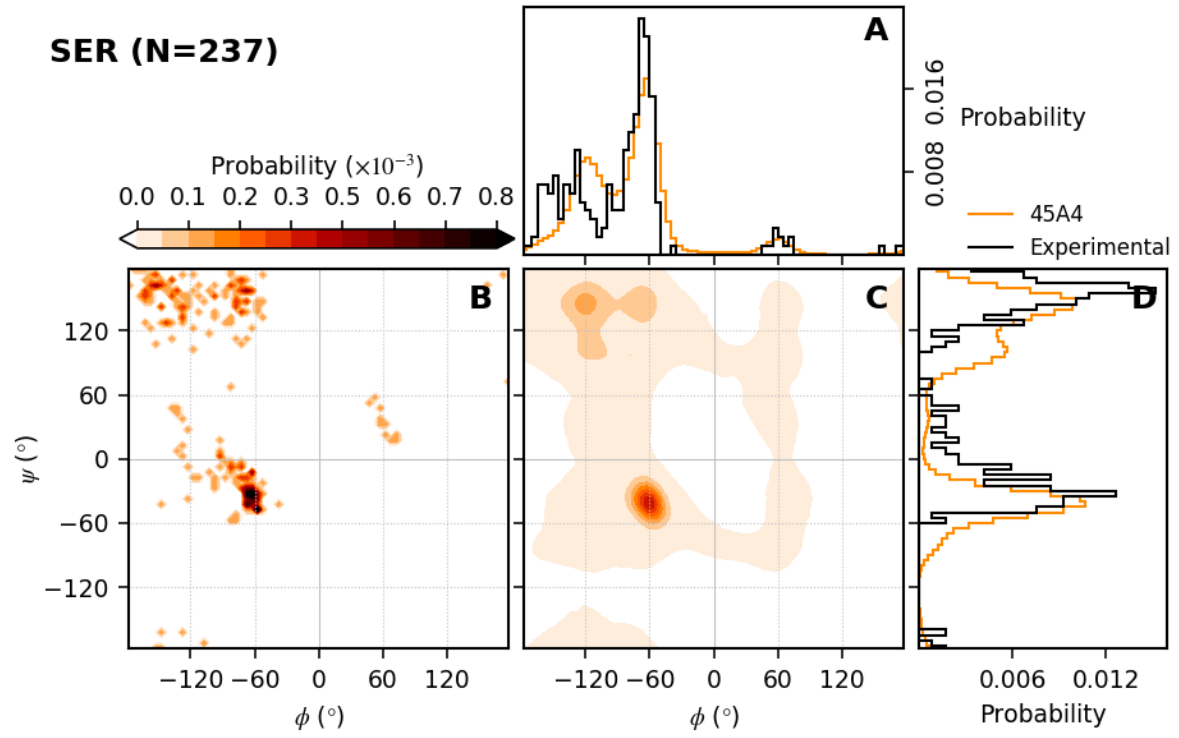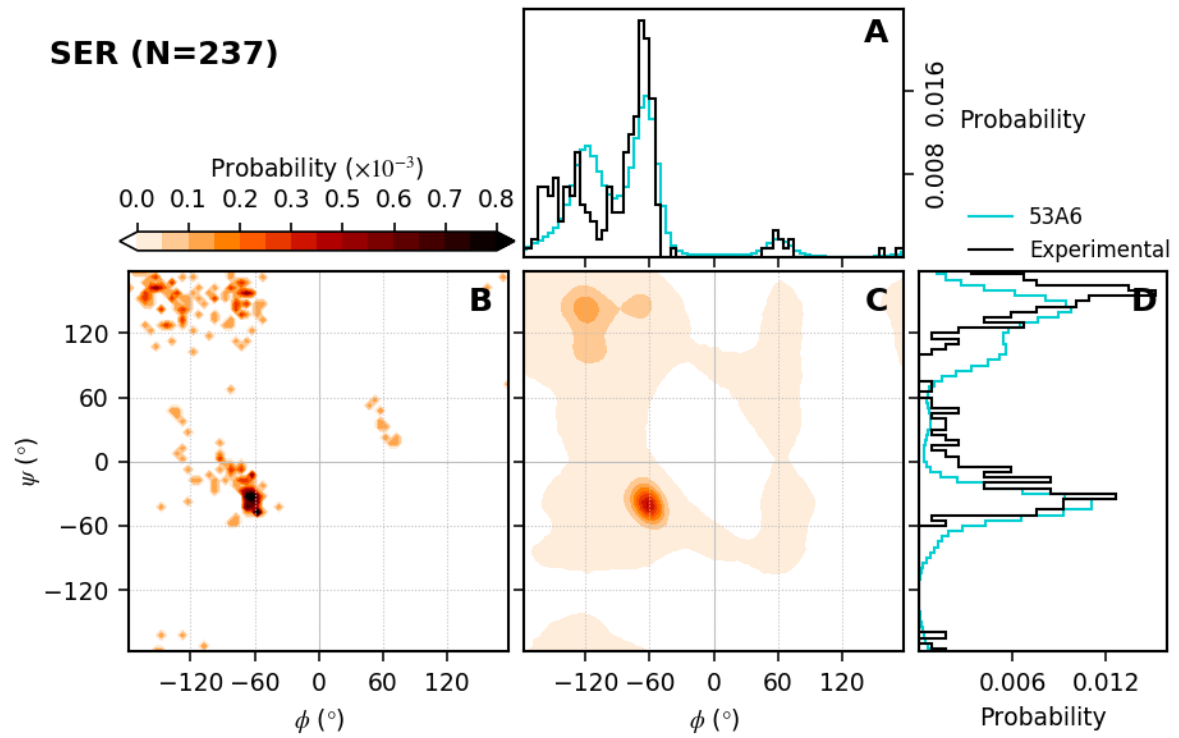



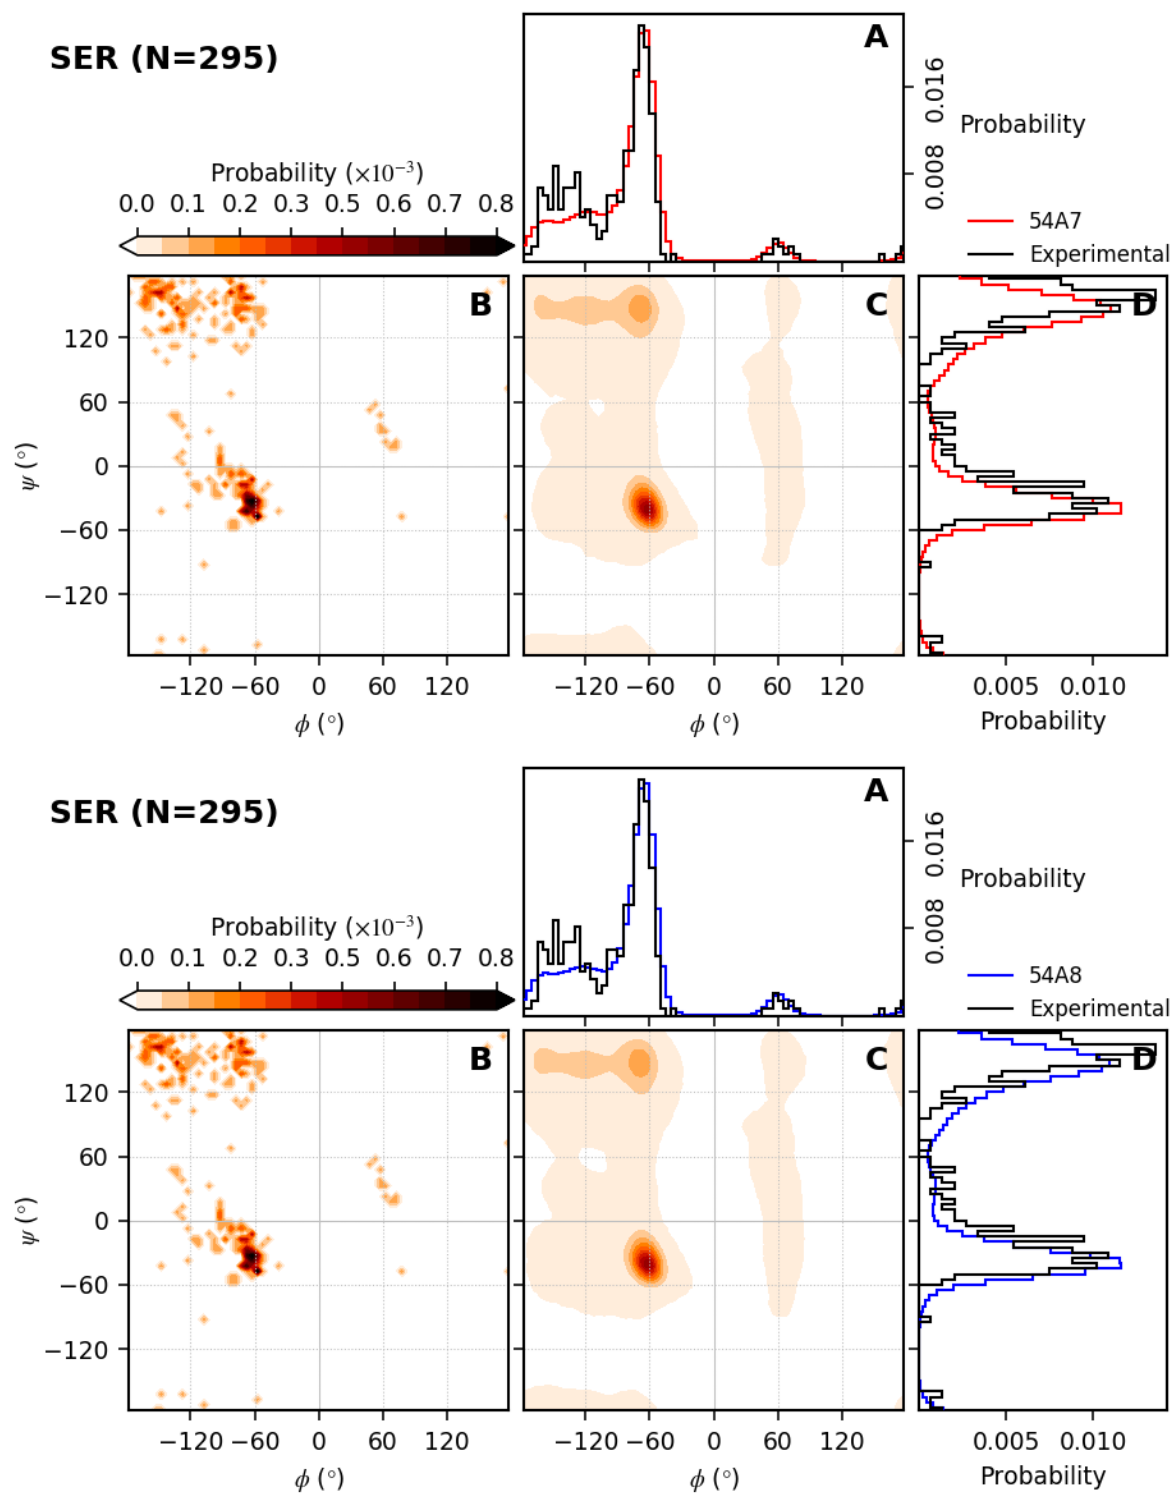

**Figure S21.** Distribution of serine (SER) backbone dihedral angles.

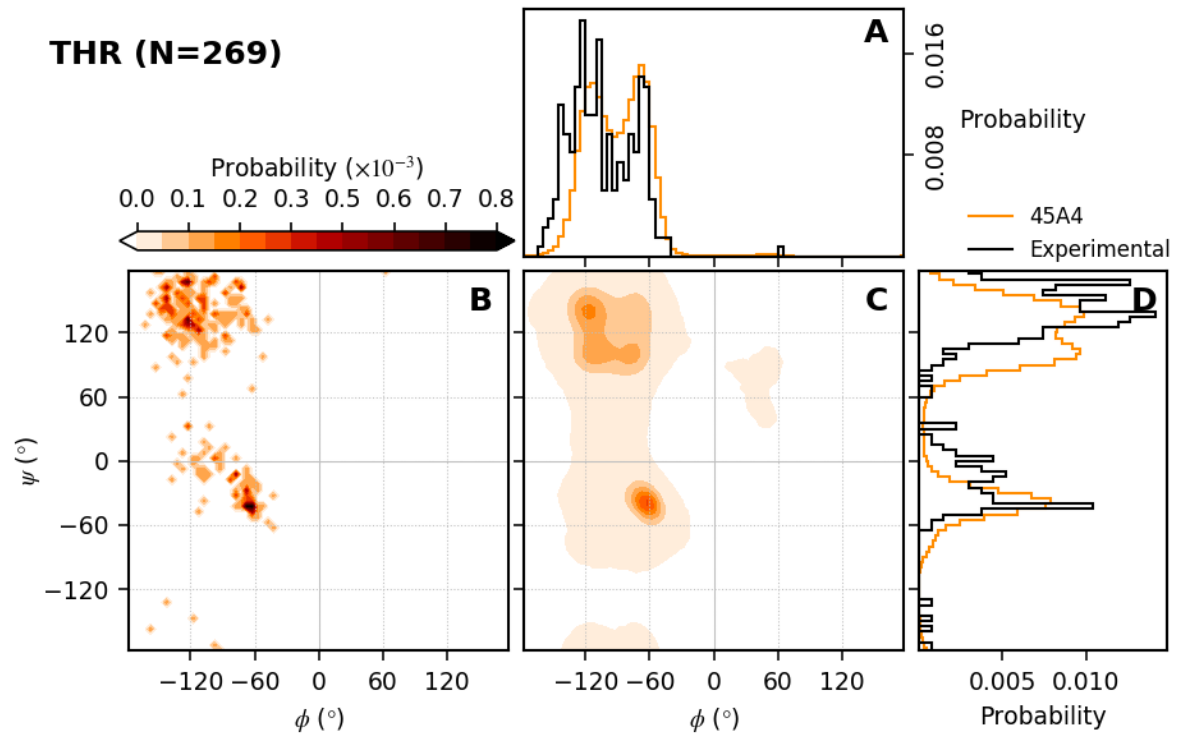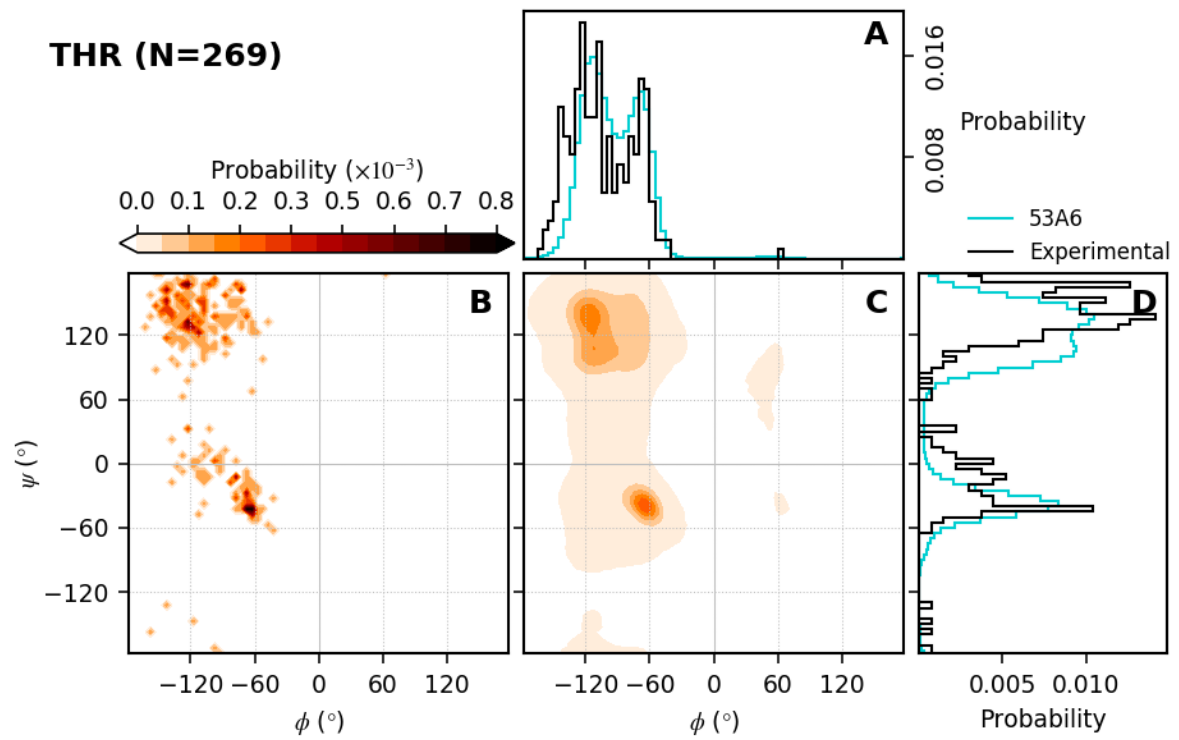

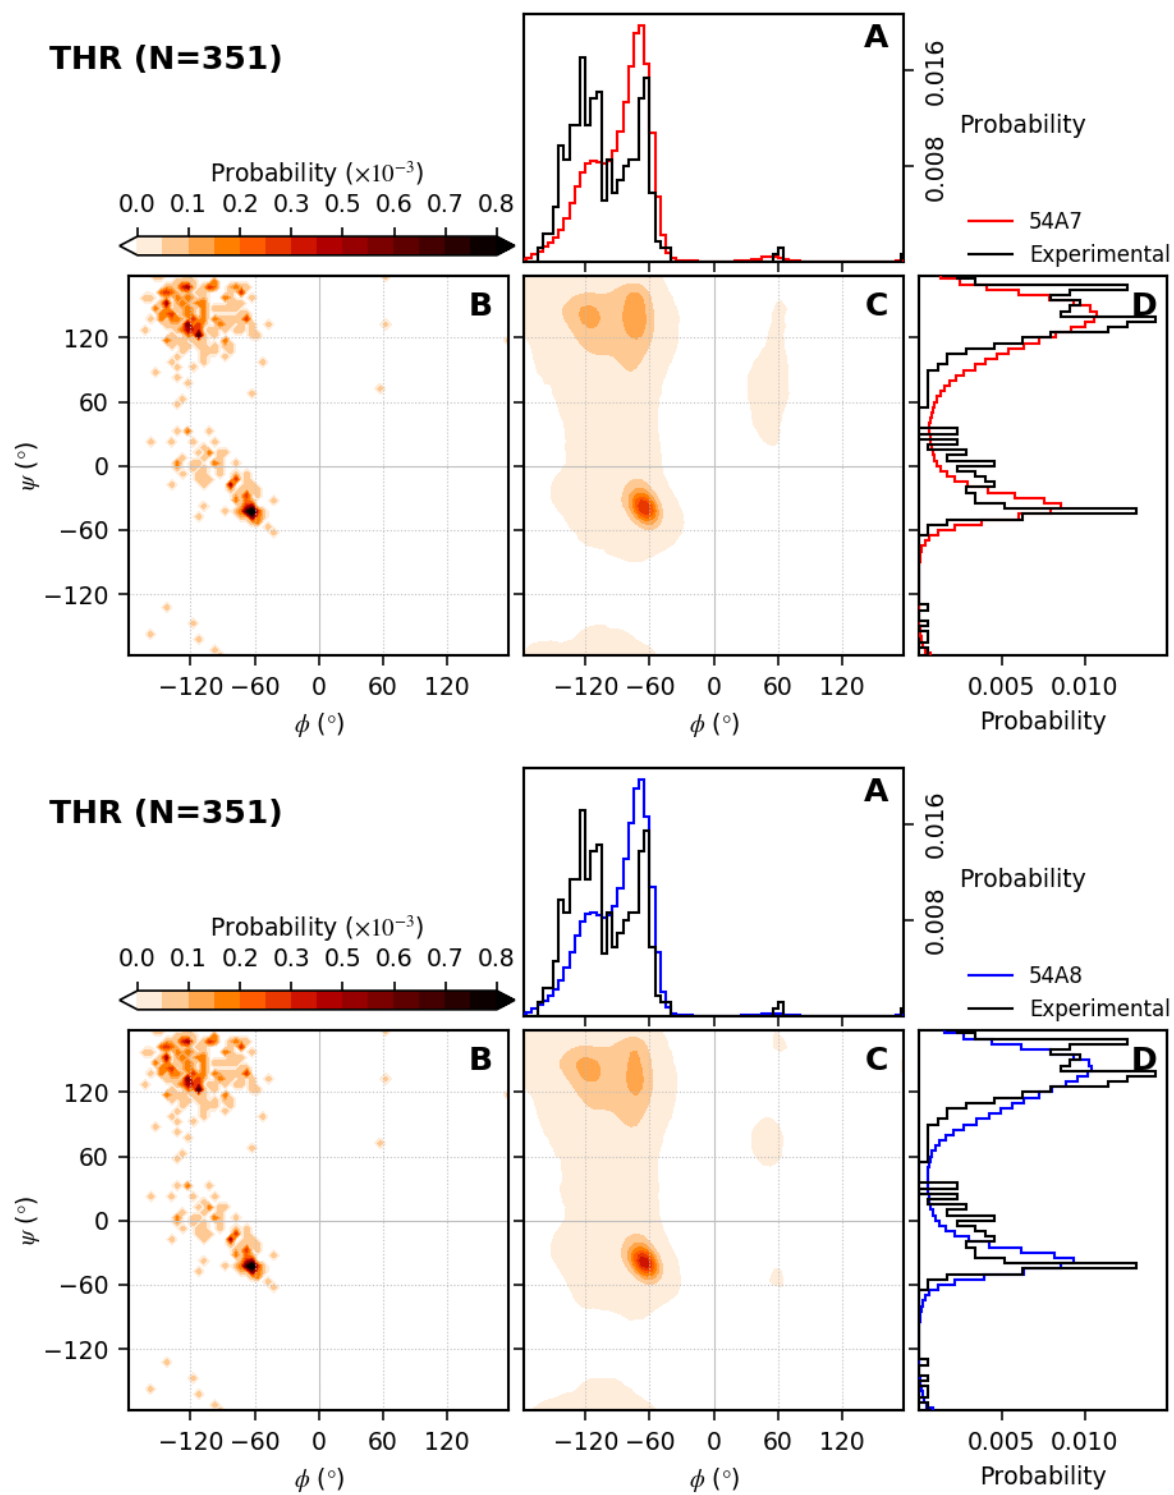

**Figure S22.** Distribution of threonine (THR) backbone dihedral angles.

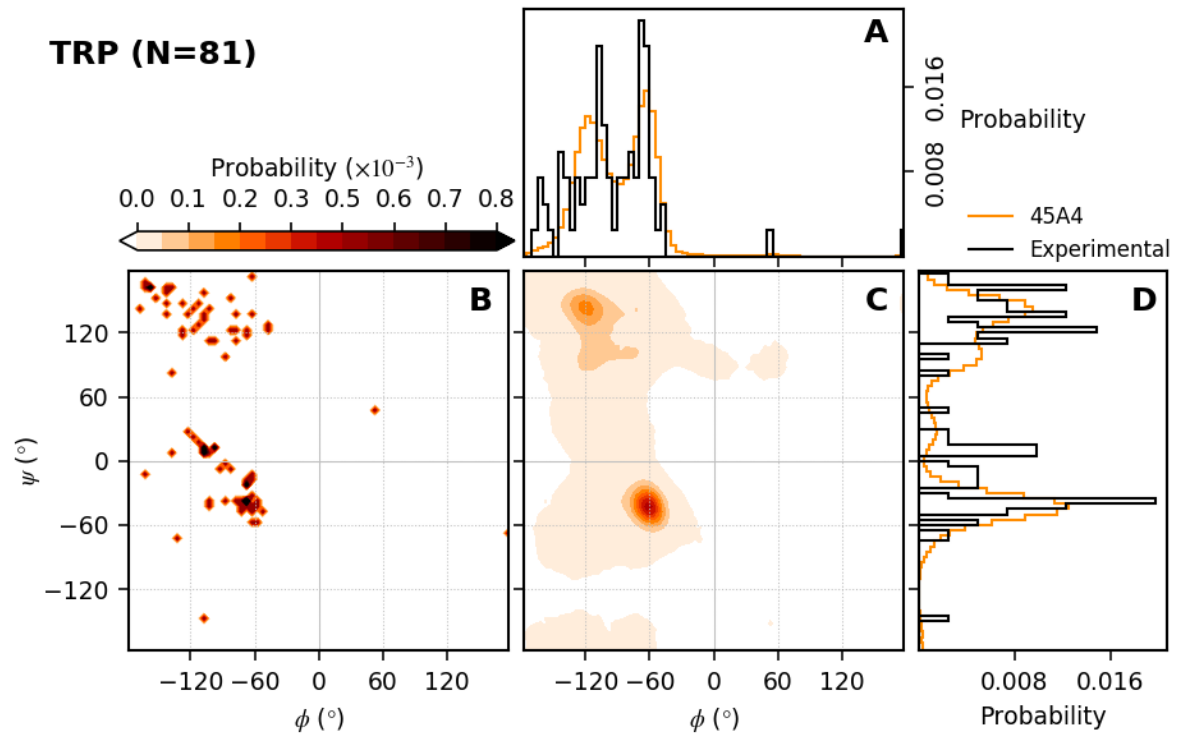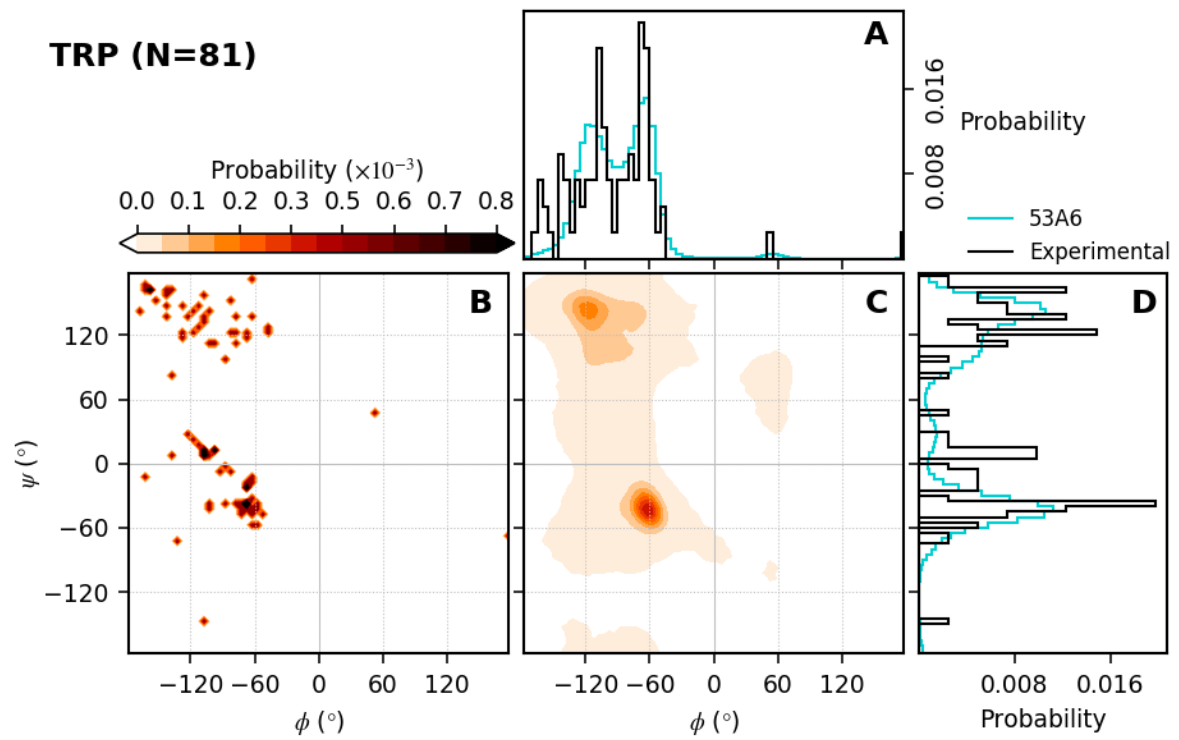

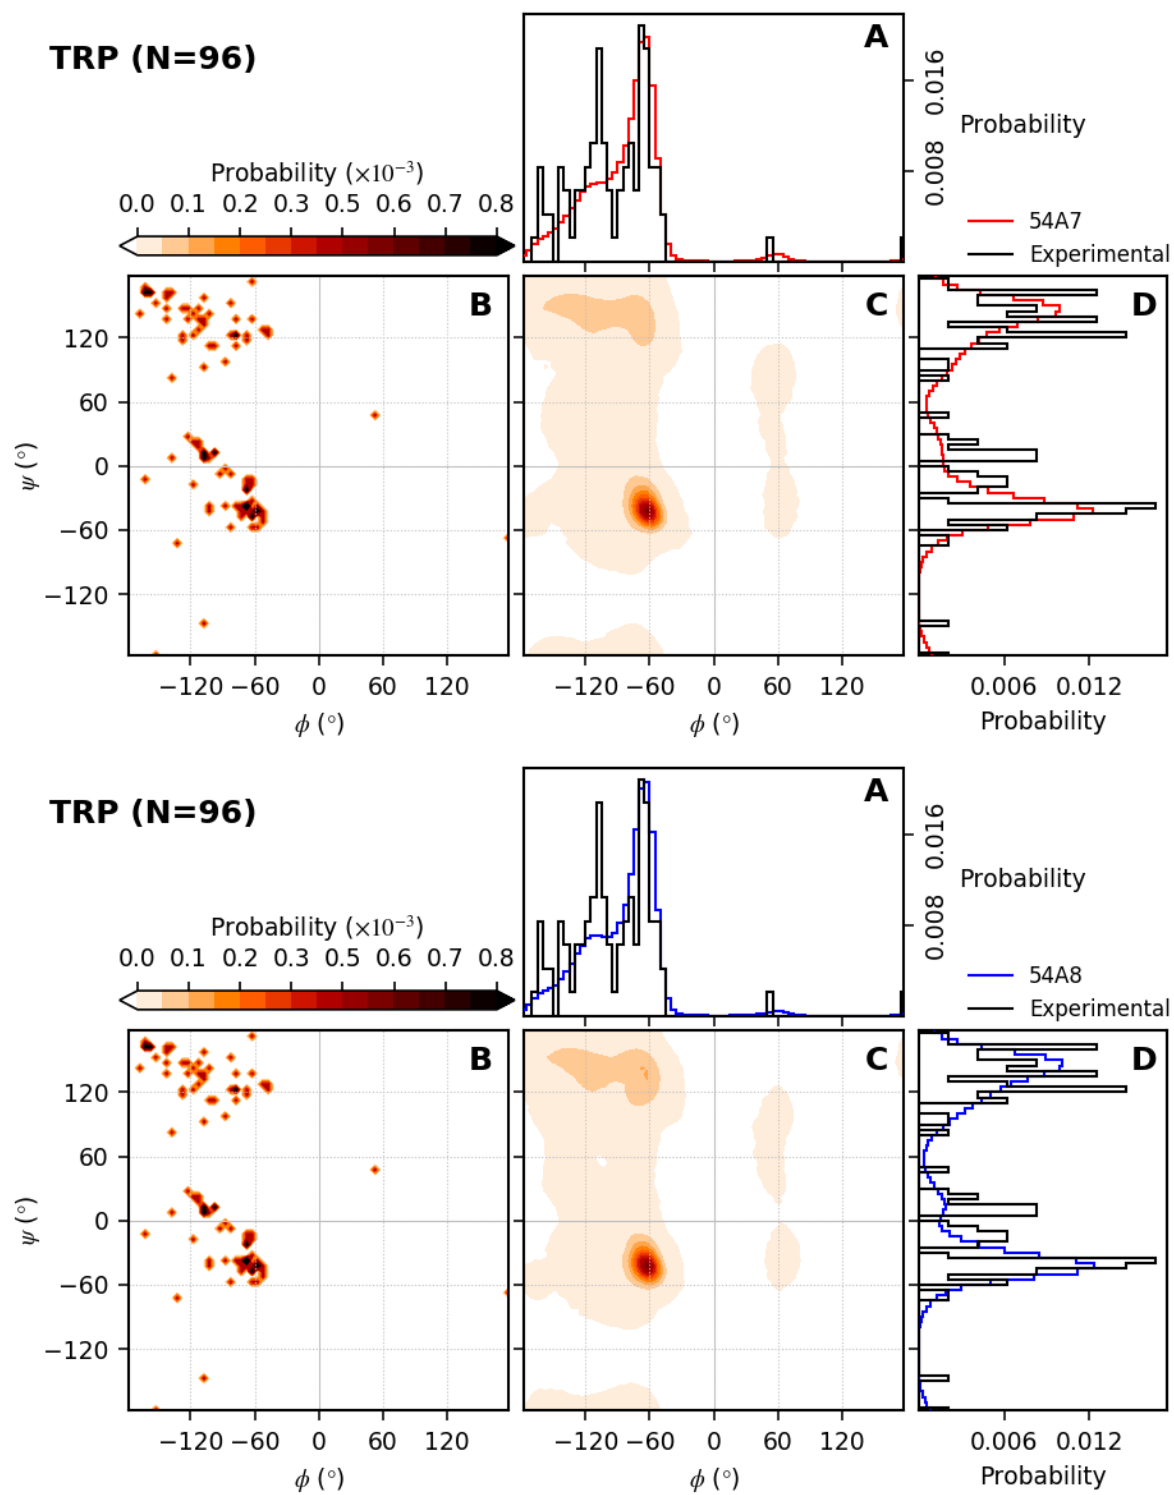

**Figure S23.** Distribution of tryptophan (TRP) backbone dihedral angles.

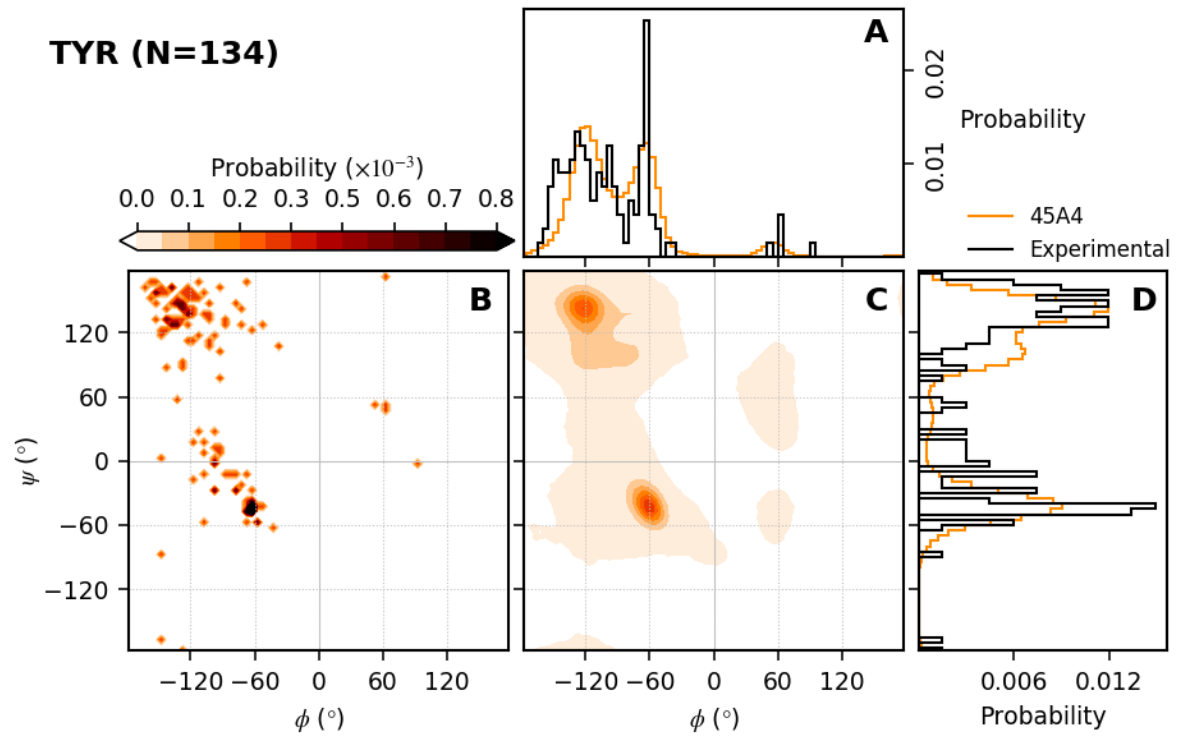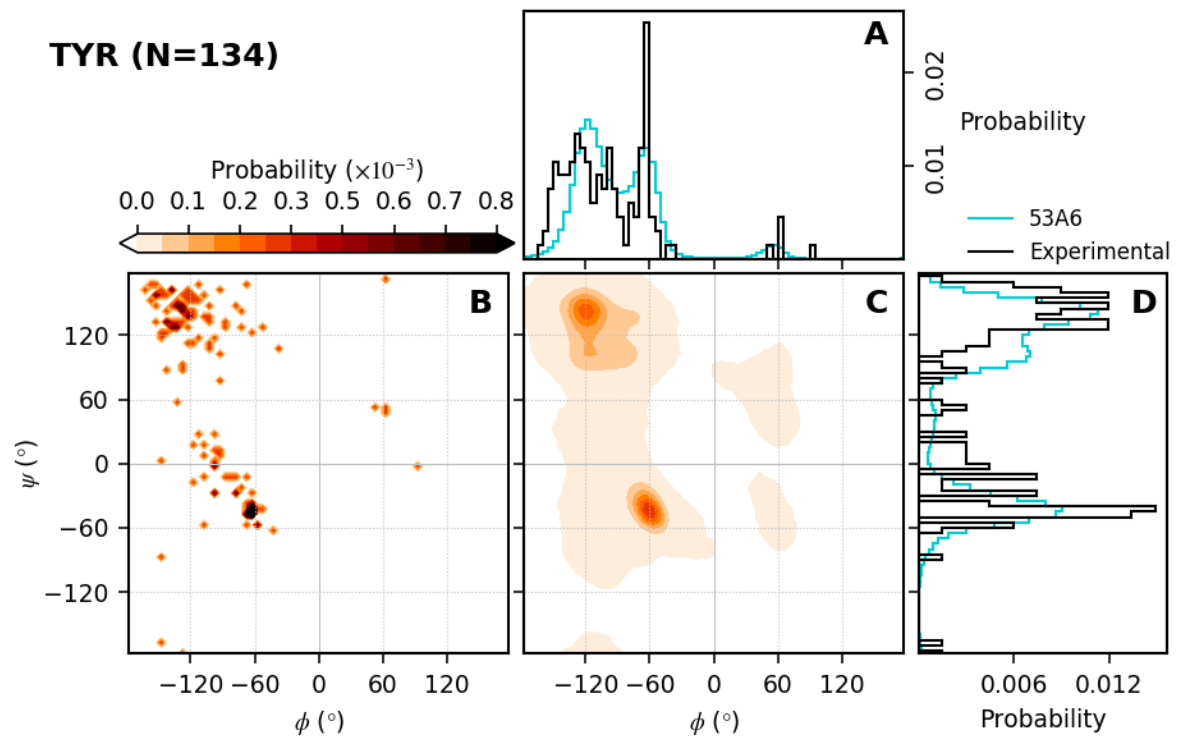

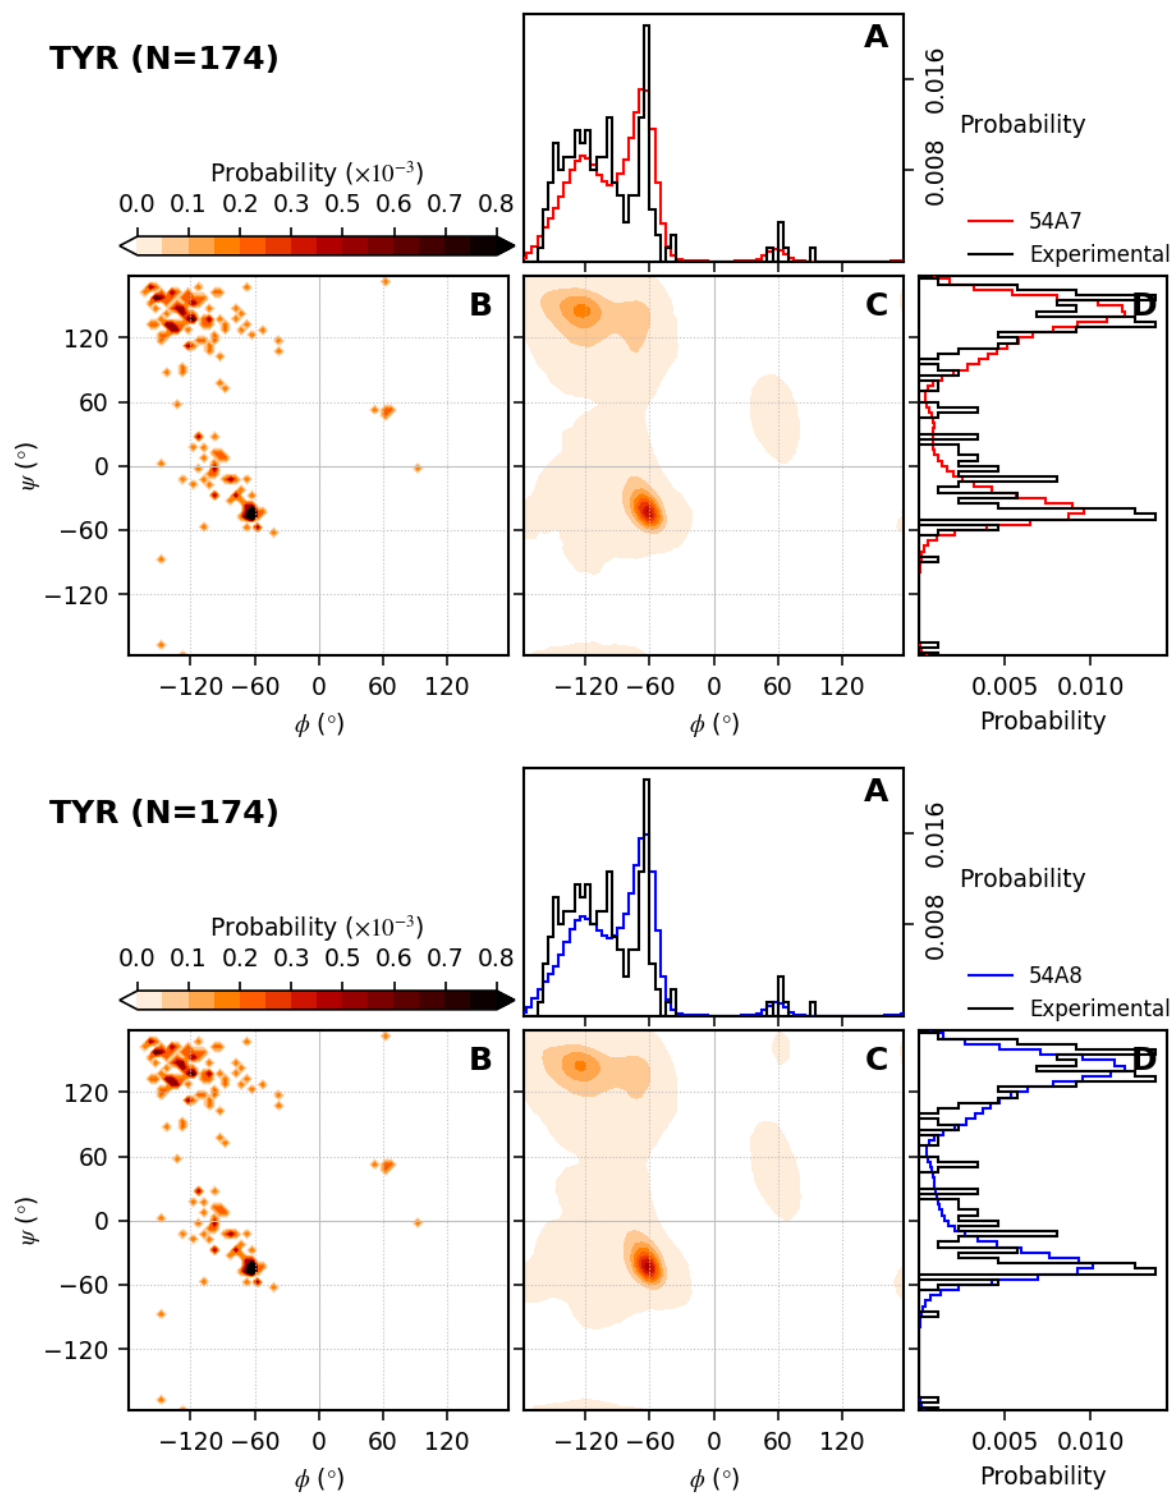

**Figure S24.** Distribution of tyrosine (TYR) backbone dihedral angles.

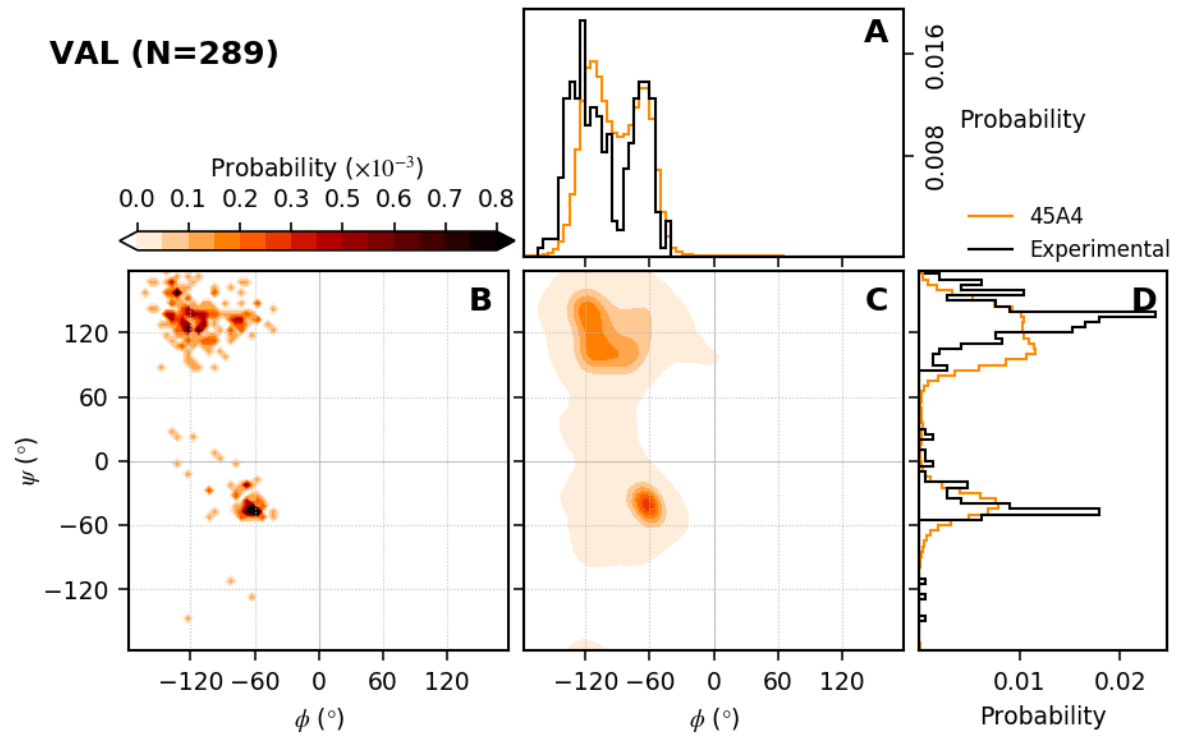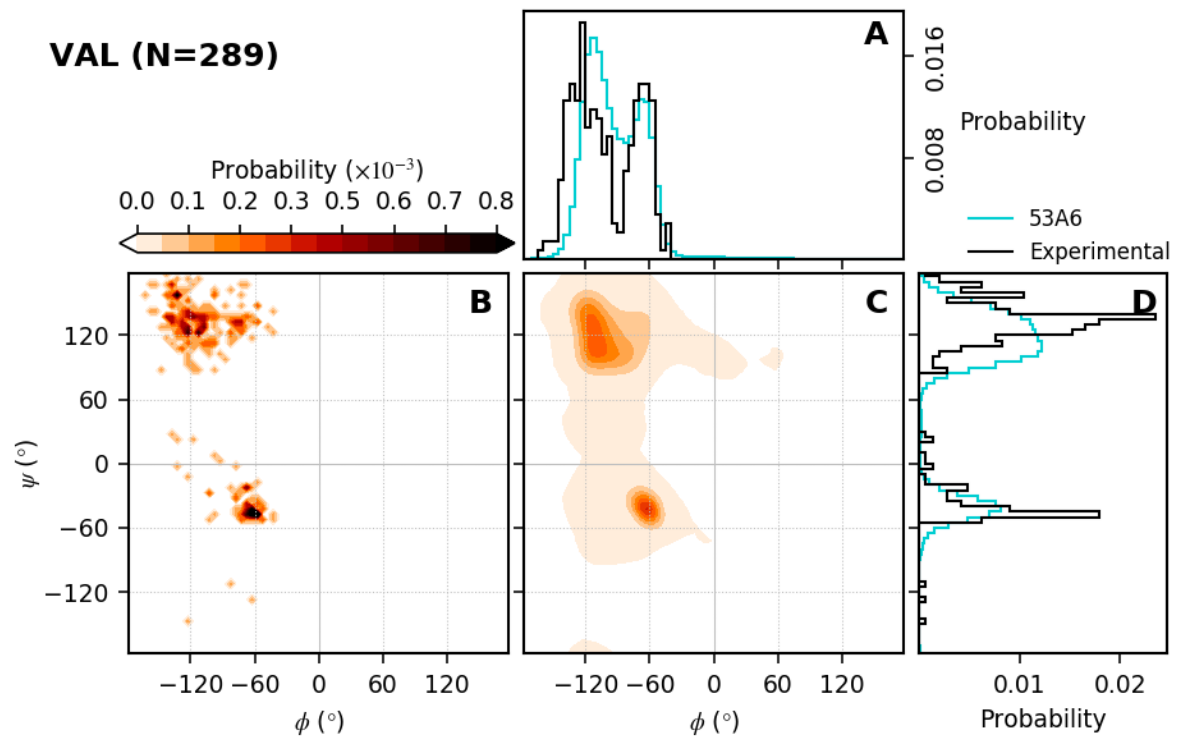



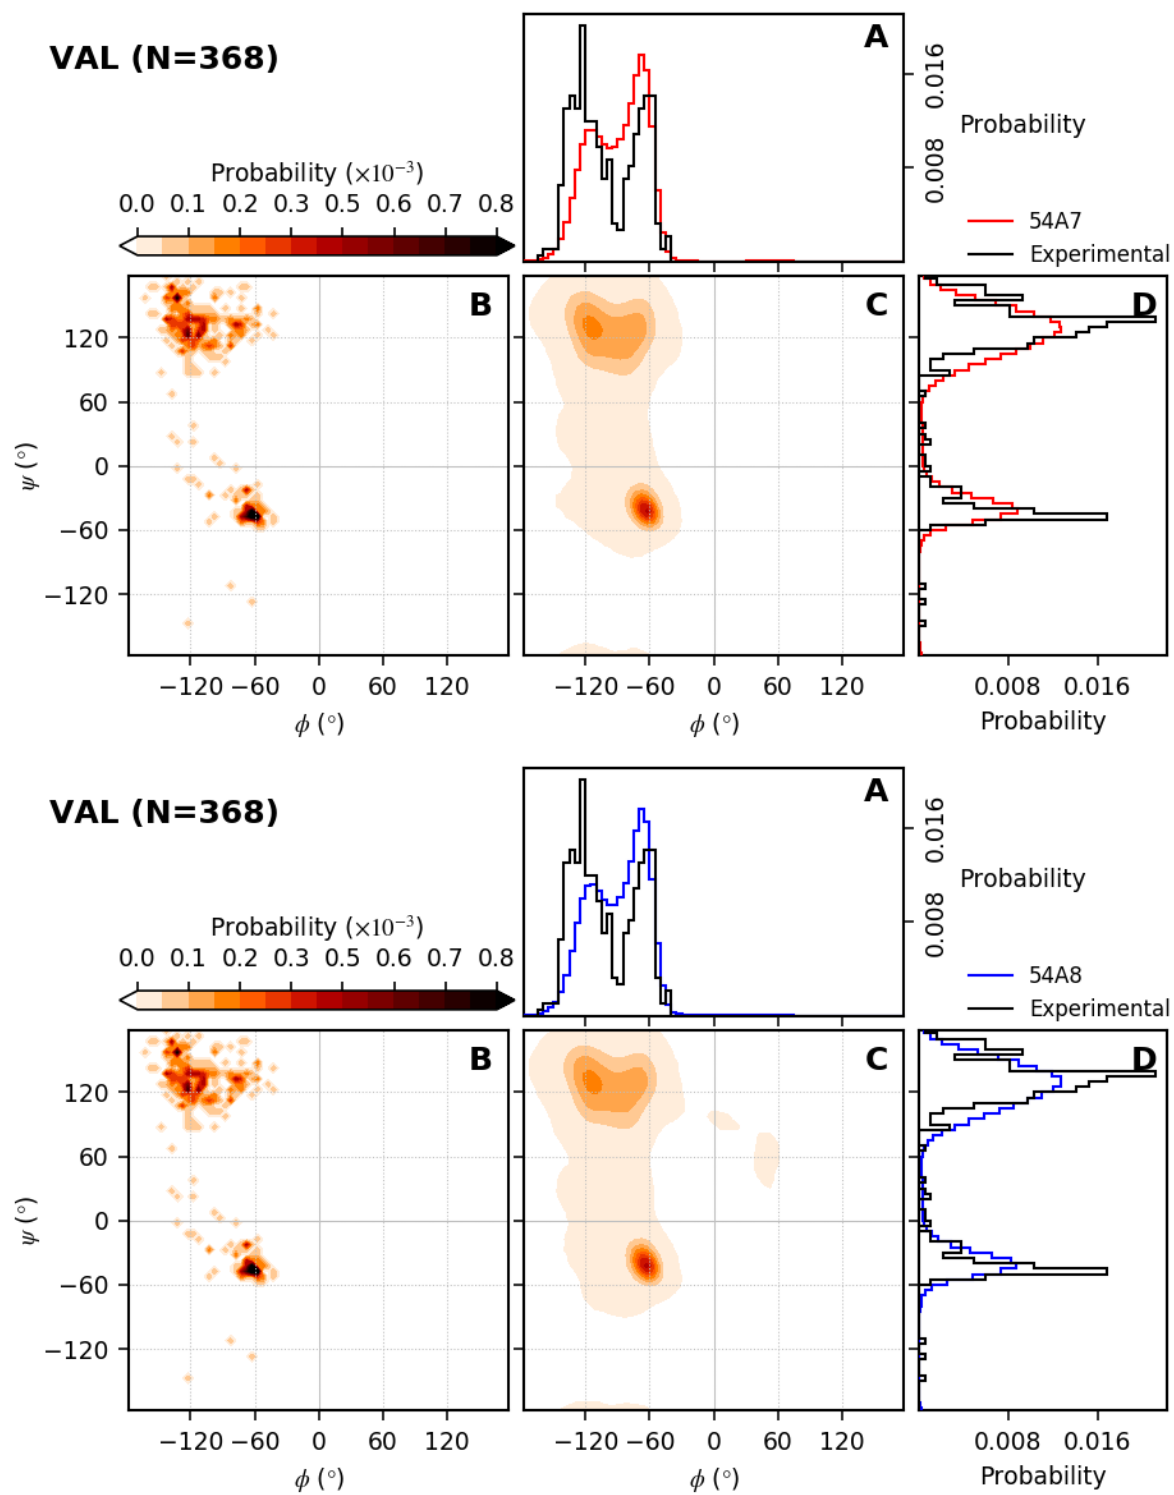

**Figure S25.** Distribution of valine (VAL) backbone dihedral angles.
